# Supplementary material for: Facile and systematic access to the least-coordinating WCA [(RFO)3Al–F–Al(ORF)3]– and its more Lewis-basic brother [F–Al(ORF)3]– (RF = C(CF3)3)
Source: PubMed Central journal article supplement — Chem Sci. 2018 Aug 1;9(35):7058–68. doi: 10.1039/c8sc02591f (PMC6137444; doi:10.1039/c8sc02591f), 2018-08-01
Supplement: SC-009-C8SC02591F-s001.pdf [file SC-009-C8SC02591F-s001.pdf]

## Electronic Supporting Information

to

### Facile and Systematic Access to the Least-coordinating WCA [[R<sup>F</sup>O]<sub>3</sub>Al–F–Al(OR<sup>F</sup>)<sub>3</sub>]<sup>–</sup> and Its Lewis Basic Brother [F–Al(OR<sup>F</sup>)<sub>3</sub>]<sup>–</sup> (R<sup>F</sup> = C(CF<sub>3</sub>)<sub>3</sub>)

Arthur Martens, Philippe Weis, Michael Krummer, Marvin Kreuzer, Andreas Meierhöfer, Stefan C. Meier, Jan Bohnenberger, Harald Scherer, Ian Riddlestone, Ingo Krossing\*

M.Sc. A. Martens, M.Sc. P. Weis, B.Sc. M. Krummer, B.Sc. M. Kreuzer, B.Sc. A. Meierhöfer, M.Sc. S. C. Meier, M.Sc. J. Bohnenberger, Dr. H. Scherer, Dr. Ian Riddlestone, Prof. Dr. I. Krossing, Institut für Anorganische und Analytische Chemie and Freiburger Materialforschungszentrum (FMF), Universität Freiburg, Albertstr. 21, 79104 Freiburg, Germany. \* Correspondence to [krossing@uni-freiburg.de](mailto:krossing@uni-freiburg.de).

#### Contents:

|                                                                                                                                                  |    |
|--------------------------------------------------------------------------------------------------------------------------------------------------|----|
| General Considerations .....                                                                                                                     | 2  |
| Experimental Details .....                                                                                                                       | 4  |
| Synthesis of Me <sub>3</sub> SiF .....                                                                                                           | 4  |
| Synthesis of Me <sub>3</sub> Si–F–Al(OR <sup>F</sup> ) <sub>3</sub> .....                                                                        | 4  |
| Synthesis of [Li(NCCCl <sub>3</sub> )] <i>[f–al]</i> .....                                                                                       | 6  |
| Reaction of Me <sub>3</sub> Si–F–Al(OR <sup>F</sup> ) <sub>3</sub> with DMC.....                                                                 | 8  |
| Large scale synthesis of DMC–Al(OR <sup>F</sup> ) <sub>3</sub> .....                                                                             | 10 |
| Synthesis of [Li(DMC) <sub>2</sub> ] <i>[f–al]</i> .....                                                                                         | 12 |
| Synthesis of K <i>[f–al]</i> .....                                                                                                               | 14 |
| Synthesis of K <i>[al–f–al]</i> .....                                                                                                            | 15 |
| Synthesis of Ag <i>[f–al]</i> .....                                                                                                              | 16 |
| Synthesis of Ag <i>[al–f–al]</i> .....                                                                                                           | 18 |
| Synthesis of [NO] <i>[f–al]</i> .....                                                                                                            | 20 |
| Synthesis of [NO] <i>[al–f–al]</i> .....                                                                                                         | 21 |
| Synthesis of [Ph <sub>3</sub> C] <i>[f–al]</i> .....                                                                                             | 22 |
| Synthesis of [Ph <sub>3</sub> C] <i>[al–f–al]</i> .....                                                                                          | 22 |
| Investigations on the Al(OR <sup>F</sup> ) <sub>3</sub> exchange reactions of <i>[al–f–al]</i> <sup>–</sup> and <i>[f–al]</i> <sup>–</sup> ..... | 22 |
| Reactions of Me <sub>3</sub> Si–F–Al(OR <sup>F</sup> ) <sub>3</sub> with [Cat][BF <sub>4</sub> ].....                                            | 24 |
| Reaction of Ag <i>[al–f–al]</i> with R <sub>3</sub> SiX.....                                                                                     | 25 |
| Reaction of Ag <i>[f–al]</i> with PCl <sub>3</sub> .....                                                                                         | 28 |
| Crystal Structure Data .....                                                                                                                     | 30 |
| Crystal Structures of [SeCl <sub>3</sub> ][WCA] .....                                                                                            | 30 |
| Crystal Structure of [Li(NCCCl <sub>3</sub> )] <i>[f–al]</i> .....                                                                               | 31 |
| Crystal Structure of DMC–Al(OR <sup>F</sup> ) <sub>3</sub> .....                                                                                 | 32 |
| Crystal Structure of [Li(DMC) <sub>3</sub> ] <i>[f–al]</i> .....                                                                                 | 34 |
| Crystal Structure of [Ag( <i>o</i> -DFB) <sub>3</sub> ] <i>[f–al]</i> .....                                                                      | 35 |

|                                                                                                        |    |
|--------------------------------------------------------------------------------------------------------|----|
| Crystal Structure of $[\text{Ag}(o\text{-DFB})_3][al-f-al]$ .....                                      | 37 |
| Crystal Structure of $[\text{Ag}(o\text{-DFB})_2][al-f-al]$ .....                                      | 38 |
| Crystal Structure of $[\text{Ag}(o\text{-DFB})_2][\text{Al}(\text{OR}^F)_4]$ .....                     | 40 |
| Crystal Structure of $[\text{NO}][al-f-al]$ .....                                                      | 41 |
| Crystal Structure of $[\text{Ag}(\text{PhF})_2][\text{F}_2\text{B}(\text{OR}^F)_2]$ .....              | 43 |
| Crystal Structure of $[\text{Ag}(t\text{Bu}_3\text{SiBr})_2(\text{CH}_2\text{Cl}_2)_2][al-f-al]$ ..... | 44 |
| Quantum Chemical Calculations .....                                                                    | 47 |
| Optimized coordinates and energies of the calculated compounds:.....                                   | 48 |
| BP86/def-SV(P) .....                                                                                   | 48 |
| BP86-D3(BJ)/def-SV(P) .....                                                                            | 49 |
| COSMO ( $\epsilon = 8.93$ )/BP86-D3(BJ)/def-SV(P).....                                                 | 56 |
| COSMO ( $\epsilon = 16.3$ )/BP86-D3(BJ)/def-SV(P).....                                                 | 60 |

## General Considerations

All reactions were carried out in an inert gas atmosphere of argon, using standard vacuum and Schlenk techniques or a glove box to exclude air and moisture. All solvents and reagents were dried using standard drying agents ( $\text{CaH}_2$ ,  $\text{P}_4\text{O}_{10}$ ) and were subsequently distilled into airtight vessels. Solution NMR spectra were recorded on a Bruker Avance II WB 400 MHz, Bruker Avance III HD 300 MHz and a Bruker Avance DPX 200 MHz NMR spectrometer using the software package Bruker Topspin 3.2 for analysis. Samples were prepared in 5 mm NMR tubes and then flame-sealed in vacuo. Resonances are given in ppm and referenced to  $\text{SiMe}_4$  for the  $^1\text{H}$ ,  $^{13}\text{C}$  and  $^{29}\text{Si}$  NMR spectra, to  $\text{CFCl}_3$  for the  $^{19}\text{F}$  NMR spectra and to a 1.1 M solution of  $\text{Al}(\text{NO}_3)_3$  in  $\text{D}_2\text{O}$  for the  $^{27}\text{Al}$  NMR spectra. Raman spectra were measured on a Bruker Vertex 70 with a Bruker RAM II module in a range of 50 – 4000  $\text{cm}^{-1}$  and analyzed with the OPUS software package. IR spectra were measured on a Bruker Alpha Fourier transform IR spectrometer in a range of 400 – 4000  $\text{cm}^{-1}$  using a diamond ATR unit and analyzed with the OPUS software package.

[NMR 1] R. K. Harris, E. D. Becker, S. M. Cabral de Menezes, R. Goodfellow, P. Granger, *Pure Appl. Chem.* **2001**, 73, 1795.

**Single Crystal Diffraction:** Obtained single crystals were coated with perfluoroether oil and mounted on 0.1 mm micromounts at the respective crystallization temperature. The crystal structure data were collected from the shock-cooled crystals at 100 K, on a Bruker SMART APEXII QUAZAR CCD area detector diffractometer using  $\text{Mo-K}_\alpha$  radiation. Data reduction was done with SAINT<sup>[1]</sup> and scaling of the data and absorption correction was performed by SADABS<sup>[2]</sup>. The structures were solved by intrinsic phasing using SHELXT<sup>[3]</sup> and were refined by full matrix least squares minimization on  $F^2$  using all reflections with SHELXL<sup>[4]</sup> in the ShelXle<sup>[5]</sup> GUI. In addition, a riding model was used to attribute idealized positions to all hydrogen atoms. The disorder of the  $\text{OR}^F$  groups in the compounds was treated using DSR.<sup>[6]</sup> The graphical representations were prepared using the software Mercury 3.6.<sup>[7]</sup>

- [1] *SAINT*, BRUKER-AXS, Madison, Wisconsin, USA, **2013**.
- [2] L. Krause, R. Herbst-Irmer, G. M. Sheldrick, D. Stalke, *J. Appl. Cryst.* **2015**, *48*, 3–10.
- [3] G. M. Sheldrick, *Acta Cryst. A* **2015**, *71*, 3–8.
- [4] G. M. Sheldrick, *Acta Cryst. C* **2015**, *71*, 3–8.
- [5] C. B. Hubschle, G. M. Sheldrick and B. Dittrich, *J. Appl. Cryst.* **2011**, *44*, 1281-1284.
- [6] D. Kratzert, J. J. Holstein, I. Krossing, *J. Appl. Cryst.* **2015**, *48*, 933–938.  
[www.xs3.uni-freiburg.de/research/dsr](http://www.xs3.uni-freiburg.de/research/dsr)
- [7] C. F. Macrae, P. R. Edgington, P. McCabe, E. Pidcock, G. P. Shields, R. Taylor, M. Towler, J. van de Streek, *J. Appl. Cryst.* **2006**, *39*, 453–457.

## Experimental Details

### Synthesis of Me<sub>3</sub>SiF

A two-necked flask was equipped with a reflux condenser (−30°C), followed by a cooling trap (−78°C). (NH<sub>4</sub>)<sub>2</sub>SiF<sub>6</sub> (20.0 g, 0.11 mmol) was weighed into the flask and suspended in glyme (60 ml). After addition of Me<sub>3</sub>SiCl (18.5 ml, 0.14 mmol, 1.3 eq.) the reaction mixture was refluxed for 1 h. Then the reflux condenser was allowed to reach 20°C and the Me<sub>3</sub>SiF was distilled into the cooling trap. Then the Me<sub>3</sub>SiF was distilled into an airtight vessel (8.1 g, 80 %). In order to remove residual SiF<sub>4</sub>, the Me<sub>3</sub>SiF was cooled to −40°C. The SiF<sub>4</sub> was then removed in vacuo.

**<sup>1</sup>H-NMR (400.17 MHz, 298 K, CD<sub>2</sub>Cl<sub>2</sub>):** δ = 0.27 (d, <sup>3</sup>J<sub>H-F</sub> = 7.4 Hz, (CH<sub>3</sub>)<sub>3</sub>SiF) ppm.

**<sup>19</sup>F-NMR (376.49 MHz, 298 K, CD<sub>2</sub>Cl<sub>2</sub>):** δ = −158 (dec, Me<sub>3</sub>SiF) ppm.

**<sup>29</sup>Si-NMR (79.50 MHz, 298 K, CD<sub>2</sub>Cl<sub>2</sub>):** δ = 33.3 (d, <sup>1</sup>J<sub>Si-F</sub> = 290 Hz, Me<sub>3</sub>SiF) ppm.

### Synthesis of Me<sub>3</sub>Si-F-Al(OR<sup>F</sup>)<sub>3</sub>

AlEt<sub>3</sub> (15 ml, 109 mmol) was dissolved in heptane (120 ml) and cooled to −40°C. Under vigorous stirring with a large (!) stirring bar, HOR<sup>F</sup> (30 ml, 215 mmol, 2.0 eq.) was added dropwise (!) to the reaction mixture, while keeping the cooling bath between −40 and −20°C. During the addition of HOR<sup>F</sup>, gas evolution (C<sub>2</sub>H<sub>6</sub>) could be observed and the viscosity of the solution increased and also small amounts of precipitate formed. After complete addition of HOR<sup>F</sup>, Me<sub>3</sub>SiF (12.5 g, 136 mmol, 1.2 eq.) was condensed onto the reaction mixture at −40°C. The solution was stirred for 5 min. and then more HOR<sup>F</sup> (20 ml, 108 mmol, 1.0 eq.) was added slowly. The cooling bath was removed and the reaction mixture was allowed to reach r.t., which led to the dissolving of the precipitate. After 30 min more HOR<sup>F</sup> (5.0 ml, 36 mmol, 0.3 eq.) was added and the solution was stirred overnight. From the solution, a white powder crystallized and the solvent was removed in vacuo. The product was obtained as a white crystalline powder (85.4 g, 103 mmol, 94 %).

**<sup>1</sup>H-NMR (300.18 MHz, 298 K, CD<sub>2</sub>Cl<sub>2</sub>/o-DFB):** δ = 0.78 (d, <sup>3</sup>J<sub>H-F</sub> = 12.6 Hz, (CH<sub>3</sub>)<sub>3</sub>Si-F-Al(OR<sup>F</sup>)<sub>3</sub>) ppm.

**<sup>19</sup>F-NMR (282.45 MHz, 298 K, CD<sub>2</sub>Cl<sub>2</sub>/o-DFB):** δ = −75.8 (s, 27 F, Me<sub>3</sub>Si-F-Al(OR<sup>F</sup>)<sub>3</sub>), −156.2 (dec, <sup>3</sup>J<sub>H-F</sub> = 12.6 Hz, 1 F, Me<sub>3</sub>Si-F-Al(OR<sup>F</sup>)<sub>3</sub>), ppm.

**<sup>27</sup>Al-NMR (78.22 MHz, 298 K, CD<sub>2</sub>Cl<sub>2</sub>/o-DFB):** δ = 37 (s, br, Me<sub>3</sub>Si-F-Al(OR<sup>F</sup>)<sub>3</sub>) ppm.

**<sup>29</sup>Si-NMR (59.64 MHz, 298 K, CD<sub>2</sub>Cl<sub>2</sub>/o-DFB):** δ = 83.7 (d, <sup>1</sup>J<sub>Si-F</sub> = 285 Hz, Me<sub>3</sub>Si-F-Al(OR<sup>F</sup>)<sub>3</sub>) ppm.

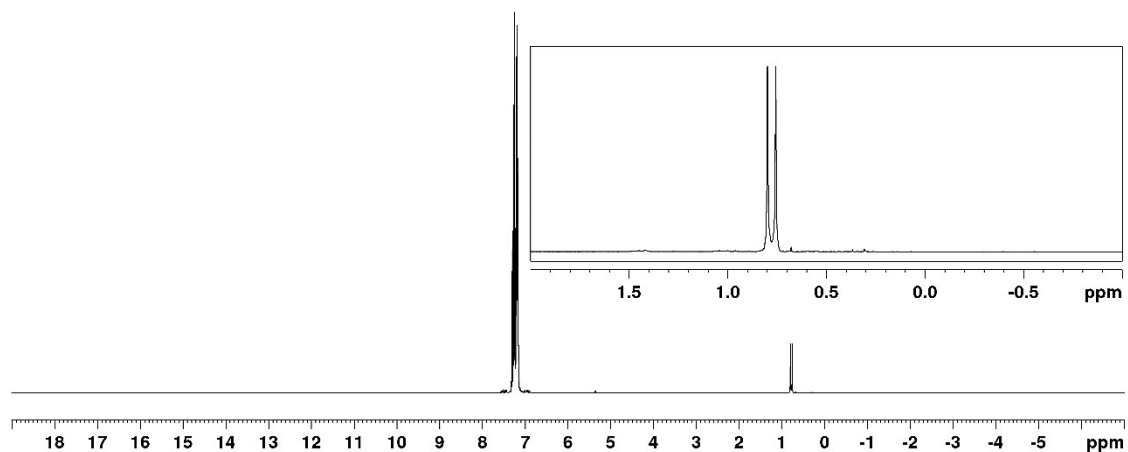

Figure S- 1:  $^1\text{H-NMR}$  spectrum (300.18 MHz, 298 K,  $\text{CD}_2\text{Cl}_2/o\text{-DFB}$ ) of  $\text{Me}_3\text{Si-F-Al}(\text{OR}^f)_3$ .

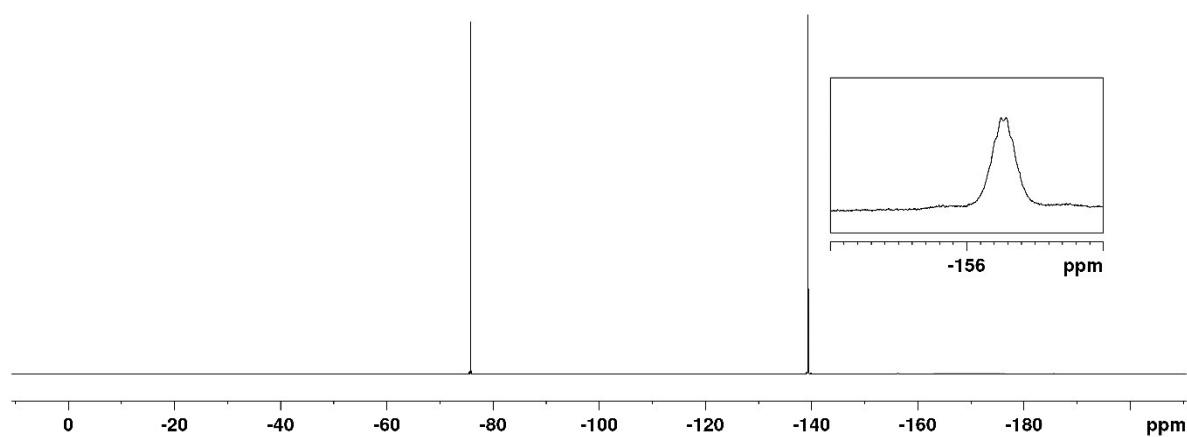

Figure S- 2:  $^{19}\text{F-NMR}$  spectrum (282.45 MHz, 298 K,  $\text{CD}_2\text{Cl}_2/o\text{-DFB}$ ) of  $\text{Me}_3\text{Si-F-Al}(\text{OR}^f)_3$ .

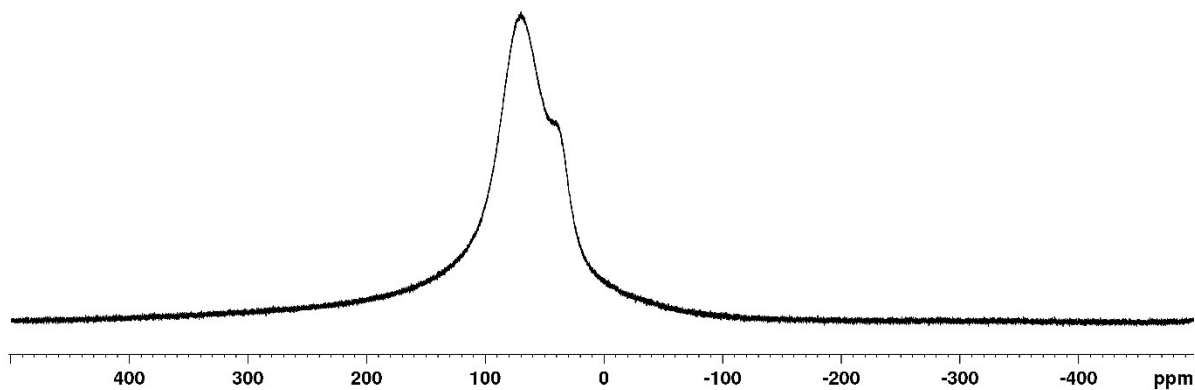

Figure S- 3:  $^{27}\text{Al-NMR}$  spectrum (78.22 MHz, 298 K,  $\text{CD}_2\text{Cl}_2/o\text{-DFB}$ ) of  $\text{Me}_3\text{Si-F-Al}(\text{OR}^f)_3$ .

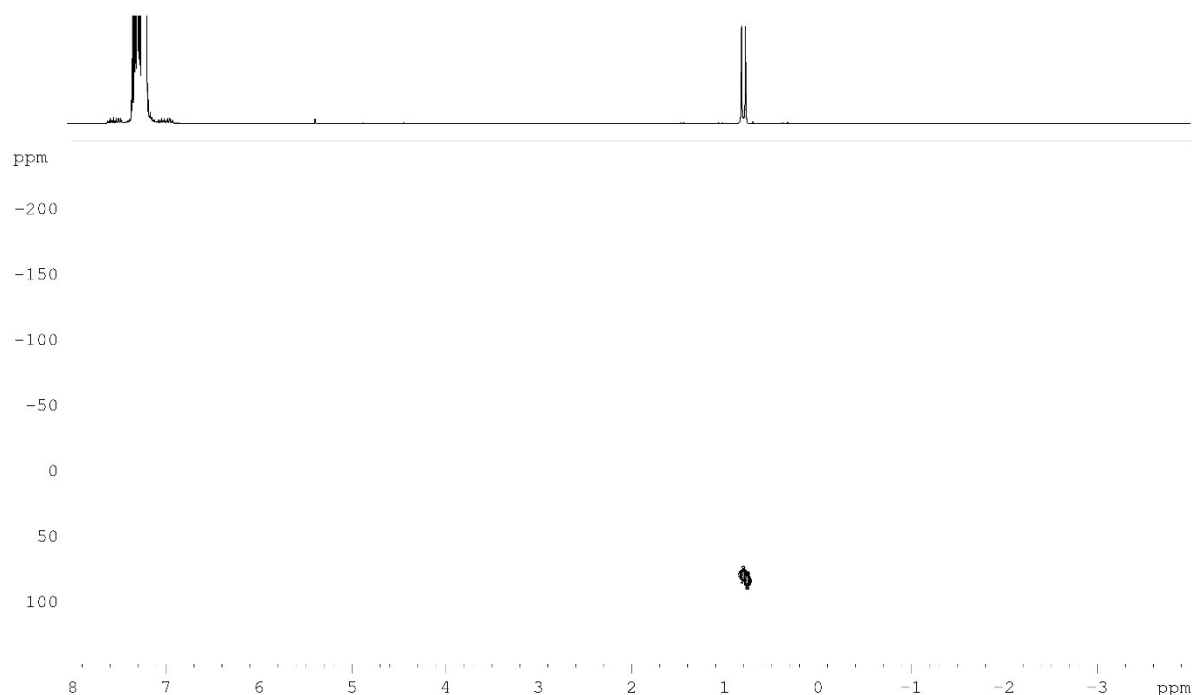

Figure S- 4: <sup>1</sup>H,<sup>29</sup>Si HMBC NMR spectrum (300.18 MHz, 298 K, CD<sub>2</sub>Cl<sub>2</sub>/*o*-DFB) of Me<sub>3</sub>Si-F-Al(OR<sup>F</sup>)<sub>3</sub>.

### Synthesis of [Li(NCCCl<sub>3</sub>)]*[f-a]*

Me<sub>3</sub>Si-F-Al(OR<sup>F</sup>)<sub>3</sub> (998 mg, 1.21 mmol) and LiPF<sub>6</sub> (183 mg, 1.20 mmol, 1.00 eq.) were suspended in *o*-DFB (3 ml) and Cl<sub>3</sub>CCN (1 ml) and heated to 60°C. The evolving gas was allowed to evaporate from the solution. After 4 h the solvent was removed in vacuo and the residue was dissolved in *o*-DFB (1 ml). The product was then precipitated by addition of CH<sub>2</sub>Cl<sub>2</sub> (5 ml). After removal of the solvent in vacuo the product was obtained as colorless powder (912 mg, 1.01 mmol, 84 %).

In order to obtain single crystals of the product, the CH<sub>2</sub>Cl<sub>2</sub> in the reaction solution was removed under reduced pressure until the product was dissolved again (~2 ml). The solution was stored at -40°C and yielded single crystals of [Li(NCCCl<sub>3</sub>)]*[f-a]*.

**<sup>7</sup>Li-NMR (116.66 MHz, 298 K, CD<sub>3</sub>CN/*o*-DFB):** δ = -2.5 (s, Li<sup>+</sup>) ppm.

**<sup>19</sup>F-NMR (282.45 MHz, 298 K, CD<sub>3</sub>CN/*o*-DFB):** δ = -76.1 (d, 27 F, <sup>5</sup>J<sub>F-F</sub> = 2 Hz, [F-Al(OR<sup>F</sup>)<sub>3</sub>]<sup>-</sup>), -186.2 (m, 1 F, [F-Al(OR<sup>F</sup>)<sub>3</sub>]<sup>-</sup>) ppm.

**<sup>27</sup>Al-NMR (78.22 MHz, 298 K, CD<sub>3</sub>CN/*o*-DFB):** δ = 41.1 (d, <sup>1</sup>J<sub>Al-F</sub> = 30 Hz, [F-Al(OR<sup>F</sup>)<sub>3</sub>]<sup>-</sup>) ppm.

**ATR-IR (diamond):**  $\tilde{\nu}$  = 1354 (w), 1298 (w), 1254 (vs), 1240 (vs), 1217 (vs), 1179 (s), 1033 (vw), 970 (vs), 871 (w), 843 (w), 795 (m), 758 (w), 725 (vs), 663 (w), 567 (w), 536 (w), 507 (w), 451 (w), 388 (m) cm<sup>-1</sup>.

**FT-Raman:**  $\tilde{\nu}$  = 2939 (17), 2923 (17), 2909 (17), 2758 (17), 2286 (100), 800 (50), 758 (33), 749 (33), 725 (0), 704 (0), 570 (33), 538 (33), 501 (67), 330 (50), 297 (17), 266 (83), 180 (83) cm<sup>-1</sup>.

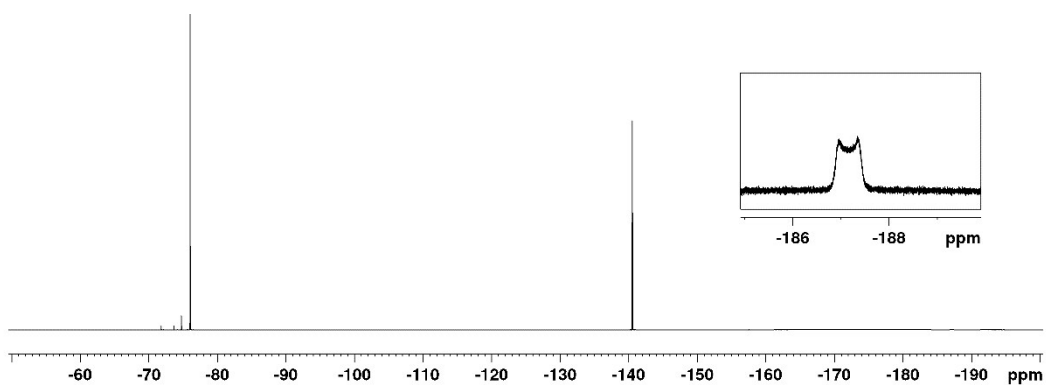

Figure S- 5:  $^{19}\text{F}$ -NMR spectrum (282.45 MHz, 298 K,  $\text{CD}_3\text{CN}/o\text{-DFB}/\text{Cl}_3\text{CCN}$ ) of  $[\text{Li}(\text{NCCCl}_3)][f\text{-}a]$ .

The doublet at  $\delta^{19}\text{F} = -73$  ppm results from small residues of  $[\text{PF}_6]^-$ .

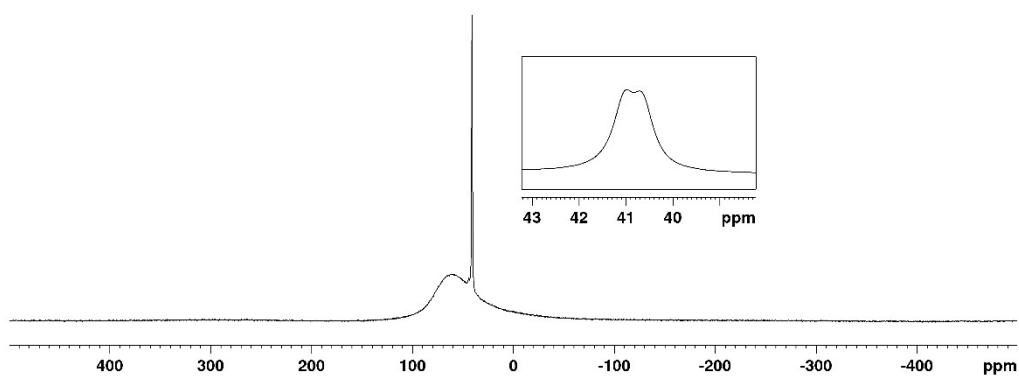

Figure S- 6:  $^{27}\text{Al}$ -NMR spectrum (78.22 MHz, 298 K,  $\text{CD}_3\text{CN}/o\text{-DFB}/\text{Cl}_3\text{CCN}$ ) of  $[\text{Li}(\text{NCCCl}_3)][f\text{-}a]$ .

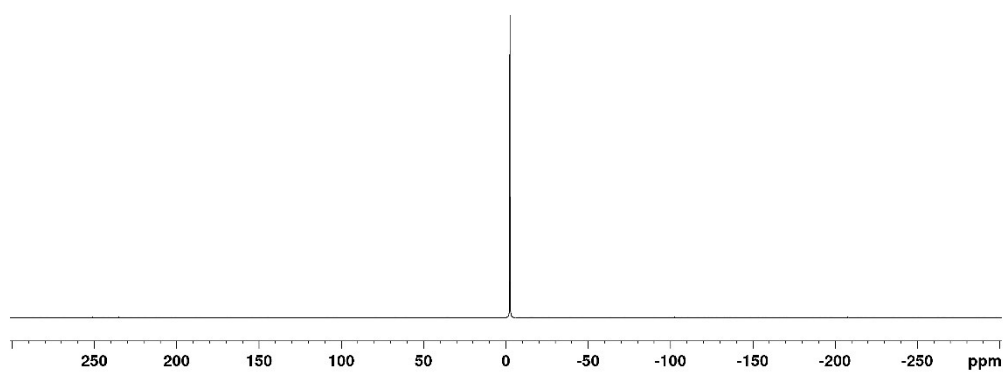

Figure S- 7:  $^7\text{Li}$ -NMR spectrum (116.66 MHz, 298 K,  $\text{CD}_3\text{CN}/o\text{-DFB}/\text{Cl}_3\text{CCN}$ ) of  $[\text{Li}(\text{NCCCl}_3)][f\text{-}a]$ .

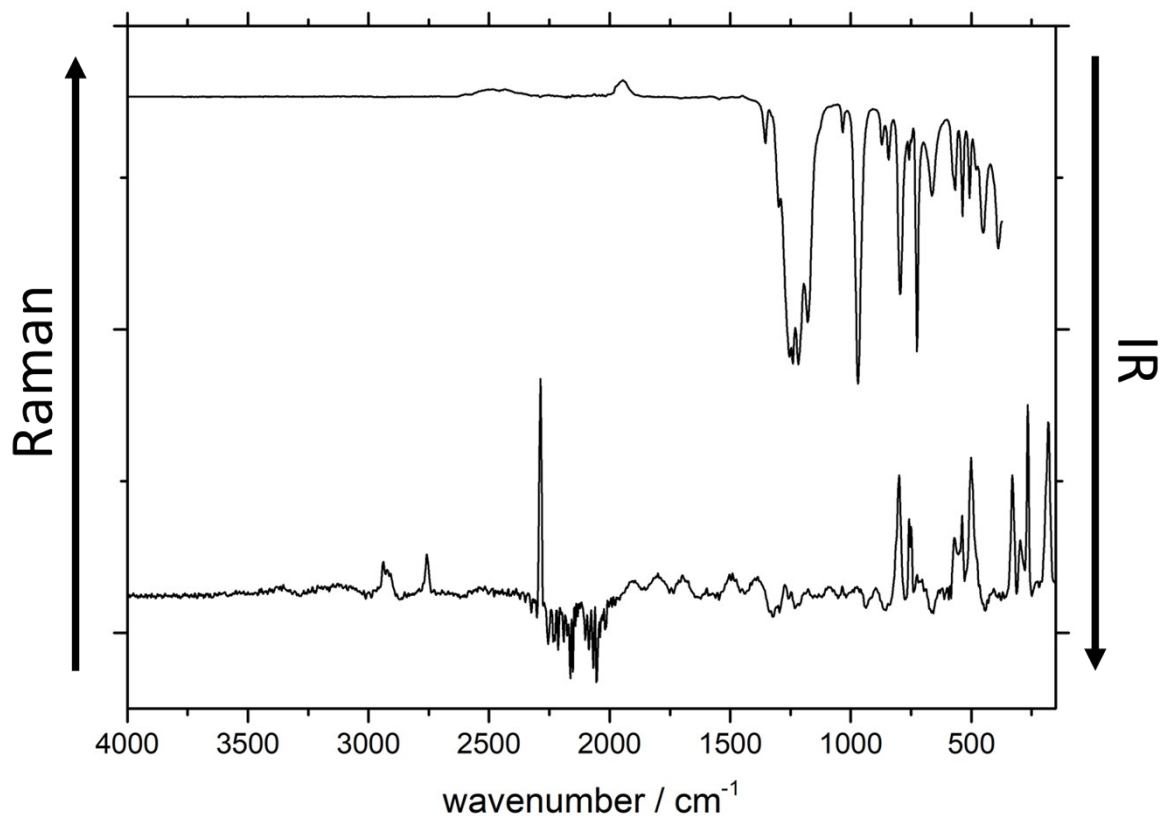

Figure S- 8: ATR-IR (top) and Raman (bottom) spectra of  $[\text{Li}(\text{NCCl}_3)[f\text{-al}]$ . The vibrational bands at  $\sim 3000 \text{ cm}^{-1}$  are caused by fingerprints inside the Raman spectrometer.

### Reaction of $\text{Me}_3\text{Si-F-Al}(\text{OR}^f)_3$ with DMC

$\text{Me}_3\text{Si-F-Al}(\text{OR}^f)_3$  was filled in an NMR tube and dissolved in dimethyl carbonate (DMC). Immediately, a slight gas evolution was visible. The sample was then analyzed in the NMR spectrometer.

In the  $^1\text{H}$  and  $^{13}\text{C}$  NMR spectra no signal of  $\text{DMC-Al}(\text{OR}^f)_3$  is not visible due to dynamic exchange. The sample contained small amounts of  $\text{Me}_3\text{Si-O-SiMe}_3$  impurities.

**$^1\text{H-NMR}$  (300.18 MHz, 298 K, DMC):**  $\delta = 3.79$  (s,  $(\text{CH}_3\text{O})_2\text{CO}$ ), 0.25 (d,  $^3J_{\text{H-F}} = 7.4$  Hz,  $(\text{CH}_3)_3\text{SiF}$ ) ppm.

**$^{13}\text{C-NMR}$  (75.48 MHz, 298 K, DMC):**  $\delta = 53.9$  (s,  $(\text{CH}_3\text{O})_2\text{CO}$ ), 156.3 (s,  $(\text{CH}_3\text{O})_2\text{CO}$ ) ppm.

**$^{19}\text{F-NMR}$  (282.45 MHz, 298 K, DMC):**  $\delta = -76.5$  (s,  $\text{DMC-Al}(\text{OR}^f)_3$ ),  $-158.8$  (dec,  $^3J_{\text{H-F}} = 7.4$  Hz,  $(\text{CH}_3)_3\text{SiF}$ ) ppm.

**$^{27}\text{Al-NMR}$  (78.22 MHz, 298 K, DMC):**  $\delta = 37$  (s, br,  $\text{DMC-Al}(\text{OR}^f)_3$ ) ppm.



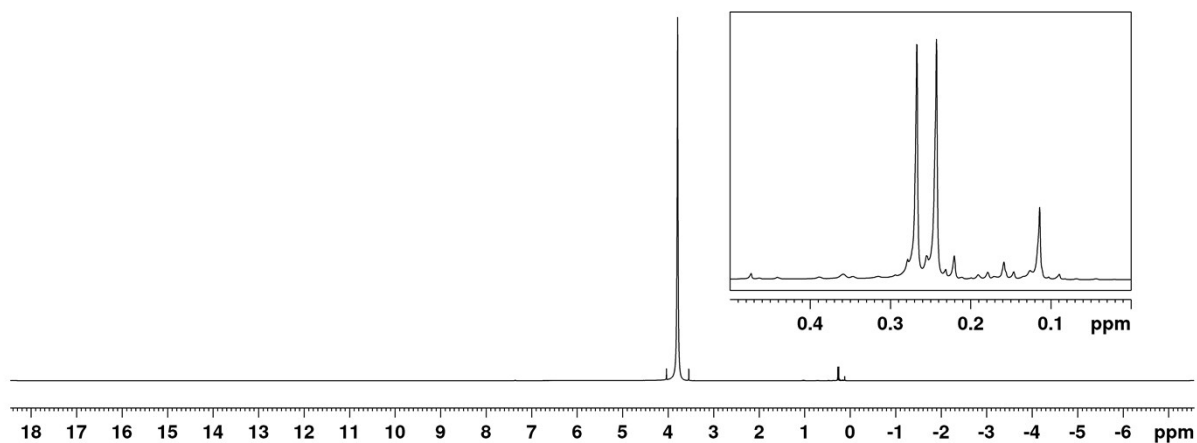

Figure S- 9:  $^1\text{H}$ -NMR spectrum (300.18 MHz, 298 K, DMC) of the reaction of  $\text{Me}_3\text{Si-F-Al}(\text{OR}^f)_3$  with DMC.

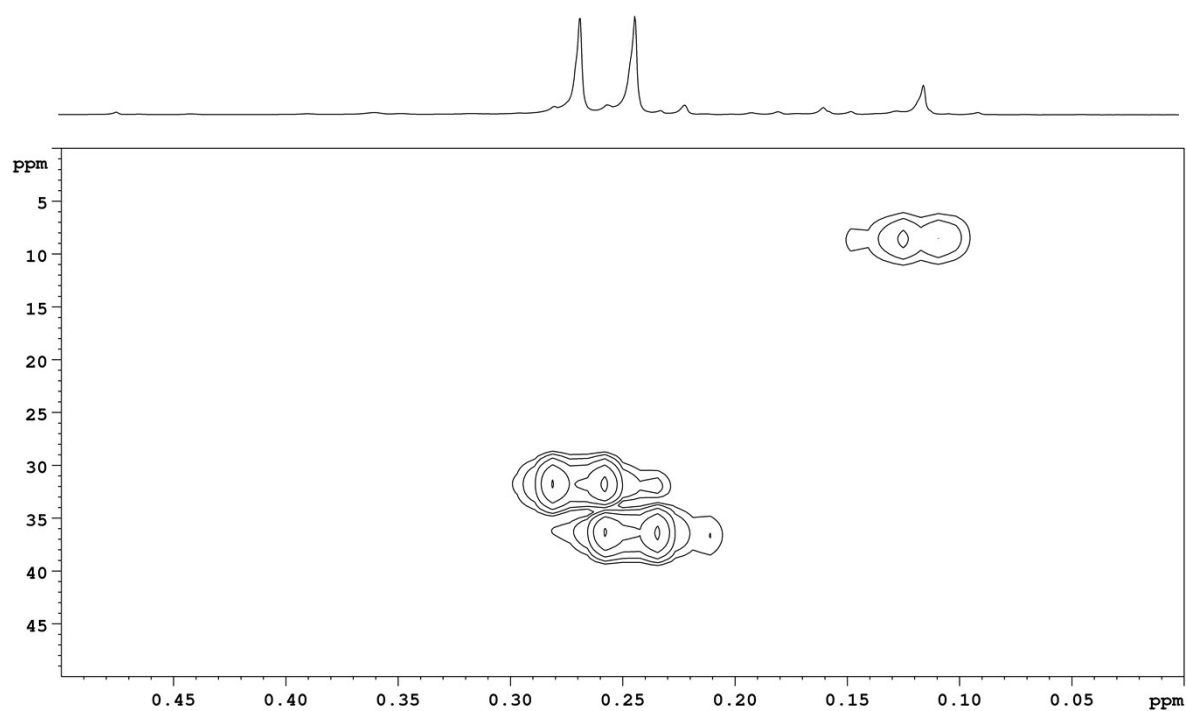

Figure S- 10:  $^1\text{H}$ ,  $^{29}\text{Si}$  HMBC NMR spectrum (298 K, DMC) of the reaction of  $\text{Me}_3\text{Si-F-Al}(\text{OR}^f)_3$  with DMC.

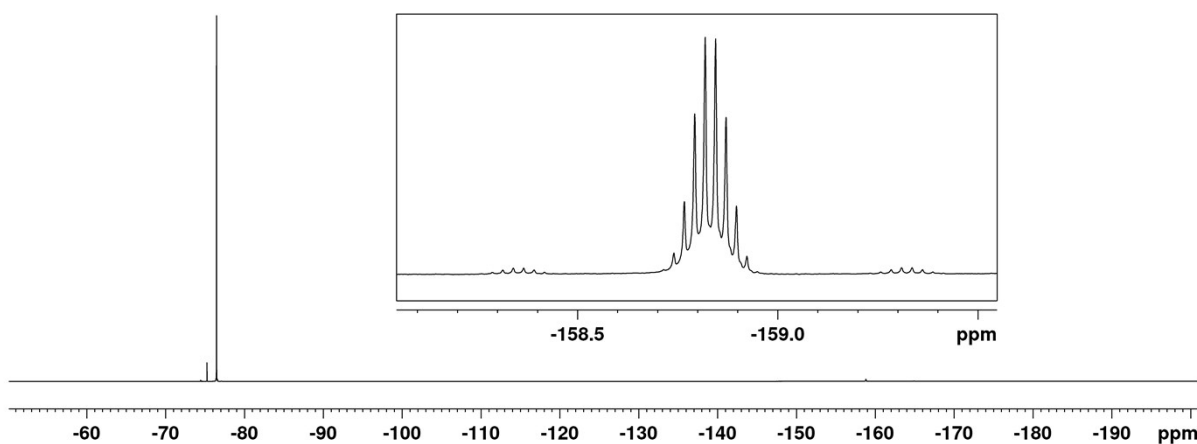

Figure S- 11:  $^{19}\text{F}$ -NMR spectrum (282.45 MHz, 298 K, DMC) of the reaction of  $\text{Me}_3\text{Si-F-Al}(\text{OR}^f)_3$  with DMC.

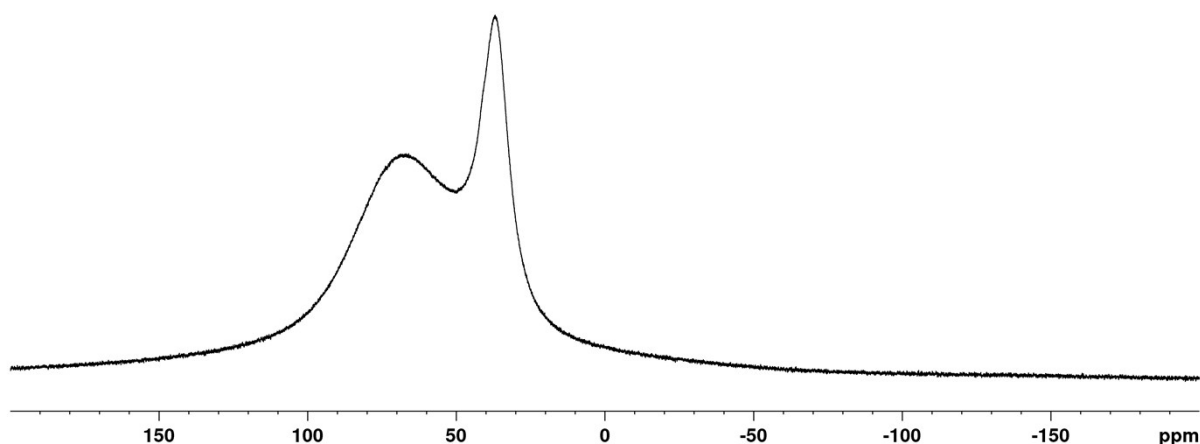

Figure S- 12:  $^{27}\text{Al}$ -NMR spectrum (78.22 MHz, 298 K, DMC) of the reaction of  $\text{Me}_3\text{Si-F-Al}(\text{OR}^{\text{F}})_3$  with DMC.

### Large scale synthesis of $\text{DMC-Al}(\text{OR}^{\text{F}})_3$

In order to prevent loss of the synthesized  $\text{Me}_3\text{SiF}$ , a large scale synthesis of  $\text{DMC-Al}(\text{OR}^{\text{F}})_3$  starting from  $\text{AlEt}_3$  and  $\text{HOR}^{\text{F}}$  was established. This allows for the synthesis of larger amounts of  $[\text{Li}(\text{DMC})_2][f-a]$ .

$\text{AlEt}_3$  (5.0 ml, 36 mmol) was dissolved in hexane (50 ml) and cooled to  $-40^\circ\text{C}$ . Under vigorous stirring,  $\text{HOR}^{\text{F}}$  (10 ml, 72 mmol, 2.0 eq.) was added within 10 min to the reaction mixture, while keeping the cooling bath between  $-40$  and  $-20^\circ\text{C}$ . During the addition of  $\text{HOR}^{\text{F}}$ , gas evolution ( $\text{C}_2\text{H}_6$ ) could be observed and the viscosity of the solution increased and also small amounts of precipitate formed. After complete addition of  $\text{HOR}^{\text{F}}$ ,  $(\text{MeO})_2\text{CO}$  (DMC, 5.0 ml, 59 mmol, 1.6 eq.) was added to the reaction mixture at  $-40^\circ\text{C}$ . The solution was allowed to reach r.t. for 5 min, then cooled to  $-20^\circ\text{C}$ . Then  $\text{HOR}^{\text{F}}$  (8.0 ml, 43 mmol, 1.2 eq.) was added slowly. The cooling bath was removed and the reaction mixture was allowed to reach r.t., which led to the dissolving of the precipitate. When no more gas evolution was visible, the solvent was removed in vacuo. The product was obtained as colorless powder (27.4 g, 33 mmol, 93 %). Single crystals of  $\text{DMC-Al}(\text{OR}^{\text{F}})_3$  could be obtained by storing the reaction mixture at  $2^\circ\text{C}$ .

$^1\text{H-NMR}$  (300.18 MHz, 298 K,  $\text{CD}_2\text{Cl}_2$ ):  $\delta = 4.21$  (s,  $(\text{CH}_3\text{O})_2\text{CO-Al}(\text{OR}^{\text{F}})_3$ ) ppm.

$^{13}\text{C-NMR}$  (75.48 MHz, 298 K,  $\text{CD}_2\text{Cl}_2$ ):  $\delta = 60.8$  (s,  $(\text{CH}_3\text{O})_2\text{CO-Al}(\text{OR}^{\text{F}})_3$ ), 160.0 (s,  $(\text{CH}_3\text{O})_2\text{CO-Al}(\text{OR}^{\text{F}})_3$ ) ppm.

$^{19}\text{F-NMR}$  (282.45 MHz, 298 K,  $\text{CD}_2\text{Cl}_2$ ):  $\delta = -76.0$  (s,  $\text{DMC-Al}(\text{OR}^{\text{F}})_3$ ) ppm.

$^{27}\text{Al-NMR}$  (78.22 MHz, 298 K,  $\text{CD}_2\text{Cl}_2$ ):  $\delta = 37$  (s, br,  $\text{DMC-Al}(\text{OR}^{\text{F}})_3$ ) ppm.

**ATR-IR (diamond):**  $\tilde{\nu} = 1641$  (s), 1534 (s), 1458 (vs), 1436 (vs), 1383 (s), 1356 (vs), 1299 (s), 1240 (w), 1213 (w), 1175 (m), 1118 (vs), 968 (w), 889 (s), 862 (s), 813 (vs), 795 (vs), 725 (w), 669 (vs), 592 (s), 568 (vs), 536 (s), 482 (s), 446 (m).

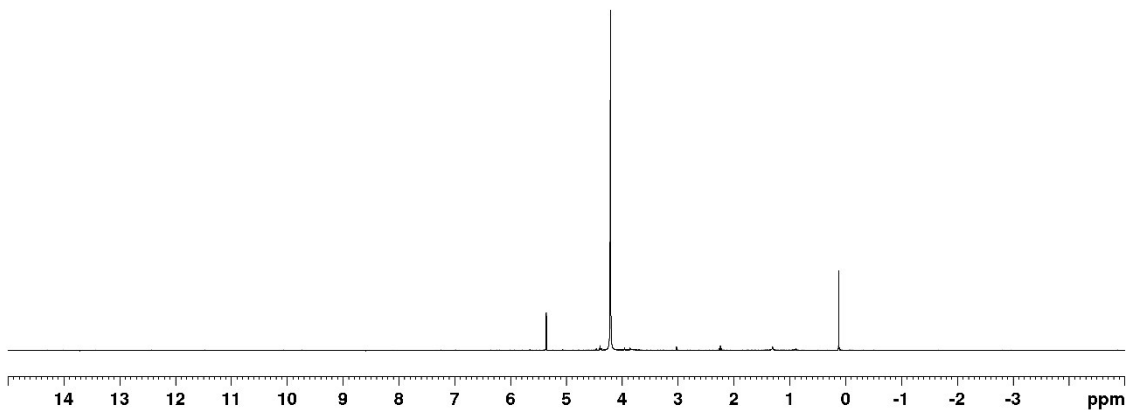

Figure S- 13:  $^1\text{H-NMR}$  spectrum (300.18 MHz, 298 K,  $\text{CD}_2\text{Cl}_2$ ) of  $\text{DMC-Al}(\text{OR}^f)_3$ .

The signal at  $\delta^1\text{H} = 0.10$  ppm results from small amounts of grease in the sample.

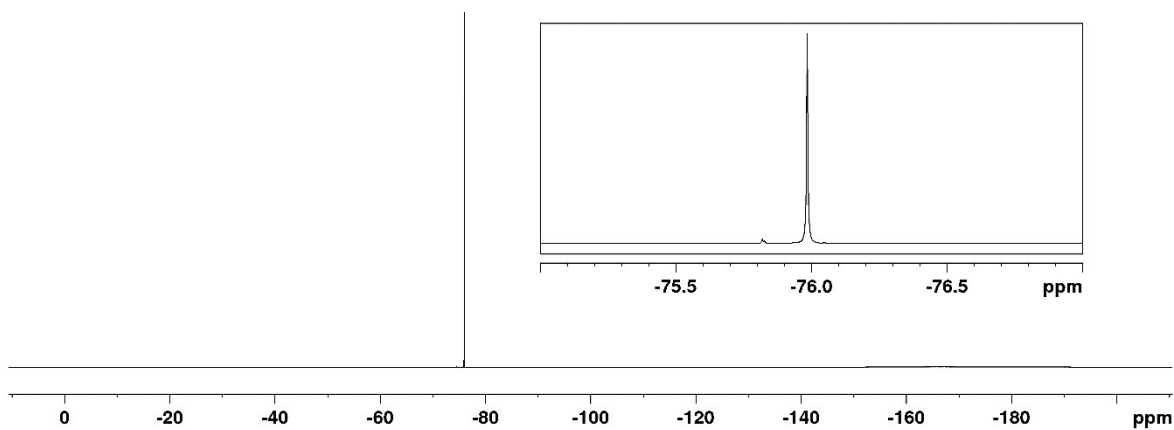

Figure S- 14:  $^{19}\text{F-NMR}$  spectrum (282.45 MHz, 298 K,  $\text{CD}_2\text{Cl}_2$ ) of  $\text{DMC-Al}(\text{OR}^f)_3$ .

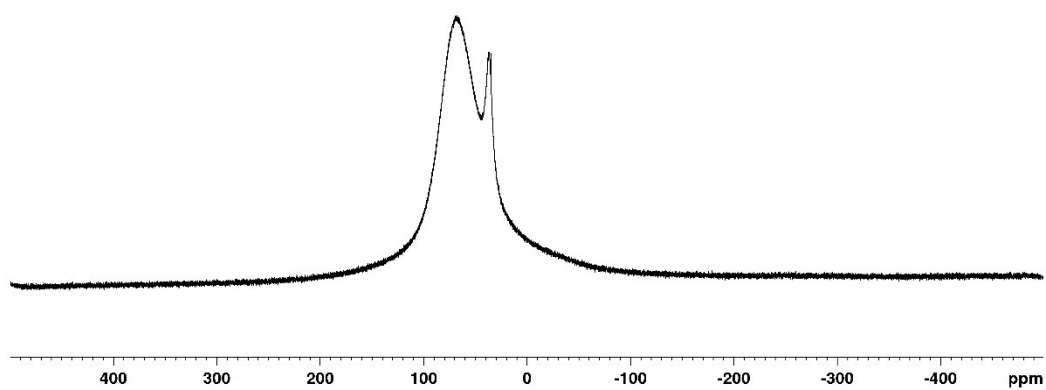

Figure S- 15:  $^{27}\text{Al-NMR}$  spectrum (78.22 MHz, 298 K,  $\text{CD}_2\text{Cl}_2$ ) of  $\text{DMC-Al}(\text{OR}^f)_3$ .

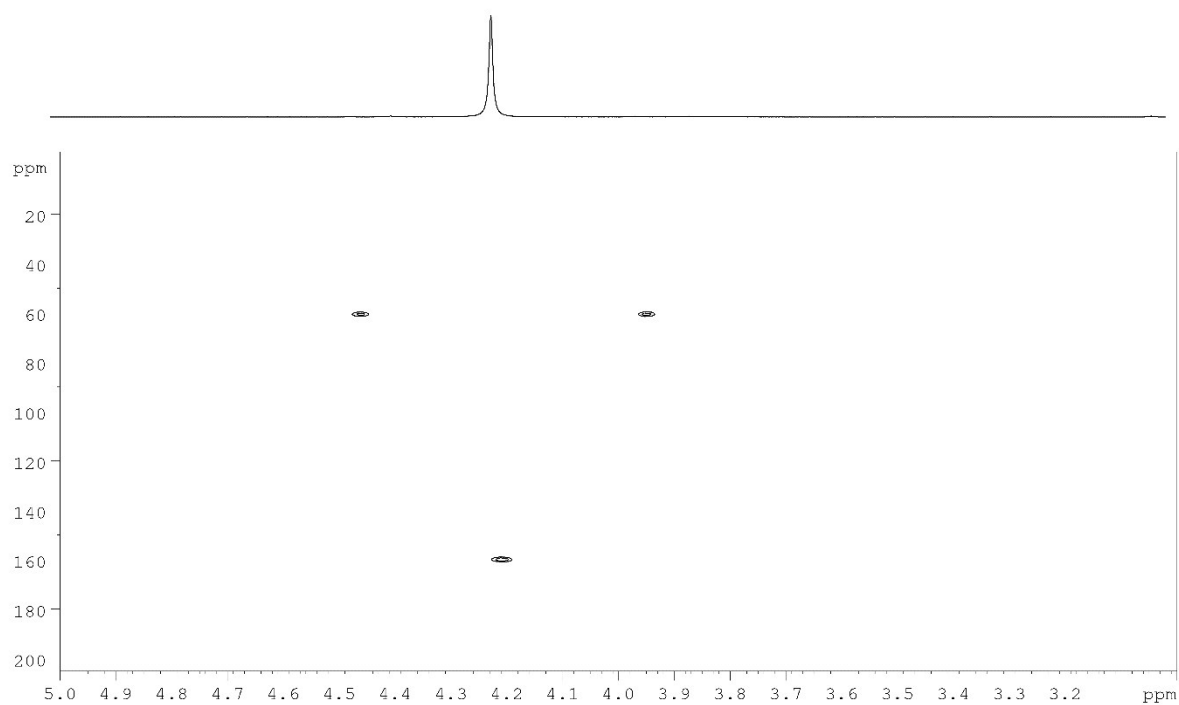

Figure S- 16:  $^1\text{H}$ ,  $^{13}\text{C}$  HMBC NMR spectrum (300.18 MHz, 298 K,  $\text{CD}_2\text{Cl}_2$ ) of  $\text{DMC-Al}(\text{OR}^f)_3$ .

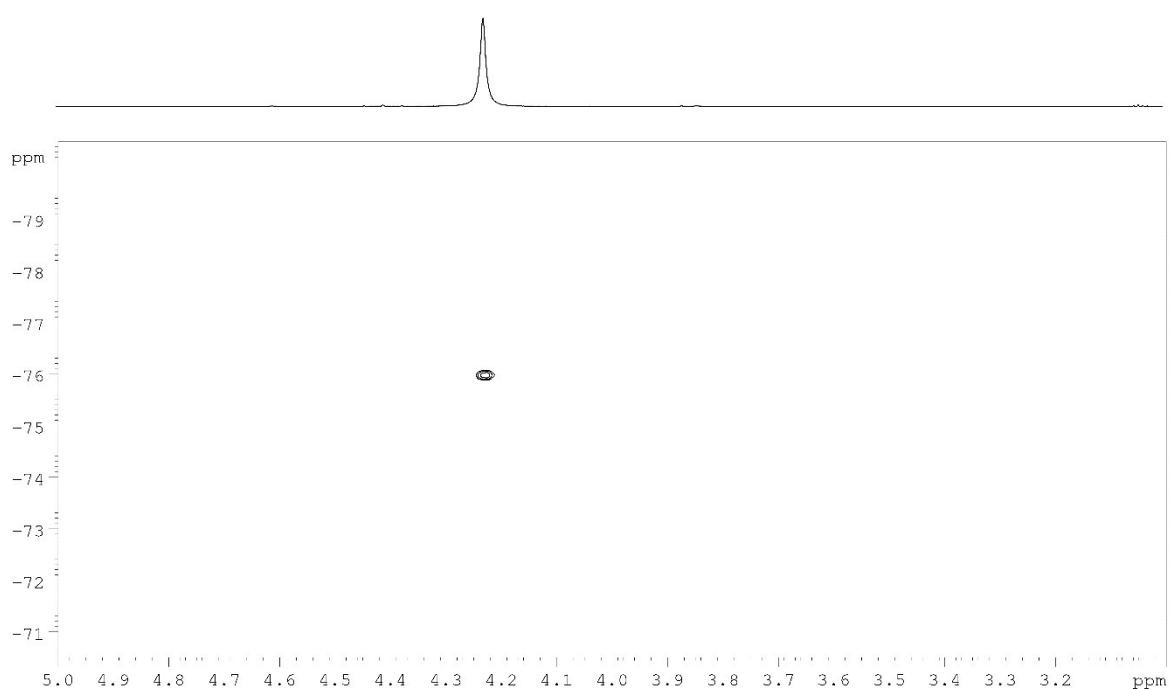

Figure S- 17:  $^1\text{H}$ ,  $^{19}\text{F}$  HOESY NMR spectrum (300.18 MHz, 298 K,  $\text{CD}_2\text{Cl}_2$ ) of  $\text{DMC-Al}(\text{OR}^f)_3$ .

### Synthesis of $[\text{Li}(\text{DMC})_2][f-a]$

$\text{Me}_3\text{Si-F-Al}(\text{OR}^f)_3$  (985 mg, 1.20 mmol) and  $\text{LiPF}_6$  (178 mg, 1.17 mmol, 1.0 eq.) were dissolved in DMC (2 ml) and heated to  $60^\circ\text{C}$ . After 6 h the solvent was slowly removed in vacuo at  $60^\circ\text{C}$ . The product was obtained as colorless powder (951 mg, 1.01 mmol, 86 %). The composition of the cation was determined by addition of *o*-DFB to the NMR as internal

standard for integration. Single crystals of  $[\text{Li}(\text{DMC})_3][f-a]$  could be obtained by addition of  $\text{CH}_2\text{Cl}_2$  to the reaction solution, followed by storage at  $-30^\circ\text{C}$ .

$^1\text{H-NMR}$  (300.18 MHz, 298 K,  $\text{CD}_3\text{CN}/o\text{-DFB}$ ):  $\delta = 3.75$  (s,  $[\text{Li}(\text{DMC})_2]^+$  ppm.

$^7\text{Li-NMR}$  (116.66 MHz, 298 K,  $\text{CD}_3\text{CN}/o\text{-DFB}$ ):  $\delta = -2.6$  (s,  $\text{Li}^+$ ) ppm.

$^{19}\text{F-NMR}$  (282.45 MHz, 298 K,  $\text{CD}_3\text{CN}/o\text{-DFB}$ ):  $\delta = -76.1$  (d, 27 F,  $^5J_{\text{F-F}} = 2$  Hz,  $[\text{F-Al}(\text{OR}^{\text{F}})_3]^-$ ),  $-186.2$  (m, 1 F,  $[\text{F-Al}(\text{OR}^{\text{F}})_3]^-$ ) ppm.

$^{27}\text{Al-NMR}$  (78.22 MHz, 298 K,  $\text{CD}_3\text{CN}/o\text{-DFB}$ ):  $\delta = 41.1$  (d,  $^1J_{\text{Al-F}} = 32$  Hz,  $[\text{F-Al}(\text{OR}^{\text{F}})_3]^-$ ) ppm.

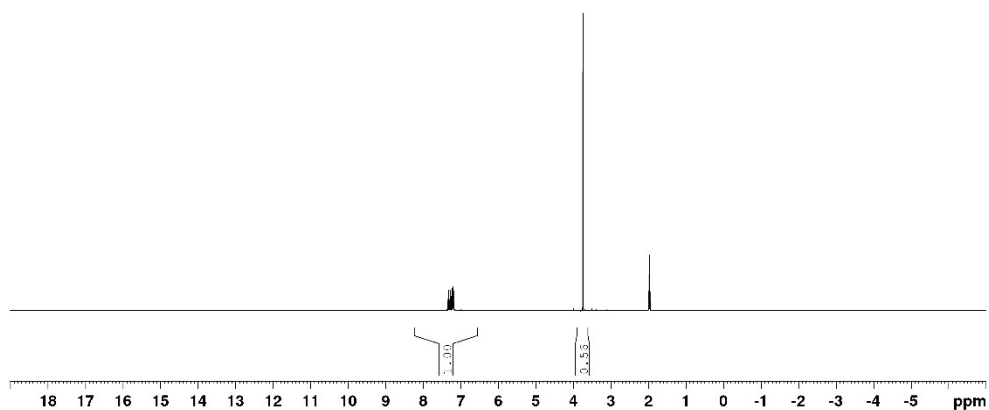

Figure S- 18:  $^1\text{H-NMR}$  spectrum (300.18 MHz, 298 K,  $\text{CD}_3\text{CN}/o\text{-DFB}$ ) of  $[\text{Li}(\text{DMC})_2][f-a]$ .

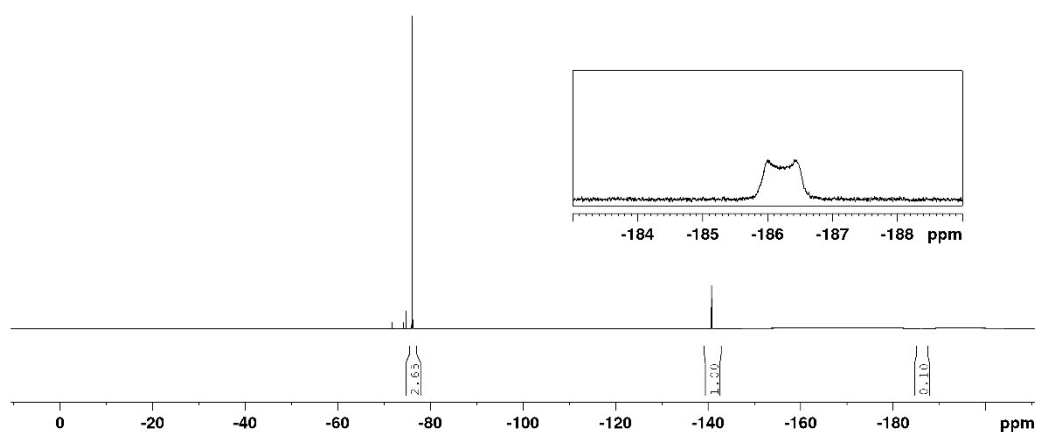

Figure S- 19:  $^{19}\text{F-NMR}$  spectrum (282.45 MHz, 298 K,  $\text{CD}_3\text{CN}/o\text{-DFB}$ ) of  $[\text{Li}(\text{DMC})_2][f-a]$ .

The doublet at  $\delta^{19}\text{F} = -73$  ppm results from small residues of  $[\text{PF}_6]^-$ .

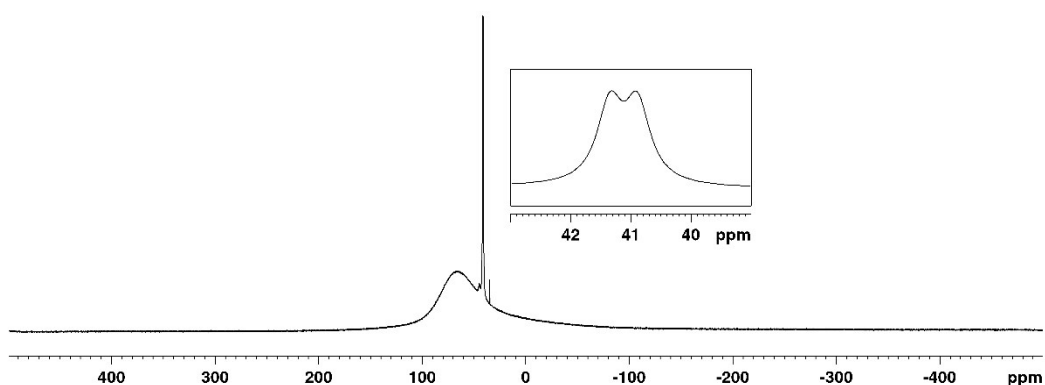

Figure S- 20:  $^{27}\text{Al-NMR}$  spectrum (78.22 MHz, 298 K,  $\text{CD}_3\text{CN}/o\text{-DFB}$ ) of  $[\text{Li}(\text{DMC})_2][f-a]$ .

The signal at  $\delta^{27}\text{Al} = 34.2$  ppm results from an unidentified impurity.

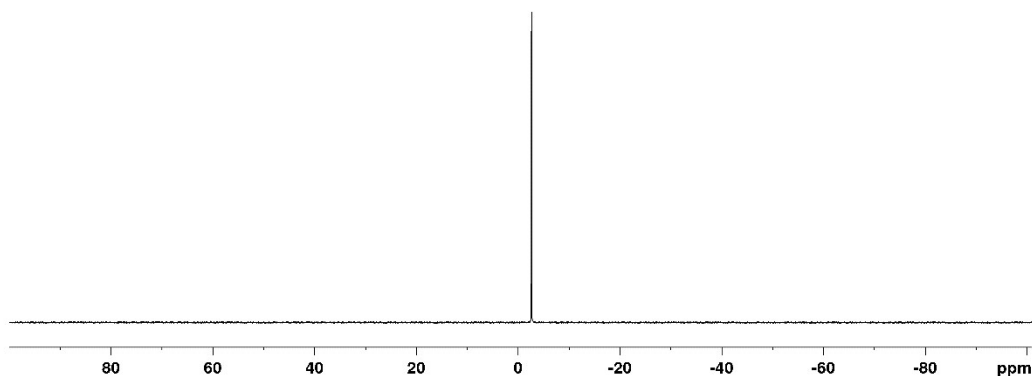

Figure S- 21:  $^7\text{Li}$ -NMR spectrum (116.66 MHz, 298 K,  $\text{CD}_3\text{CN}/o\text{-DFB}$ ) of  $[\text{Li}(\text{DMC})_2][f\text{-al}]$ .

### Synthesis of $\text{K}[f\text{-al}]$

$\text{Me}_3\text{Si-F-Al}(\text{OR}^{\text{F}})_3$  (995 mg, 1.21 mmol) and  $\text{KPF}_6$  (462 mg, 2.51 mmol, 2.1 eq.) were weighed into a Schlenk vessel equipped with a bubbler and dissolved in  $o\text{-DFB}$  (5 ml). The mixture was heated to  $60^\circ\text{C}$ , which led to gas evolution. After 9 h solvent was slowly removed in vacuo at  $60^\circ\text{C}$ . The remaining colorless powder (779 mg raw yield) contained residual  $\text{KPF}_6$ . Further purification was achieved by extraction of the solid with  $o\text{-DFB}$  (4 x 2 ml). After removal of the solvent the product was obtained as a colorless powder (223 mg, 0.28 mmol, 23% raw yield). The  $\text{K}[f\text{-al}]$  obtained this way had a purity of about 80 % and was suitable for IR- and Raman spectroscopy.

NMR spectra were taken in  $\text{Et}_2\text{O}/\text{CD}_2\text{Cl}_2$  in order to dissolve all solids. The basicity of  $\text{Et}_2\text{O}$  led to dissociation of  $[al\text{-}f\text{-al}]^-$  into  $\text{Et}_2\text{O-Al}(\text{OR}^{\text{F}})_3$  and  $[f\text{-al}]^-$ . The ratios of the compounds in solution was calculated accordingly.

**$^{19}\text{F}$ -NMR (282.45 MHz, 298 K,  $\text{CD}_2\text{Cl}_2/\text{Et}_2\text{O}$ ):**  $\delta = -74.9$  (s,  $\text{KOC}(\text{CF}_3)_3$ , 6%),  $-75.9$  (s,  $\text{Et}_2\text{O-Al}(\text{OR}^{\text{F}})_3$ , 4%),  $-76.0$  (s, unknown impurity),  $-76.2$  (d,  $^5J_{\text{F-F}} = 1.8$  Hz,  $[\text{F-Al}(\text{OR}^{\text{F}})_3]^-$ , 78%),  $-76.4$  (t,  $^5J_{\text{F-F}} = 1.0$  Hz,  $[\text{F}_2\text{Al}(\text{OR}^{\text{F}})_2]^-$ , 12%)  $-184.5$  (sext,  $^1J_{\text{Al-F}} = 48$  Hz,  $[\text{F-Al}(\text{OR}^{\text{F}})_3]^-$ ) ppm.

**$^{27}\text{Al}$ -NMR (78.22 MHz, 298 K,  $\text{CD}_2\text{Cl}_2/\text{Et}_2\text{O}$ ):**  $\delta = 40$  (d,  $^1J_{\text{Al-F}} = 48$  Hz,  $[\text{F-Al}(\text{OR}^{\text{F}})_3]^-$ ) ppm.

**ATR-IR (diamond):**  $\tilde{\nu} = 1357$  (vs), 1298 (s), 1243 (w), 1194 (w), 1009 (vs), 967 (w), 817 (vs), 771 (vs), 756 (vs), 725 (w), 563 (vs), 536 (s), 443 (s), 391 (s).

**FT-Raman:**  $\tilde{\nu} = 2937$  (13), 2909 (13), 2757 (13), 1338 (13), 1311 (13), 1273 (25), 1251 (25), 1230 (13), 817 (38), 771 (100), 753 (50), 735 (38), 572 (25), 539 (63), 429 (13), 367 (25), 327 (100), 298 (25), 258 (13), 227 (13).

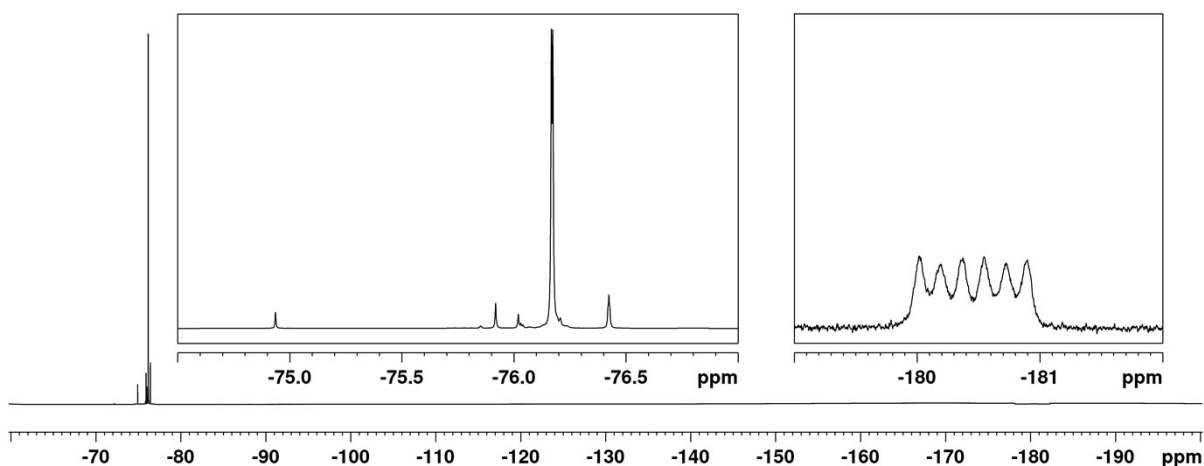

Figure S- 22:  $^{19}\text{F}$ -NMR spectrum (282.45 MHz, 298 K,  $\text{CD}_2\text{Cl}_2/\text{Et}_2\text{O}$ ) of  $\text{K}[\text{f-al}]$ .

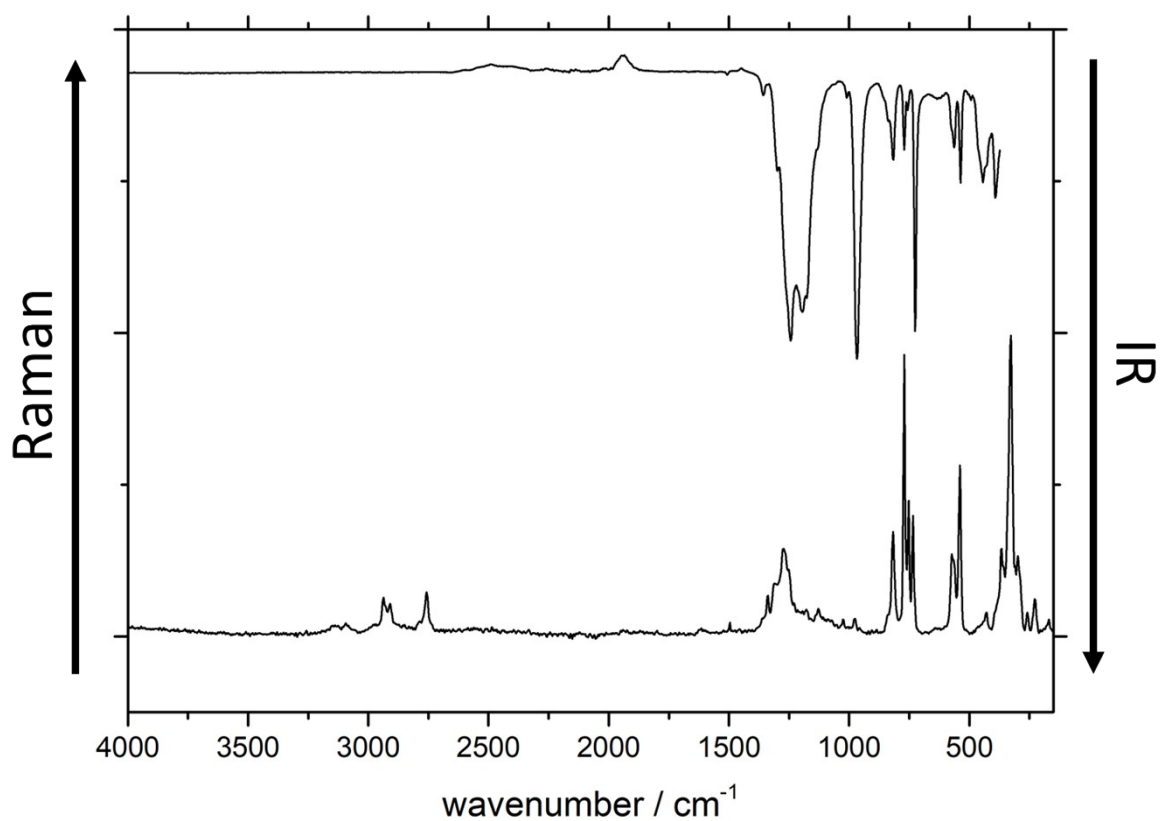

Figure S- 23: ATR-IR (top) and Raman (bottom) spectra of  $\text{K}[\text{f-al}]$ . The vibrational bands at  $\sim 3000\text{ cm}^{-1}$  are caused by fingerprints inside the Raman spectrometer.

### Synthesis of $\text{K}[\text{al-f-al}]$

$\text{Me}_3\text{Si-F-Al}(\text{OR}^f)_3$  (2.17 g, 2.6 mmol) and  $\text{KPF}_6$  (241 mg, 1.3 mmol, 0.5 eq.) were weighed into a Schlenk vessel equipped with a bubbler and dissolved in *o*-DFB (5 ml). The mixture was heated to  $60^\circ\text{C}$ , which led to gas evolution. After 3 h the gas evolution had stopped and the solvent was slowly removed in vacuo at  $60^\circ\text{C}$ . The product was obtained as a colorless powder (1.78 g, 1.2 mmol, 90 %).

**$^{19}\text{F}$ -NMR (376.54 MHz, 298 K,  $\text{CD}_2\text{Cl}_2/o\text{-DFB}$ ):**  $\delta = -75.5$  (d, 54 F,  $[\text{F}\{\text{Al}(\text{OR}^{\text{F}})_3\}_2]^-$ ),  $-184.5$  (s, 1 F,  $[\text{F}\{\text{Al}(\text{OR}^{\text{F}})_3\}_2]^-$ ) ppm.

**$^{27}\text{Al}$ -NMR (104.27 MHz, 298 K,  $\text{CD}_2\text{Cl}_2/o\text{-DFB}$ ):**  $\delta = 35$  (s, br,  $[\text{F}\{\text{Al}(\text{OR}^{\text{F}})_3\}_2]^-$ ) ppm.

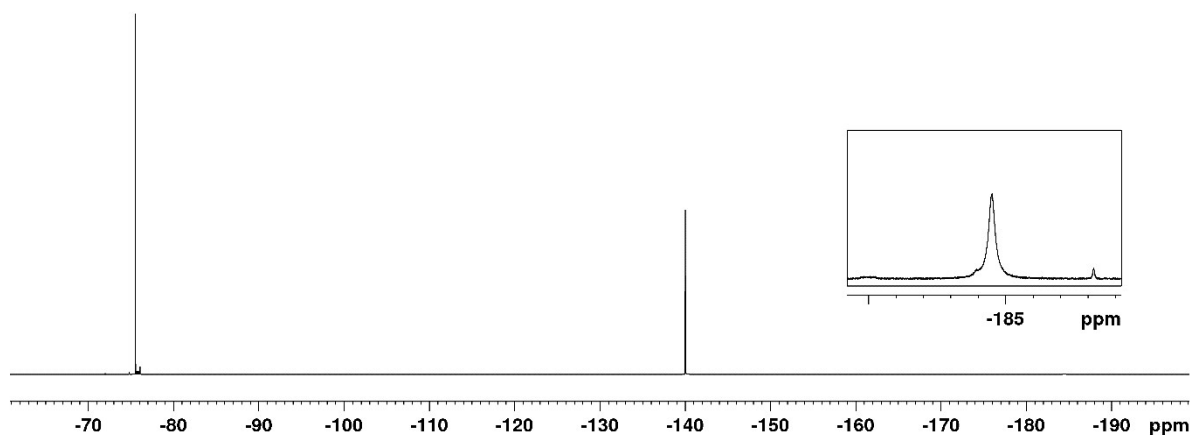

Figure S- 24:  $^{19}\text{F}$ -NMR spectrum (376.54 MHz, 298 K,  $\text{CD}_2\text{Cl}_2/o\text{-DFB}$ ) of  $\text{K}[\text{al-f-al}]$ .

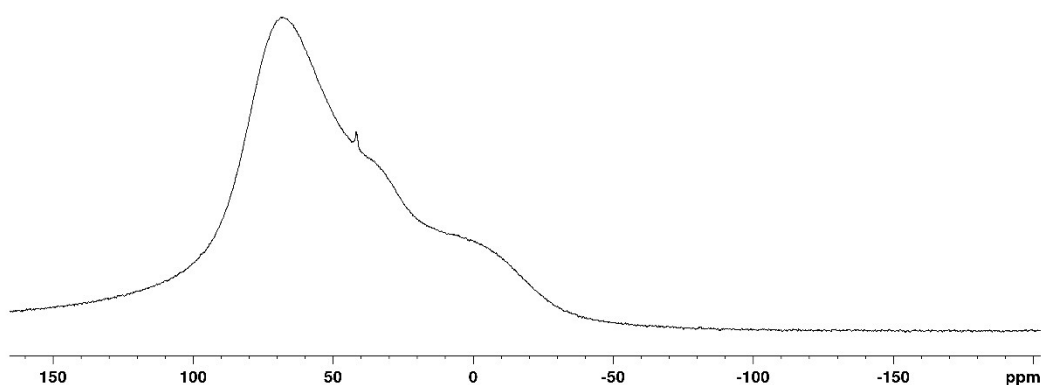

Figure S- 25:  $^{27}\text{Al}$ -NMR spectrum (104.27 MHz, 298 K,  $\text{CD}_2\text{Cl}_2/o\text{-DFB}$ ) of  $\text{K}[\text{al-f-al}]$ .

The sharp signal at  $\delta^{27}\text{Al} = 42$  ppm was generated by small amounts of  $[\text{f-al}]^-$ .

## Synthesis of $\text{Ag}[\text{f-al}]$

a) in  $\text{CH}_2\text{Cl}_2$

In a double bulb vessel connected by a G4 frit plate,  $\text{AgPF}_6$  (320 mg, 1.27 mmol) and  $\text{Me}_3\text{Si-F-Al}(\text{OR}^{\text{F}})_3$  (1.04 g, 1.27 mmol, 1.0 eq.) were weighed in one bulb of the vessel and  $\text{CH}_2\text{Cl}_2$  was condensed onto the solids at 77 K. Then the vessel was equipped with a bubbler in order to allow for evaporation of the evolving  $\text{PF}_5$ . The reaction mixture was thawed under stirring, which led to evolution of gaseous  $\text{PF}_5$ . After stirring for 1 h at room temperature the mixture was allowed to sediment for 5 h during which little dark precipitate formed. The colorless solution was filtered and the solvent was removed in vacuo. The product was obtained as an off-white powder (1.06 g, 1.24 mmol, 98 %). By integration of NMR spectra taken in  $o\text{-DFB}$ , the cation was identified as  $[\text{Ag}(\text{CH}_2\text{Cl}_2)]^+$ .

**$^{19}\text{F}$ -NMR (282.45 MHz,  $\text{CD}_2\text{Cl}_2$ , 298 K):**  $\delta = -75.8$  (s, 27 F,  $[\text{F-Al}(\text{OR}^{\text{F}})_3]^-$ ),  $-189.9$  (m, 1 F,  $[\text{F-Al}(\text{OR}^{\text{F}})_3]^-$ ) ppm.



**<sup>27</sup>Al-NMR (104.27 MHz, CD<sub>2</sub>Cl<sub>2</sub>, 298 K):**  $\delta = 39.8$  (d,  $^1J_{F-Al} = 43$  Hz, 1 Al, [F-Al(OR<sup>F</sup>)<sub>3</sub>]<sup>-</sup>) ppm.

*b) in o-DFB*

Ag[PF<sub>6</sub>] (298 mg, 1.2 mmol) and Me<sub>3</sub>Si-F-Al(OR<sup>F</sup>)<sub>3</sub> (990 mg, 1.2 mmol, 1.0 eq.) were dissolved in C<sub>6</sub>H<sub>4</sub>F<sub>2</sub> (ca. 5 mL) and cooled to -20°C. The mixture was allowed to warm up to r.t. while stirring, concomitant by an evolution of gas (PF<sub>5</sub> and Me<sub>3</sub>SiF). After a few minutes, a slightly yellow solution was obtained. All volatiles were removed in vacuo to afford a colorless powder (798 mg, 1.0 mmol, 84 %, x = 0.2). The composition of this compound is [Ag(o-DFB)<sub>x</sub>][f-al] with x = 0 – 2, depending on the drying time.

**<sup>1</sup>H-NMR (200.13 MHz, CD<sub>2</sub>Cl<sub>2</sub>, 298 K):**  $\delta = 7.27-7.07$  (m, 4 H, [Ag(o-C<sub>6</sub>H<sub>4</sub>F<sub>2</sub>)<sub>x</sub>]<sup>+</sup>) ppm

**<sup>19</sup>F-NMR (188.31 MHz, CD<sub>2</sub>Cl<sub>2</sub>, 298 K):**  $\delta = -75.8$  (d, 27 F,  $^5J_{F,F} = 2$  Hz, [FAl(OR<sup>F</sup>)<sub>3</sub>]<sup>-</sup>), -139.4 (m, 2 F, [Ag(o-C<sub>6</sub>H<sub>4</sub>F<sub>2</sub>)<sub>x</sub>]<sup>+</sup>), -199.0 (m, 1 F, [FAl(OR<sup>F</sup>)<sub>3</sub>]<sup>-</sup>) ppm

**<sup>27</sup>Al-NMR (78.22 MHz, CD<sub>2</sub>Cl<sub>2</sub>, 298 K):**  $\delta = 39.7$  (d,  $^1J_{Al-F} = 45$  Hz, [FAl(OR<sup>F</sup>)<sub>3</sub>]<sup>-</sup>).

*c) in SO<sub>2</sub>*

Me<sub>3</sub>Si-F-Al(OR<sup>F</sup>)<sub>3</sub> (863 mg, 1.05 mmol) and AgPF<sub>6</sub> (270 mg, 1.07 mmol, 1.02 eq.) were weighed into a Schlenk vessel. Then SO<sub>2</sub> (~2 ml) was condensed onto this mixture at -78°C. The Schlenk vessel was equipped with a bubbler in order to remove the evolving PF<sub>5</sub> and the reaction solution was stirred at -20°C. The reaction solution was allowed to reach -5°C within 1.5 h, then the solvent was removed in vacuo. The product was obtained as colorless powder (888 mg, 1.03 mmol, 98 %).

**<sup>19</sup>F-NMR (282.45 MHz, CD<sub>2</sub>Cl<sub>2</sub>, 298 K):**  $\delta = -75.8$  (s, 27 F, [F-Al(OR<sup>F</sup>)<sub>3</sub>]<sup>-</sup>), -189.9 (m, 1 F, [F-Al(OR<sup>F</sup>)<sub>3</sub>]) ppm.

**<sup>27</sup>Al-NMR (104.27 MHz, CD<sub>2</sub>Cl<sub>2</sub>, 298 K):**  $\delta = 39.8$  (d,  $^1J_{F-Al} = 43$  Hz, 1 Al, [F-Al(OR<sup>F</sup>)<sub>3</sub>]<sup>-</sup>) ppm.

**ATR-IR (diamond):**  $\tilde{\nu} = 1359$  (vs), 1300 (vs), 1244 (w), 1209 (m), 1173 (m), 1133 (vs), 1074 (vs), 973 (w), 968 (w), 857 (vs), 807 (vs), 761 (s), 726 (w), 577 (vs), 565 (vs), 556 (vs), 537 (s), 473 (vs), 434 (vs), 415 (vs), 394 (s).

**FT-Raman:**  $\tilde{\nu} = 1331$  (20), 1267 (40), 812 (40), 762 (100), 723 (20), 573 (20), 540 (60), 367 (20), 328 (80), 300 (20), 231 (20).

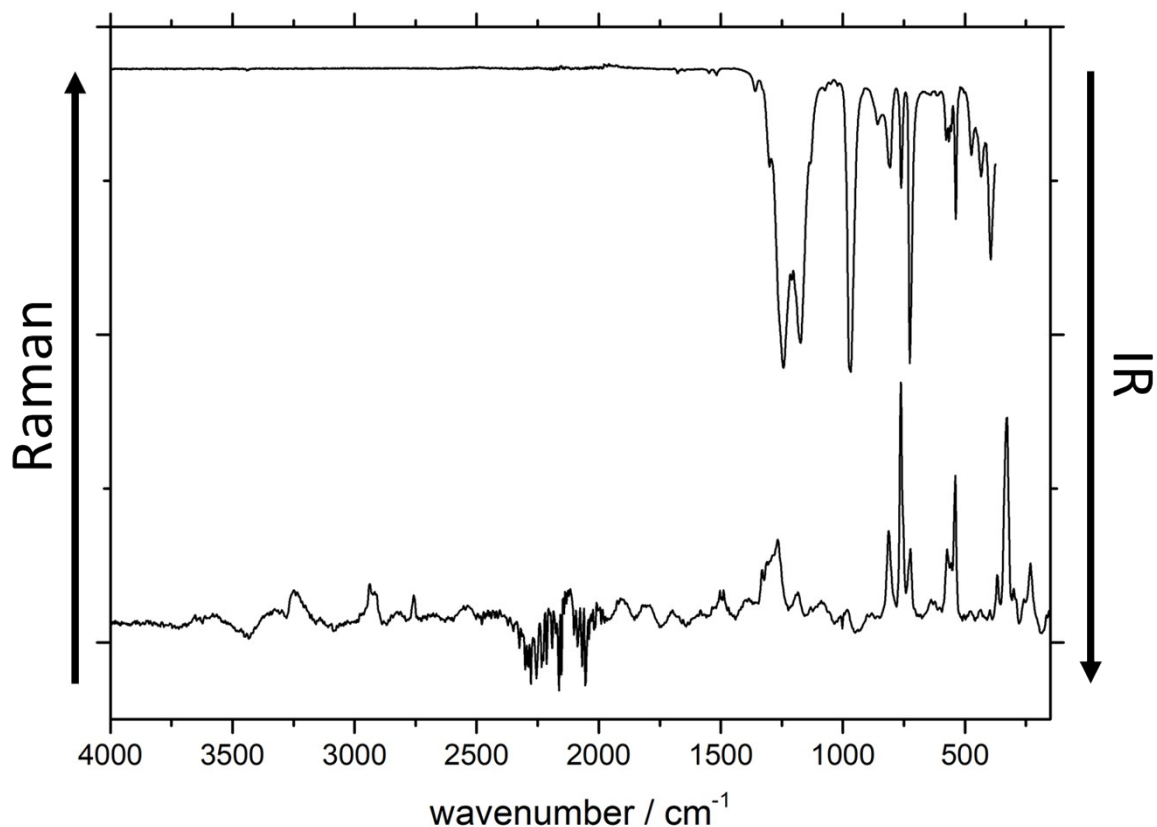

Figure S- 26: ATR-IR (top) and Raman (bottom) spectra of Ag[f-al]. The vibrational bands at  $\sim 3000\text{ cm}^{-1}$  are caused by fingerprints inside the Raman spectrometer.

### Synthesis of Ag[al-f-al]

#### a) in $\text{CH}_2\text{Cl}_2$

In a double bulb vessel connected by a G4 frit plate,  $\text{AgPF}_6$  (318 mg, 1.26 mmol) and  $\text{Me}_3\text{Si-F-Al}(\text{OR}^{\text{F}})_3$  (2.07 g, 2.51 mmol, 2.0 eq.) were weighed in one bulb of the vessel and  $\text{CH}_2\text{Cl}_2$  was condensed onto the solids at 77 K. Then the vessel was equipped with a bubbler in order to allow for evaporation of the evolving  $\text{PF}_5$ . The reaction mixture was thawed under stirring, which led to evolution of gaseous  $\text{PF}_5$ . After stirring for 1 h at room temperature the mixture was allowed to sediment for 5 h during which little dark precipitate formed. The colorless solution was filtered and the solvent was removed in vacuo. The product was obtained as a fine white powder (1.95 g, 1.22 mmol, 97 %). By integration of NMR spectra taken in *o*-DFB, the cation was identified as  $[\text{Ag}(\text{CH}_2\text{Cl}_2)_3]^+$ .

$^{19}\text{F-NMR}$  (282.45 MHz,  $\text{CD}_2\text{Cl}_2$ , 298 K):  $\delta = -75.8$  (s, 54 F,  $[\text{F}\{\text{Al}(\text{OR}^{\text{F}})_3\}_2]^-$ ),  $-184.8$  (s, br, 1 F,  $[\text{F}\{\text{Al}(\text{OR}^{\text{F}})_3\}_2]^-$ ) ppm.

$^{27}\text{Al-NMR}$  (104.27 MHz,  $\text{CD}_2\text{Cl}_2$ , 298 K):  $\delta = \text{ca. } 37.1$  (s, br, 2 Al,  $[\text{F}\{\text{Al}(\text{OR}^{\text{F}})_3\}_2]^-$ ) ppm.

#### b) in *o*-DFB

Ag[PF<sub>6</sub>] (637 mg, 2.5 mmol) and Me<sub>3</sub>Si-F-Al(OR<sup>F</sup>)<sub>3</sub> (4.33 g, 5.2 mmol, 2.1 eq.) were dissolved in C<sub>6</sub>H<sub>4</sub>F<sub>2</sub> (ca. 5 mL) and cooled to -20°C. The mixture was allowed to warm up to r.t. while stirring, concomitant by an evolution of gas (PF<sub>5</sub> and Me<sub>3</sub>SiF). After a few minutes, a colorless solution was obtained. All volatiles were removed in vacuo to afford a colorless powder ([Ag(o-DFB)<sub>2</sub>][al-f-al], 4.32 g, 2.4 mmol, 96 %). Alternatively, the concentrated solution can be crystallized from layering with *n*-pentane to give colorless crystals of [Ag(o-DFB)<sub>3</sub>][al-f-al].

**<sup>1</sup>H-NMR (300.18 MHz, CD<sub>2</sub>Cl<sub>2</sub>, 298 K):** δ = 7.26-7.08 (m, 8 H, [Ag(o-C<sub>6</sub>H<sub>4</sub>F<sub>2</sub>)<sub>2</sub>]<sup>+</sup>) ppm

**<sup>19</sup>F-NMR (282.45 MHz, CD<sub>2</sub>Cl<sub>2</sub>, 298 K):** δ = -75.8 (s, 54 F, [F{Al(OR<sup>F</sup>)<sub>3</sub>]<sub>2</sub>]<sup>-</sup>), -139.4 (m, 4 F, [Ag(o-C<sub>6</sub>H<sub>4</sub>F<sub>2</sub>)<sub>2</sub>]<sup>+</sup>), -184.9 (s, br, 1 F, [F{Al(OR<sup>F</sup>)<sub>3</sub>]<sub>2</sub>]<sup>-</sup>) ppm.

**<sup>27</sup>Al-NMR (104.27 MHz, CD<sub>2</sub>Cl<sub>2</sub>, 298 K):** δ = ca. 37.1 (s, br, 2 Al, [F{Al(OR<sup>F</sup>)<sub>3</sub>]<sub>2</sub>]<sup>-</sup>) ppm.

*c) in SO<sub>2</sub>*

In a double bulb vessel connected by a G4 frit plate and equipped with a bubbler, AgPF<sub>6</sub> (231 mg, 0.91 mmol) and Me<sub>3</sub>Si-F-Al(OR<sup>F</sup>)<sub>3</sub> (1.51 g, 1.83 mmol, 2.0 eq.) were weighed in one bulb of the vessel. SO<sub>2</sub> was condensed onto the solids at -78°C. The turbid solution was then stirred for 2 h at -20°C, then for 10 min at 0°C. During this time, the evolution of PF<sub>5</sub> was observed. The solution was filtered and the residue was extracted two more times with SO<sub>2</sub>. After removal of the solvent in vacuo the product was obtained as a solvent-free colorless powder (1.37 g, 0.86 mmol, 95 %).

**<sup>19</sup>F-NMR (376.54 MHz, 298 K, CD<sub>2</sub>Cl<sub>2</sub>):** δ = -75.8 (s, 54 F, [F{Al(OR<sup>F</sup>)<sub>3</sub>]<sub>2</sub>]<sup>-</sup>), -184.9 (s, 1F, [F{Al(OR<sup>F</sup>)<sub>3</sub>]<sub>2</sub>]<sup>-</sup>) ppm.

**<sup>27</sup>Al-NMR (104.27 MHz, 298 K, CD<sub>2</sub>Cl<sub>2</sub>):** δ = 35.0 (s, br, [F{Al(OR<sup>F</sup>)<sub>3</sub>]<sub>2</sub>]<sup>-</sup>) ppm.

**ATR-IR (diamond):**  $\tilde{\nu}$  = 1353 (vs), 1300 (vs), 1243 (m), 1211 (m), 1176 (s), 970 (m), 862 (vs), 760 (vs), 726 (m), 695 (vs), 638 (vs), 569 (vs), 537 (s), 473 (vs), 450 (s), 382 (vs).

**FT-Raman:**  $\tilde{\nu}$  = 1305 (5), 1279 (10), 816 (30), 753 (100), 696 (25), 572 (20), 539 (30), 367 (15), 325 (45), 307 (40), 292 (15), 233 (10).

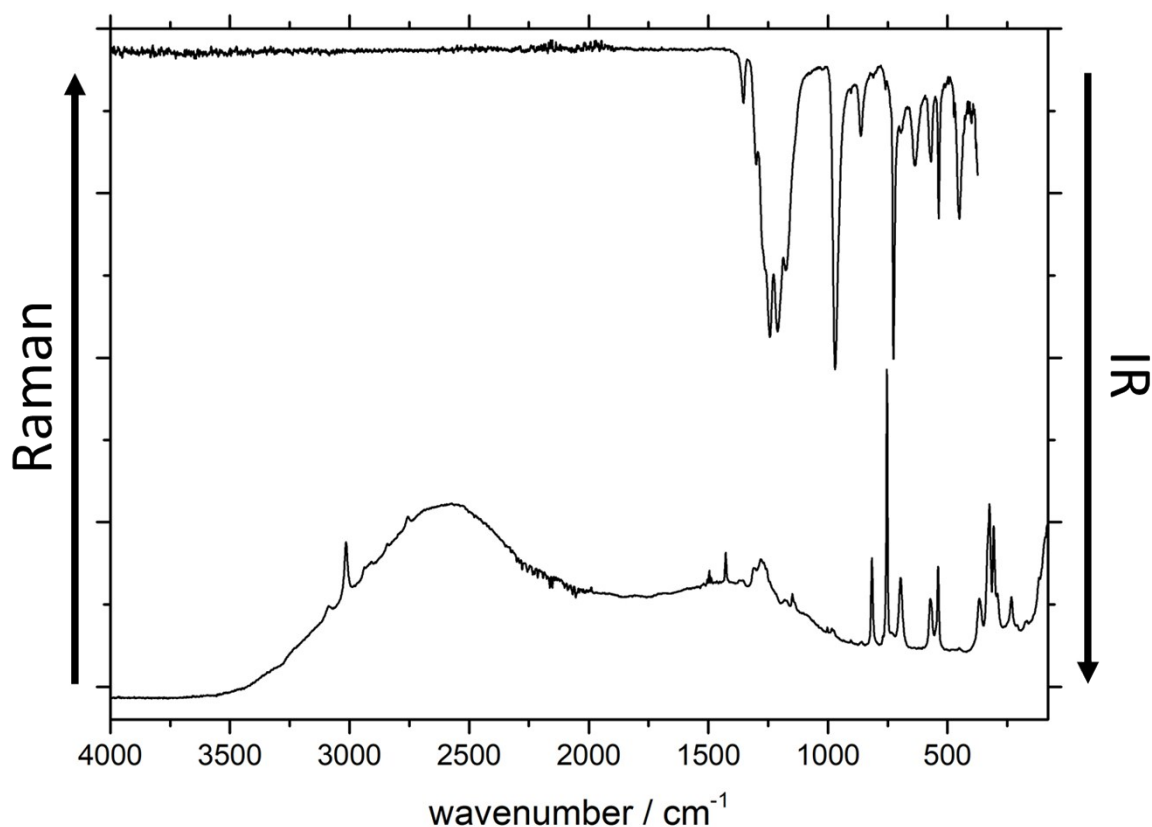

Figure S- 27: ATR-IR (top) and Raman (bottom) spectra of Ag[*al-f-al*] containing small amounts of *o*DFB. The vibrational bands at  $\sim 3000\text{ cm}^{-1}$  are caused by fingerprints inside the Raman spectrometer.

### Synthesis of [NO][*f-al*]

[NO][PF<sub>6</sub>] (106 mg, 0.61 mmol) and Me<sub>3</sub>Si-F-Al(OR<sup>F</sup>)<sub>3</sub> (500 mg, 0.61 mmol, 1.0 eq.) were weighed in a Schlenk vessel and SO<sub>2</sub> was condensed onto the solids at  $-78^{\circ}\text{C}$ . The Schlenk vessel was equipped with a bubbler in order to remove the evolving PF<sub>5</sub> and the reaction solution was stirred at  $-20^{\circ}\text{C}$ . The reaction solution was allowed to reach  $-5^{\circ}\text{C}$  within 1 h, then the solvent was removed in vacuo. The product was obtained as colorless powder (447 mg, 0.57 mmol, 94 %).

**<sup>19</sup>F-NMR (376.54 MHz, SO<sub>2</sub>, 298 K):**  $\delta = -75.8$  (s, 27 F, [F-Al(OR<sup>F</sup>)<sub>3</sub>]<sup>-</sup>),  $-142.0$  (sext, 1 F, [F-Al(OR<sup>F</sup>)<sub>3</sub>]<sup>-</sup>) ppm.

**<sup>27</sup>Al-NMR (104.27 MHz, SO<sub>2</sub>, 298 K):**  $\delta = 41.1$  (d,  $^1J_{\text{F-Al}} = 44$  Hz, 1 Al, [F-Al(OR<sup>F</sup>)<sub>3</sub>]<sup>-</sup>) ppm.

**ATR-IR (diamond):**  $\tilde{\nu} = 1355$  (vs), 1300 (s), 1243 (w), 1205 (w), 1183 (w), 968 (w), 821 (vs), 766 (vs), 725 (w), 646 (vs), 573 (vs), 561 (vs), 536 (s), 445 (s), 387 (s).

**FT-Raman:**  $\tilde{\nu} = 2313$  (86), 1313 (14), 1266 (29), 816 (29), 768 (71), 753 (57), 731 (29), 573 (29), 539 (57), 446 (14), 367 (29), 326 (100), 298 (14), 231 (14), 169 (14).

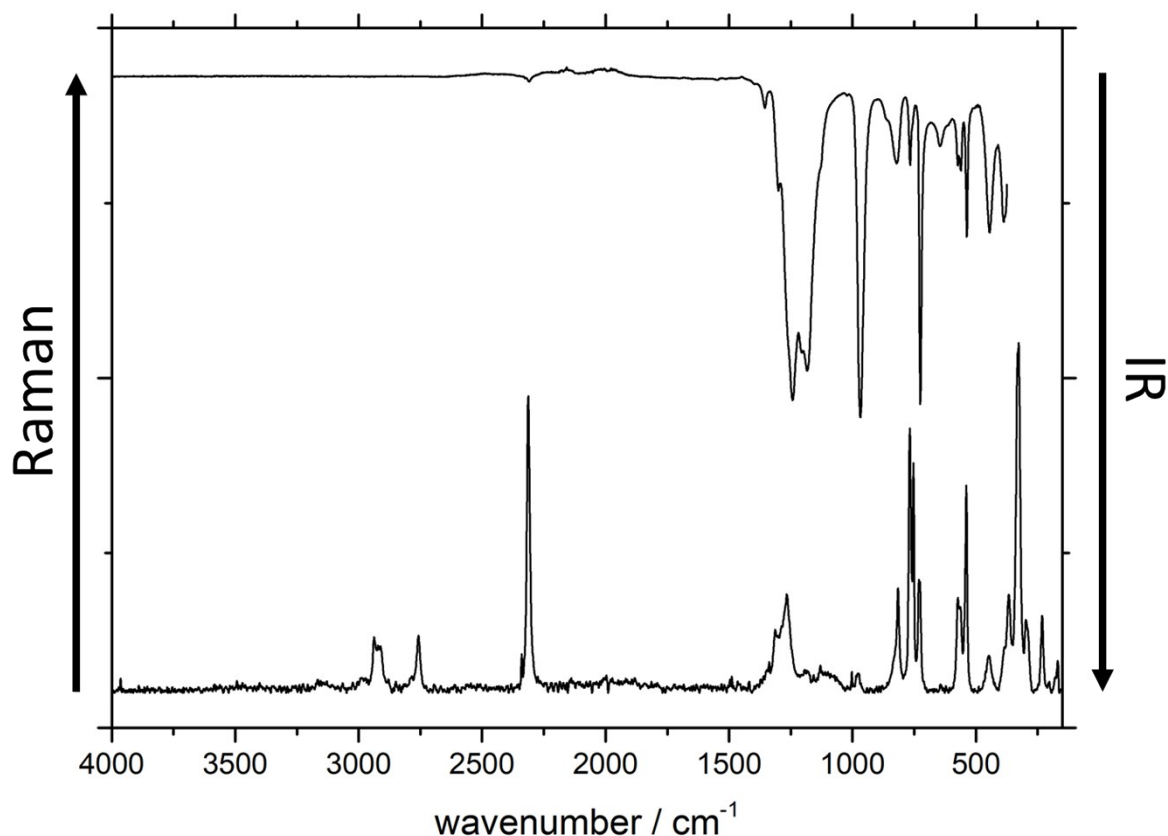

Figure S- 28: ATR-IR (top) and Raman (bottom) spectra of  $[\text{NO}][f\text{-al}]$ . The vibrational bands at  $\sim 3000\text{ cm}^{-1}$  are caused by fingerprints inside the Raman spectrometer.

### Synthesis of $[\text{NO}][al\text{-}f\text{-}al]$

A double-Schlenk flask was equipped inside the glove box with  $\text{Me}_3\text{Si-F-Al}(\text{OR}^{\text{F}})_3$  (504 mg, 0.61 mmol, 2.0 eq.) and  $[\text{NO}][\text{PF}_6]$  (56 mg, 0.32 mmol, 1.0 eq.).  $\text{SO}_2$  (ca. 3 mL) was then condensed onto the reaction mixture at  $-196^\circ\text{C}$  and the flask was equipped with a bubbler. The vessel was then carefully vented with Ar and the bubbler was opened towards the fume hood while the reaction mixture was stirred at  $-35^\circ\text{C}$  for 60 min (evolution of  $\text{PF}_5$ !). Then, the volatiles were removed at  $0^\circ\text{C}$  and a white solid was obtained which was further dried in vacuo (440 mg, 0.29 mmol, 88 %).

**$^{19}\text{F}$ -NMR (376.54 MHz,  $\text{C}_6\text{H}_2\text{F}_4$ , 298 K):**  $\delta = -75.8$  (s, 54 F,  $[\text{F}\{\text{Al}(\text{OR}^{\text{F}})_3\}_2]^-$ ),  $-184.4$  (s, 1 F,  $[\text{F}\{\text{Al}(\text{OR}^{\text{F}})_3\}_2]^-$ ) ppm.

**$^{27}\text{Al}$ -NMR (104.27 MHz,  $\text{C}_6\text{H}_2\text{F}_4$ , 298 K):**  $\delta = 36$  (s, br, 2 Al,  $[\text{F}\{\text{Al}(\text{OR}^{\text{F}})_3\}_2]^-$ ) ppm.

**ATR-IR (diamond):**  $\tilde{\nu} = 1354$  (vw), 1301 (w), 1247 (vs), 1212 (vs), 1074 (vw), 968 (vs), 862 (vw), 760 (vw), 751 (vw), 726 (vs), 640 (w), 569 (w).

**FT-Raman:**  $\tilde{\nu} = 2340$  (17), 1319 (11), 1271 (11), 1253 (13), 979 (4), 815 (36), 753 (100), 571 (26), 539 (34), 365 (23), 326 (57), 293 (17), 235 (13).

## Synthesis of $[\text{Ph}_3\text{C}][f\text{-al}]$

In a Schlenk vessel equipped with a bubbler,  $[\text{Ph}_3\text{C}][\text{PF}_6]$  (451 mg, 1.16 mmol) and  $\text{Me}_3\text{Si-F-Al}(\text{OR}^f)_3$  (1.00 g, 1.21 mmol, 1.04 eq.) were weighed in one bulb of the vessel and  $\text{CH}_2\text{Cl}_2$  (5 ml) was added onto the solids. Immediately the evolution of a gas ( $\text{PF}_5$  and  $\text{Me}_3\text{SiF}$ ) was observed. The reaction mixture was stirred for 1 h at rt. After removal of the solvent in vacuo the product was obtained as a yellow powder (1.10 g, 1.10 mmol, 95 %).

**$^1\text{H-NMR}$  (300.18 MHz,  $\text{CD}_2\text{Cl}_2$ , 298 K):**  $\delta$  = 8.33 (m, 3 H,  $[\text{Ph}_3\text{C}]^+$ ), 7.94 (m, 6 H,  $[\text{Ph}_3\text{C}]^+$ ), 7.72 (m, 6 H,  $[\text{Ph}_3\text{C}]^+$ ) ppm

**$^{13}\text{C-NMR}$  (75.48 MHz, 298 K,  $\text{CD}_2\text{Cl}_2$ ):**  $\delta$  = 130.9 ( $[\text{Ph}_3\text{C}]^+$ ), 140.0 ( $[\text{Ph}_3\text{C}]^+$ ), 142.9 ( $[\text{Ph}_3\text{C}]^+$ ), 143.7 ( $[\text{Ph}_3\text{C}]^+$ ), 210.7 ( $[\text{Ph}_3\text{C}]^+$ ) ppm.

**$^{19}\text{F-NMR}$  (282.45 MHz,  $\text{CD}_2\text{Cl}_2$ , 298 K):**  $\delta$  = -75.8 (d,  $^5J_{\text{F-F}} = 1.7$  Hz, 27 F,  $[\text{F-Al}(\text{OR}^f)_3]^-$ ), -186.1 (m, br, 1 F,  $[\text{F-Al}(\text{OR}^f)_3]^-$ ) ppm.

**$^{27}\text{Al-NMR}$  (104.27 MHz,  $\text{CD}_2\text{Cl}_2$ , 298 K):**  $\delta$  = 41.1 (s, 1 Al,  $[\text{F-Al}(\text{OR}^f)_3]^-$ ) ppm.

**ATR-IR (diamond):**  $\tilde{\nu}$  = 1585 (m), 1485 (s), 1452 (s), 1357 (m), 1295 (m), 1265 (w), 1238 (vw), 1210 (vw), 1187 (w), 1167 (w), 1030 (vs), 997 (s), 967 (vw), 841 (s), 825 (m), 806 (s), 766 (m), 725 (w), 699 (w), 661 (vs), 623 (s), 609 (s), 559 (s), 536 (m), 495 (vs), 446 (m), 402 (m).

## Synthesis of $[\text{Ph}_3\text{C}][al\text{-}f\text{-al}]$

$[\text{Ph}_3\text{C}][\text{PF}_6]$  (1.52 g, 3.91 mmol) and  $\text{Me}_3\text{Si-F-Al}(\text{OR}^f)_3$  (6.70 g, 8.13 mmol, 2.1 eq.) were weighed into a Schlenk vessel equipped with a bubbler. After addition of *o*-DFB (10 ml), immediately a fierce evolution of  $\text{PF}_5$  was observed, which was finished after several seconds. After stirring for 1 h at room temperature, the solvent was slowly removed in vacuo. The product was obtained as a fine yellow powder (5.94 g, 3.44 mmol, 88 %).

**$^1\text{H-NMR}$  (300.18 MHz, 298 K,  $\text{CD}_2\text{Cl}_2$ ):**  $\delta$  = 7.71 (m, 2 H,  $[\text{Ph}_3\text{C}]^+$ ), 7.94 (m, 2 H,  $[\text{Ph}_3\text{C}]^+$ ), 8.33 (m, 1 H,  $[\text{Ph}_3\text{C}]^+$ ) ppm.

**$^{13}\text{C-NMR}$  (75.48 MHz, 298 K,  $\text{CD}_2\text{Cl}_2$ ):**  $\delta$  = 130.9 ( $[\text{Ph}_3\text{C}]^+$ ), 140.0 ( $[\text{Ph}_3\text{C}]^+$ ), 142.8 ( $[\text{Ph}_3\text{C}]^+$ ), 143.9 ( $[\text{Ph}_3\text{C}]^+$ ), 210.8 ( $[\text{Ph}_3\text{C}]^+$ ) ppm.

**$^{19}\text{F-NMR}$  (282.45 MHz, 298 K,  $\text{CD}_2\text{Cl}_2$ ):**  $\delta$  = -75.8 (d, 54 F,  $^5J_{\text{F-F}} = 0.5$  Hz,  $[\text{F}\{\text{Al}(\text{OR}^f)_3\}_2]^-$ ), -184.9 (s, 1 F,  $[\text{F}\{\text{Al}(\text{OR}^f)_3\}_2]^-$ ) ppm.

**$^{27}\text{Al-NMR}$  (78.22 MHz, 298 K,  $\text{CD}_2\text{Cl}_2$ ):**  $\delta$  = 37 (s, br,  $[\text{F}\{\text{Al}(\text{OR}^f)_3\}_2]^-$ ) ppm.

## Investigations on the $\text{Al}(\text{OR}^f)_3$ exchange reactions of $[al\text{-}f\text{-al}]^-$ and $[f\text{-al}]^-$

Non-stoichiometric amounts of  $\text{Ag}[f\text{-al}]$  and  $\text{Ag}[al\text{-}f\text{-al}]$  were filled into an NMR tube and dissolved in *o*-DFB and  $\text{CD}_2\text{Cl}_2$  (1:1). For both anions the  $^1J_{\text{Al-F}}$  couplings are resolved in the NMR spectra, proving the absence of an exchange of  $\text{Al}(\text{OR}^f)_3$  between these anions. Al decoupling of the  $^{19}\text{F}$  NMR spectrum leads to sharp signals of the Al-F atom for both anions.

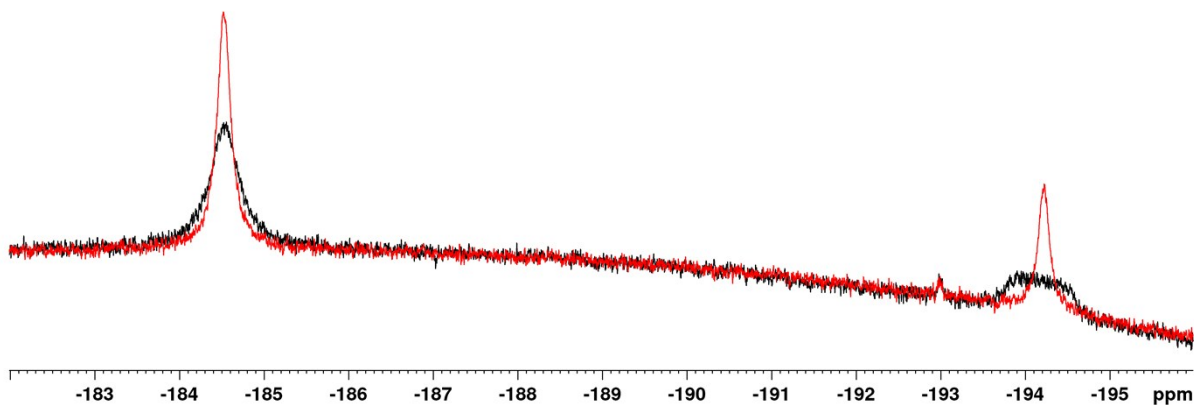

Figure S- 29:  $^{19}\text{F}$ -NMR spectrum (282.45 MHz, 298 K, *o*-DFB/ $\text{CD}_2\text{Cl}_2$ ) in the (Al-)F region of the mixture of  $\text{Ag}[f\text{-}al]$  and  $\text{Ag}[al\text{-}f\text{-}al]$ ; black)  $^{19}\text{F}$  NMR spectrum; red)  $^{19}\text{F}\{^{27}\text{Al}\}$  NMR spectrum.

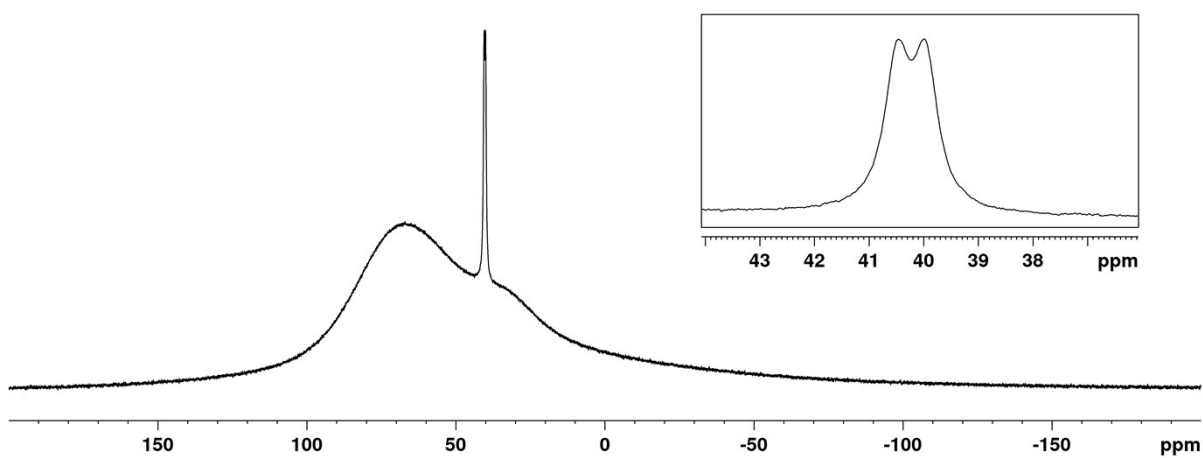

Figure S- 30:  $^{27}\text{Al}$ -NMR spectrum (78.22 MHz, 298 K, *o*-DFB/ $\text{CD}_2\text{Cl}_2$ ) of the mixture of  $\text{Ag}[f\text{-}al]$  and  $\text{Ag}[al\text{-}f\text{-}al]$ .

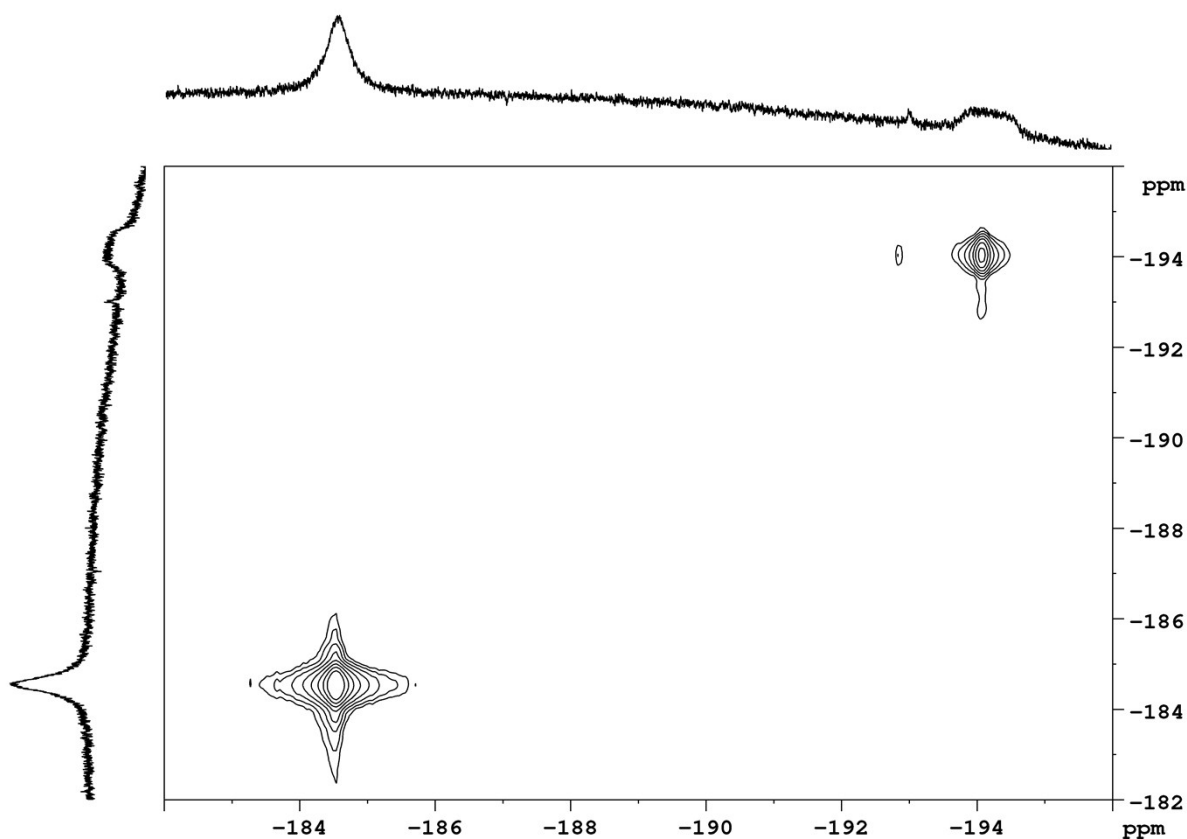

Figure S- 31:  $^{19}\text{F}$ ,  $^{19}\text{F}$  EXSY NMR spectrum (282.45 MHz, 298 K, *o*-DFB/ $\text{CD}_2\text{Cl}_2$  mixing time: 1.6 s) of the mixture of  $\text{Ag}[f\text{-}a]$  and  $\text{Ag}[al\text{-}f\text{-}a]$ .

## Reactions of $\text{Me}_3\text{Si-F-Al}(\text{OR}^f)_3$ with $[\text{Cat}][\text{BF}_4]$

a)  $[\text{Cat}]^+ = \text{K}^+$

$\text{Me}_3\text{Si-F-Al}(\text{OR}^f)_3$  (2.17 g, 2.6 mmol) and  $\text{KBF}_4$  (165 mg, 1.3 mmol, 0.5 eq.) were weighed into a Schlenk vessel equipped with a bubbler and dissolved in *o*-DFB (10 ml). The solution was heated to  $80^\circ\text{C}$  for 2 h, which led to formation of a colorless precipitate.

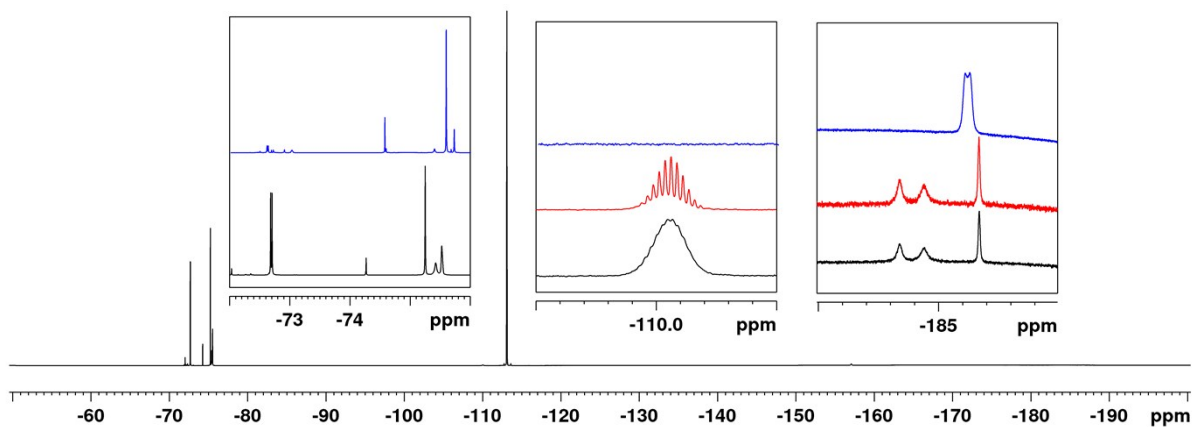

Figure S- 32:  $^{19}\text{F}$ -NMR spectrum (282.45 MHz, 298 K) of the reaction of  $\text{Me}_3\text{Si-F-Al}(\text{OR}^f)_3$  with  $\text{KBF}_4$ ; black) in  $\text{C}_6\text{H}_5\text{F}/\text{CDCl}_3$ ; red)  $^{19}\text{F}\{^{11}\text{B}\}$  NMR spectrum in  $\text{C}_6\text{H}_5\text{F}/\text{CDCl}_3$ ; blue) in  $\text{C}_6\text{H}_5\text{F}/\text{Acetone-d}_6$ .



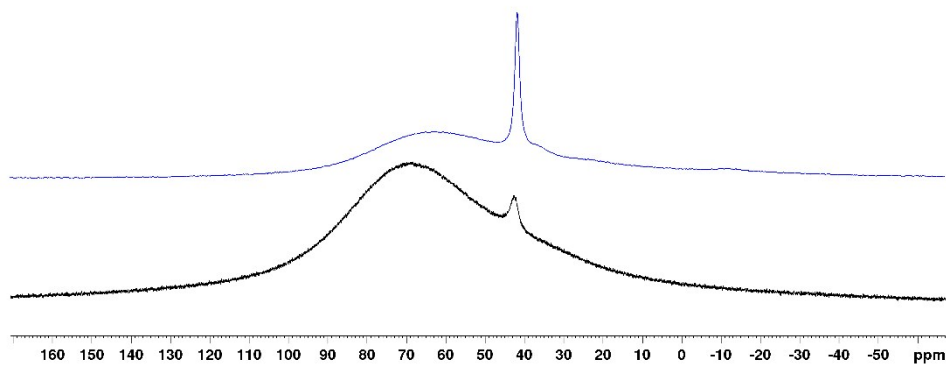

Figure S- 33:  $^{27}\text{Al}$ -NMR spectrum (78.22 MHz, 298 K) of the reaction of  $\text{Me}_3\text{Si-F-Al}(\text{OR}^{\text{F}})_3$  with  $\text{KBF}_4$ ; black) in  $\text{C}_6\text{H}_5\text{F}/\text{CDCl}_3$ ; blue) in  $\text{C}_6\text{H}_5\text{F}/\text{Acetone-d}_6$ .

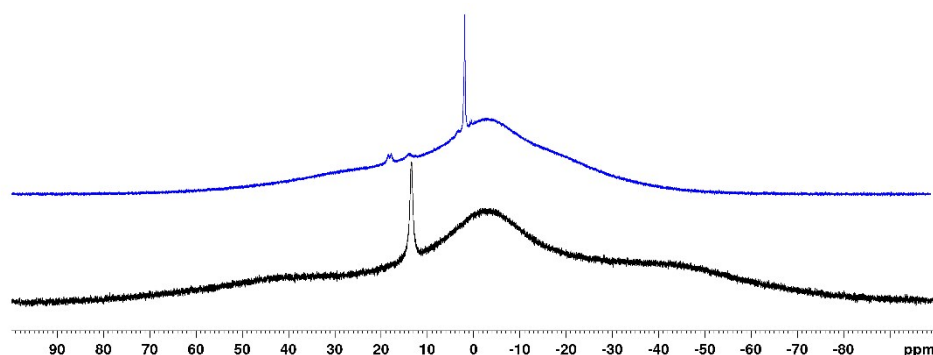

Figure S- 34:  $^{11}\text{B}$ -NMR spectrum (96.31 MHz, 298 K) of the reaction of  $\text{Me}_3\text{Si-F-Al}(\text{OR}^{\text{F}})_3$  with  $\text{KBF}_4$ ; black) in  $\text{C}_6\text{H}_5\text{F}/\text{CDCl}_3$ ; blue) in  $\text{C}_6\text{H}_5\text{F}/\text{Acetone-d}_6$ .

b)  $[\text{Cat}]^+ = \text{Ag}^+$

$\text{Me}_3\text{Si-F-Al}(\text{OR}^{\text{F}})_3$  (2.17 g, 2.6 mmol) and  $\text{AgBF}_4$  (255 mg, 1.3 mmol, 0.5 eq.) were weighed into a Schlenk vessel equipped with a bubbler and dissolved in PhF (5 ml). The solution was stirred for 2 days and then stored at  $-30^\circ\text{C}$ . From the reaction solution single crystals of  $[\text{Ag}(\text{PhF})_2][\text{F}_2\text{B}(\text{OR}^{\text{F}})_2]$  could be obtained.

## Reaction of $\text{Ag}[\text{al-f-al}]$ with $\text{R}_3\text{SiX}$

a)  $\text{Ph}_3\text{SiCl}$

$\text{Ag}[\text{al-f-al}]$  (151 mg, 0.09 mmol) and  $\text{Ph}_3\text{SiCl}$  (29 mg, 0.10 mmol, 1.0 eq.) were weighed into a Schlenk vessel and were dissolved in *o*-DFB (2 ml). The solution was stirred overnight, which led to formation of small amounts of a black precipitate. NMR spectra mainly showed signals of the starting materials. The  $^{29}\text{Si}$  NMR Signal of  $\text{Ph}_3\text{SiCl}$  is shifted by 0.5 ppm compared to pure  $\text{Ph}_3\text{SiCl}$  ( $\delta^{29}\text{Si} = 1.2$  ppm), probably due to adduct formation.

$^1\text{H}$ -NMR (400.17 MHz, 298 K, *o*-DFB/Toluene- $d_8$ ):  $\delta = 7.60$ -7.64 (m, 15H,  $\text{Ph}_3\text{SiCl}$ ) ppm.

$^{19}\text{F}$ -NMR (282.45 MHz, 298 K, *o*-DFB/Toluene- $d_8$ ):  $\delta = -75.2$  (s, 54F,  $[(\text{OR}^{\text{F}})_3\text{Al-F-Al}(\text{OR}^{\text{F}})_3]^-$ ),  $-169.2$  (s, 1F,  $\text{Ph}_3\text{SiF}$ ),  $-184.3$  (s, 1F,  $[\text{al-f-al}]^-$ ) ppm.

$^{29}\text{Si}$ -NMR (79.5 MHz, 298 K, *o*-DFB/Toluene- $d_8$ ):  $\delta = 1.7$  (s,  $\text{Ph}_3\text{SiCl}$ ),  $-3.9$  (s,  $\text{Ph}_3\text{SiF}$ ) ppm.

b) *t*Bu<sub>3</sub>SiBr

Ag[*al-f-al*] (151 mg, 0.09 mmol) and *t*Bu<sub>3</sub>SiBr (56 mg, 0.2 mmol, 2.0 Äq.) were weighed into a Schlenk vessel and cooled with liquid N<sub>2</sub>. After addition of CH<sub>2</sub>Cl<sub>2</sub> the reaction solution was warmed to -40°C and stirred overnight, which led to formation of small amounts of a black precipitate. NMR spectra of the reaction solution mainly showed signals of the starting materials. The <sup>29</sup>Si NMR Signal of *t*Bu<sub>3</sub>SiBr is shifted by 2.0 ppm compared to the literature ( $\delta^{29}\text{Si} = 41.3$  ppm), probably due to adduct formation.

Storage of the reaction solution at -40°C yielded needle-shaped crystals of [Ag(*t*Bu<sub>3</sub>SiBr)<sub>2</sub>(CH<sub>2</sub>Cl<sub>2</sub>)<sub>2</sub>][*al-f-al*].

**<sup>1</sup>H-NMR (300.18 MHz, 298 K, CD<sub>2</sub>Cl<sub>2</sub>):**  $\delta = 1.25$  (s, 27H, *t*Bu<sub>3</sub>SiBr) ppm.

**<sup>13</sup>C-NMR (75.48 MHz, 298 K, CD<sub>2</sub>Cl<sub>2</sub>):**  $\delta = 24.5$  (s, 3C, Me<sub>3</sub>CSiBr), 29.9 (s, 9C, Me<sub>3</sub>CSiBr) ppm.

**<sup>19</sup>F-NMR (282.45 MHz, 298 K, CD<sub>2</sub>Cl<sub>2</sub>):**  $\delta = -184.9$  (s, 1F, [*al-f-al*]<sup>-</sup>), -75.8 (s, 54F, [(R<sup>F</sup>O)<sub>3</sub>Al-F-Al(OR<sup>F</sup>)<sub>3</sub>]<sup>-</sup>) ppm.

**<sup>29</sup>Si-NMR (59.64 MHz, 298 K, CD<sub>2</sub>Cl<sub>2</sub>):**  $\delta = 43.3$  (s, *t*Bu<sub>3</sub>SiBr) ppm.

c) Me<sub>3</sub>SiI

Ag[*al-f-al*] (235 mg, 0.148 mmol) was dissolved in 1,2,3-C<sub>6</sub>H<sub>3</sub>F<sub>3</sub> (2 ml) and toluene (0.2 ml). After addition of Me<sub>3</sub>SiI (0.02 ml, 29 mg, 0.145 mmol) a colorless precipitate (AgI) formed. The orange solution was stirred for another 30 min and then analyzed by NMR spectroscopy.

**<sup>1</sup>H-NMR (400.17 MHz, 298 K, C<sub>6</sub>H<sub>3</sub>F<sub>3</sub>/toluene):**  $\delta = 0.14$  (dec, <sup>6</sup>J<sub>H-F</sub> = 0.4 Hz, Me<sub>3</sub>SiOC(CF<sub>3</sub>)<sub>3</sub>), 0.55 (d, <sup>3</sup>J<sub>H-F</sub> = 12.8 Hz, Me<sub>3</sub>Si-F-Al(OR<sup>F</sup>)<sub>3</sub>), 0.59 (s, br, unknown side product), 0.67 (s, unknown side product) ppm.

**<sup>19</sup>F-NMR (376.54 MHz, 298 K, C<sub>6</sub>H<sub>3</sub>F<sub>3</sub>/toluene):**  $\delta = -184.8$  (s, [*al-f-al*]<sup>-</sup>), -156.6 (s, br, Me<sub>3</sub>Si-F-Al(OR<sup>F</sup>)<sub>3</sub>), -76.4 (s, Me<sub>3</sub>Si-F-Al(OR<sup>F</sup>)<sub>3</sub>), -76.0 (s, [*al-f-al*]<sup>-</sup>), -74.8 (s, Me<sub>3</sub>SiOC(CF<sub>3</sub>)<sub>3</sub>) ppm.

**<sup>27</sup>Al-NMR (104.27 MHz, 298 K, C<sub>6</sub>H<sub>3</sub>F<sub>3</sub>/toluene):**  $\delta = 40$  (s, br, Me<sub>3</sub>Si-F-Al(OR<sup>F</sup>)<sub>3</sub> / [*al-f-al*]<sup>-</sup>) ppm.

**<sup>29</sup>Si-NMR (79.50 MHz, 298 K, C<sub>6</sub>H<sub>3</sub>F<sub>3</sub>/toluene):**  $\delta = 28.1$  (s, Me<sub>3</sub>SiOC(CF<sub>3</sub>)<sub>3</sub>), 61.3 (s, unknown side product), 84.6 (d, <sup>1</sup>J<sub>Si-F</sub> = 260 Hz, Me<sub>3</sub>Si-F-Al(OR<sup>F</sup>)<sub>3</sub>) ppm.

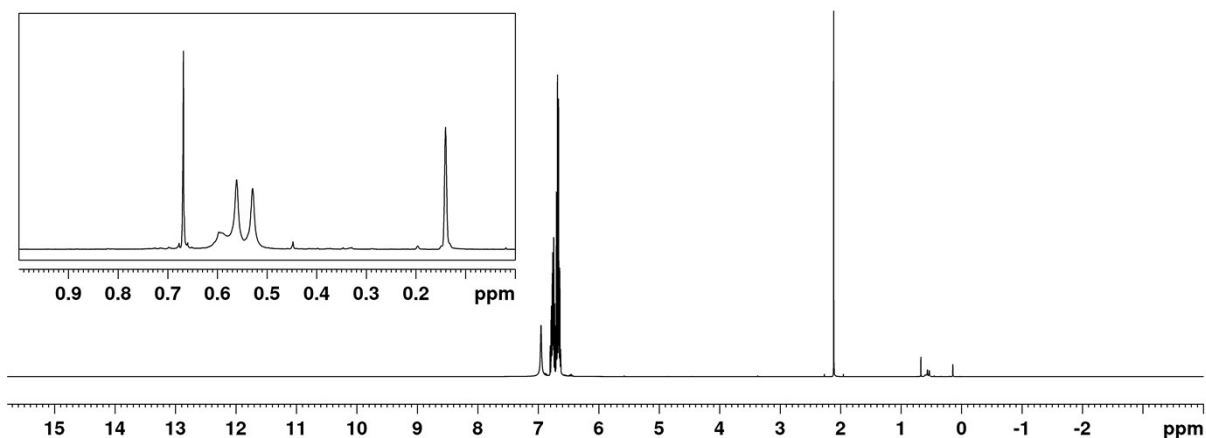

Figure S- 35:  $^1\text{H}$ -NMR spectrum (400.17 MHz, 298 K,  $\text{C}_6\text{H}_3\text{F}_3/\text{toluene}$ ) of the reaction of  $\text{Ag}[\text{al-f-al}]$  with  $\text{Me}_3\text{SiI}$ .

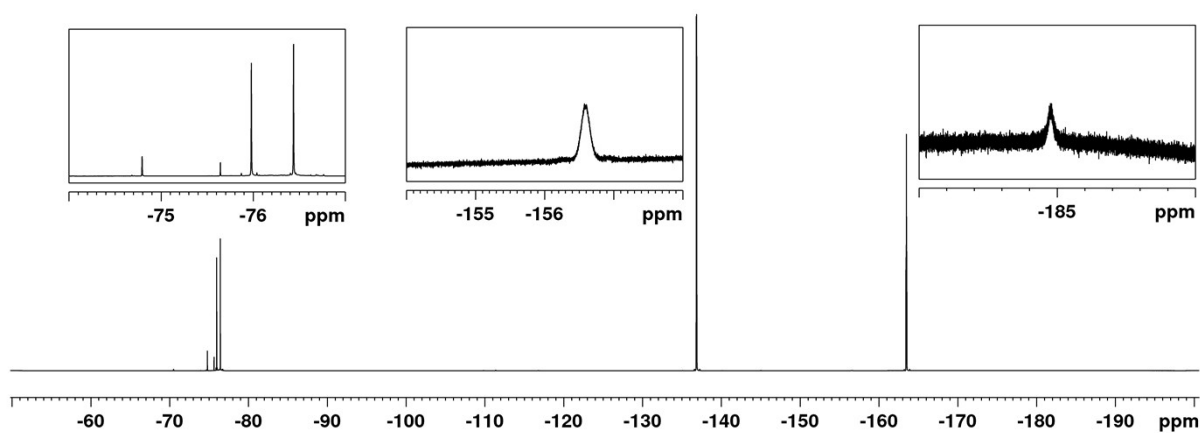

Figure S- 36:  $^{19}\text{F}$ -NMR spectrum (376.54 MHz, 298 K,  $\text{C}_6\text{H}_3\text{F}_3/\text{toluene}$ ) of the reaction of  $\text{Ag}[\text{al-f-al}]$  with  $\text{Me}_3\text{SiI}$ . The ratio between  $\text{Me}_3\text{Si-F-Al}(\text{OR}^f)_3$  and  $[\text{al-f-al}]^-$  is 2.4 : 1.

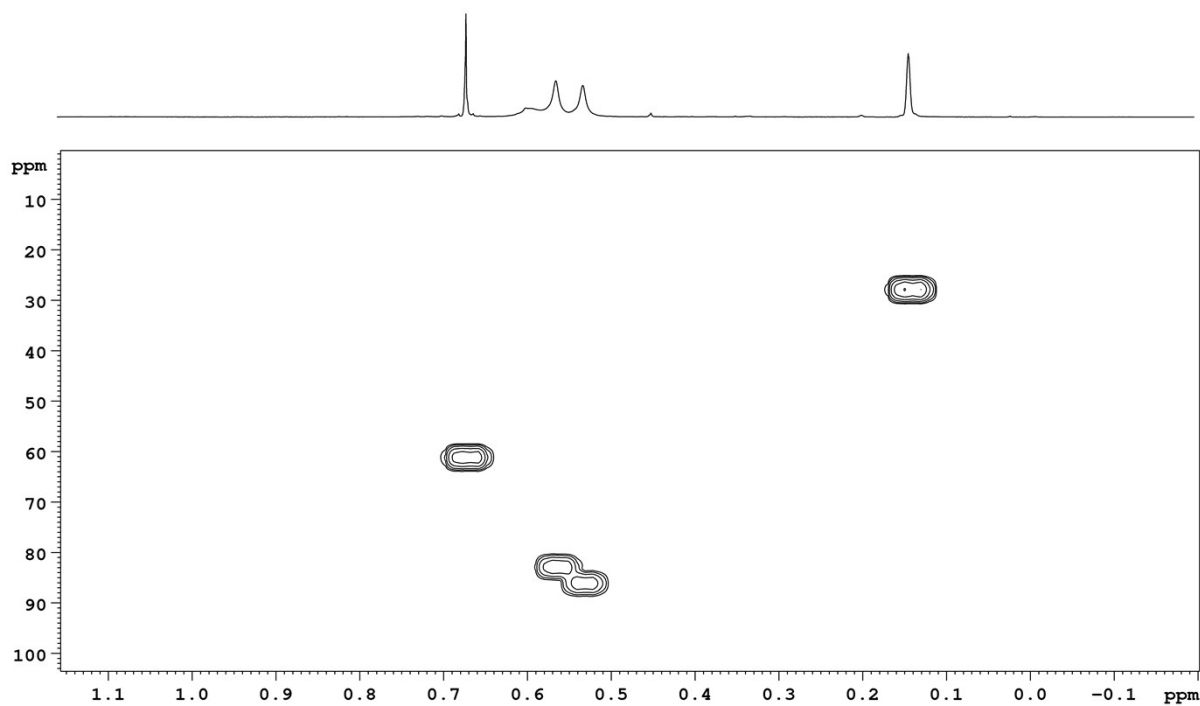

Figure S- 37:  $^1\text{H},^{29}\text{Si}$  HMBC NMR spectrum (400.17 MHz, 79.50 MHz 298 K,  $\text{C}_6\text{H}_3\text{F}_3/\text{toluene}$ ) of the reaction of  $\text{Ag}[\text{al-f-al}]$  with  $\text{Me}_3\text{SiI}$ .

## Reaction of Ag[*f-al*] with PCl<sub>3</sub>

Ag[*f-al*] (195 mg, 0.23 mmol) was weighed into a Schlenk vessel and dissolved in *o*-DFB (1 ml). Then PCl<sub>3</sub> (0.02 ml, 0.23 mmol, 1.0 eq.) was added and the solution became turbid after few seconds. The reaction mixture was stirred overnight. The reaction solution was analyzed by NMR spectroscopy.

**<sup>19</sup>F-NMR (376.54 MHz, 298 K, *o*-DFB/CD<sub>2</sub>Cl<sub>2</sub>):**  $\delta$  = -33.4 (d,  $^1J_{P-F}$  = 1400 Hz, PF<sub>3</sub>), -37.8 (d,  $^1J_{P-F}$  = 1375 Hz, PF<sub>2</sub>Cl), -58.0 (d,  $^1J_{P-F}$  = 1320 Hz, PFCl<sub>2</sub>), -75.6 (s, 54 F, [F{Al(OR<sup>F</sup>)<sub>3</sub>}<sub>2</sub>]<sup>-</sup>), -184.6 (s, 1 F, [F{Al(OR<sup>F</sup>)<sub>3</sub>}<sub>2</sub>]<sup>-</sup>) ppm.

**<sup>27</sup>Al-NMR (104.27 MHz, 298 K, *o*-DFB/CD<sub>2</sub>Cl<sub>2</sub>):**  $\delta$  = 37 (s, br, [F{Al(OR<sup>F</sup>)<sub>3</sub>}<sub>2</sub>]<sup>-</sup>) ppm.

**<sup>31</sup>P-NMR (161.99 MHz, 298 K, *o*-DFB/CD<sub>2</sub>Cl<sub>2</sub>):**  $\delta$  = 219.2 (s, PCl<sub>3</sub>), 218.1 (d,  $^1J_{P-F}$  = 1320 Hz, PFCl<sub>2</sub>), 104.6 (q,  $^1J_{P-F}$  = 1400 Hz, PF<sub>3</sub>) ppm.

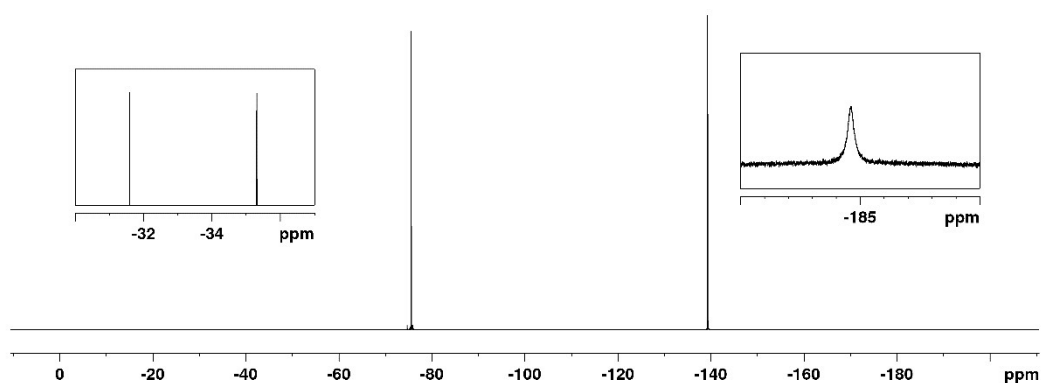

Figure S- 38: <sup>19</sup>F-NMR spectrum (376.54 MHz, 298 K, *o*-DFB/CD<sub>2</sub>Cl<sub>2</sub>) of the reaction of Ag[*f-al*] with PCl<sub>3</sub>.

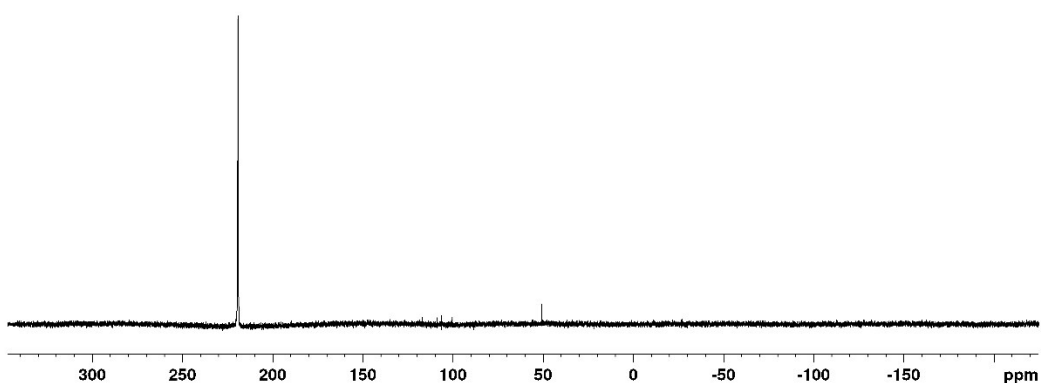

Figure S- 39: <sup>31</sup>P-NMR spectrum (166.99 MHz, 298 K, *o*-DFB/CD<sub>2</sub>Cl<sub>2</sub>) of the reaction of Ag[*f-al*] with PCl<sub>3</sub>.

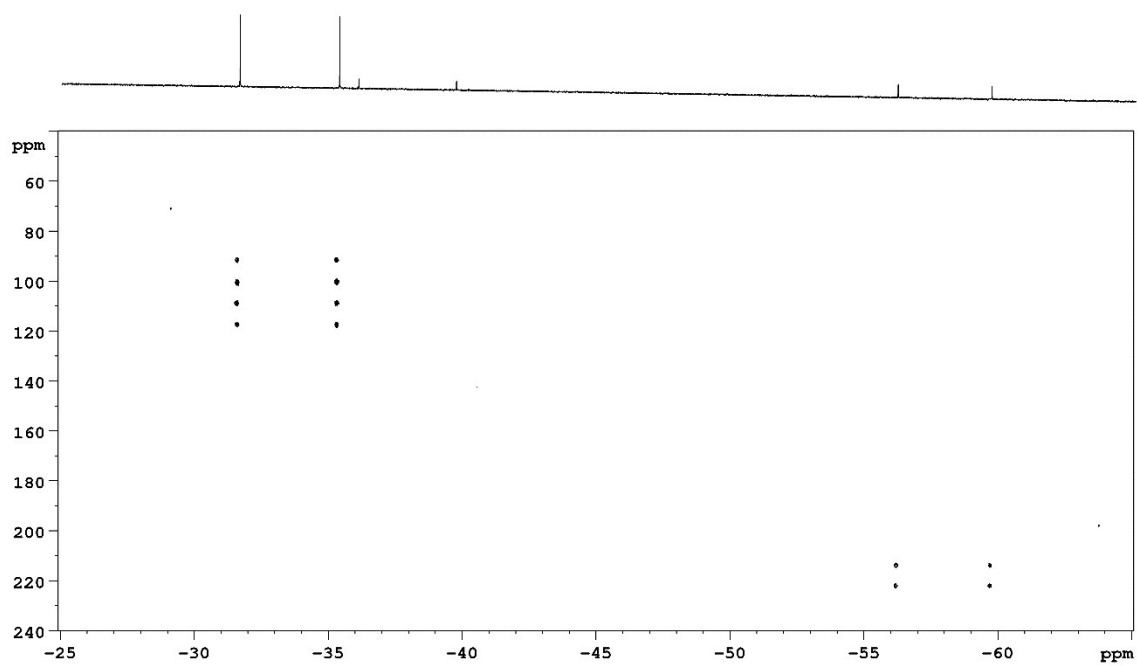

Figure S- 40:  $^{19}\text{F}, ^{31}\text{P}$  COSY-NMR spectrum (376.54 MHz, 298 K, *o*-DFB/ $\text{CD}_2\text{Cl}_2$ ) of the reaction of  $\text{Ag}[f\text{-}a]$  with  $\text{PCl}_3$ .

## Crystal Structure Data

### Crystal Structures of $[\text{SeCl}_3][\text{WCA}]$

Since the original data of these crystal structures will be published separate (see Ref. 33), only the asymmetric units of the different  $[\text{SeCl}_3][\text{WCA}]$  salts will be shown here (Figure S-41). It should be noted, that in case of  $[\text{SeCl}_3][\text{al-f-al}]^-$  the anion is located at an inversion center, which is commonly observed in structures containing  $[\text{al-f-al}]^-$  as anion. Therefore the asymmetric unit formally shows two  $[\text{f-al}]^-$  anions. In reality each of these  $[\text{f-al}]^-$  anions is one half of  $[\text{al-f-al}]^-$  with the (Al-)F atom being only 50% occupied.

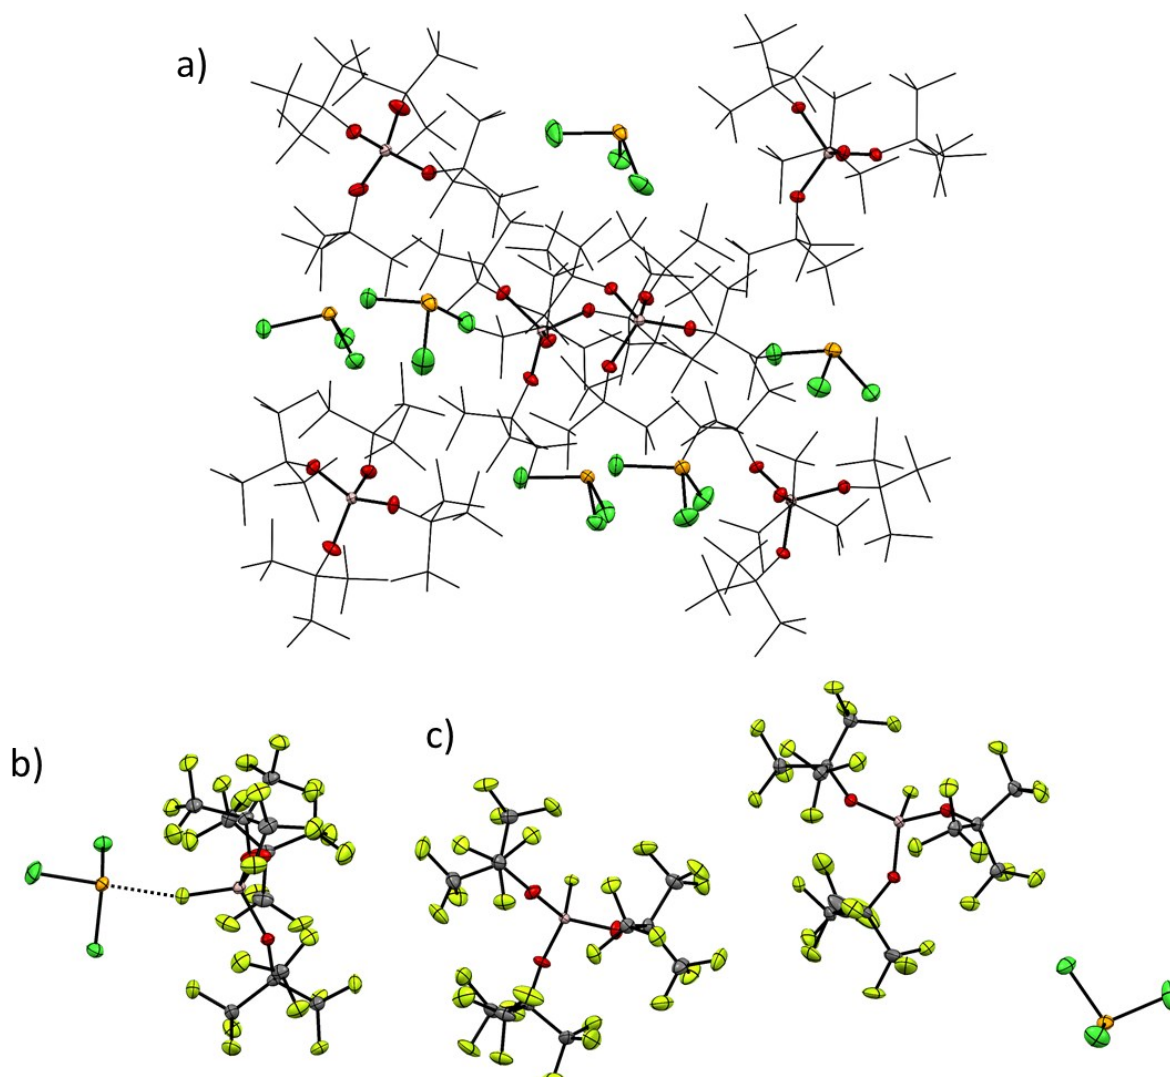

Figure S- 41: Asymmetric unit of  $[\text{SeCl}_3]^+[\text{WCA}]^-$  at 100 K with thermal ellipsoids at 50% probability level. Disorder was omitted for clarity. a)  $[\text{SeCl}_3]^+[\text{Al}(\text{OR}^{\text{F}})_4]^-$ . The  $\text{C}(\text{CF}_3)_3$  moieties are shown in wireframe; b)  $[\text{SeCl}_3]^+[\text{f-al}]^-$ ; c)  $[\text{SeCl}_3]^+[\text{al-f-al}]^-$ . The anion is located at an inversion center and therefore the asymmetric unit contains two half anions. Scheme: Se (orange), Cl (green), Al (pink), O (red), F (light green), C (grey).

## Crystal Structure of [Li(NCCCl<sub>3</sub>)]*[f-a]*

[Li(NCCCl<sub>3</sub>)]*[f-a]* was synthesized as described above and crystals suited for SC-XRD could be obtained from the reaction solution at -40°C. Equivalent C-C and C-F bond distances and thermal ellipsoids were equalized by using SADI, SIMU and RIGU commands.

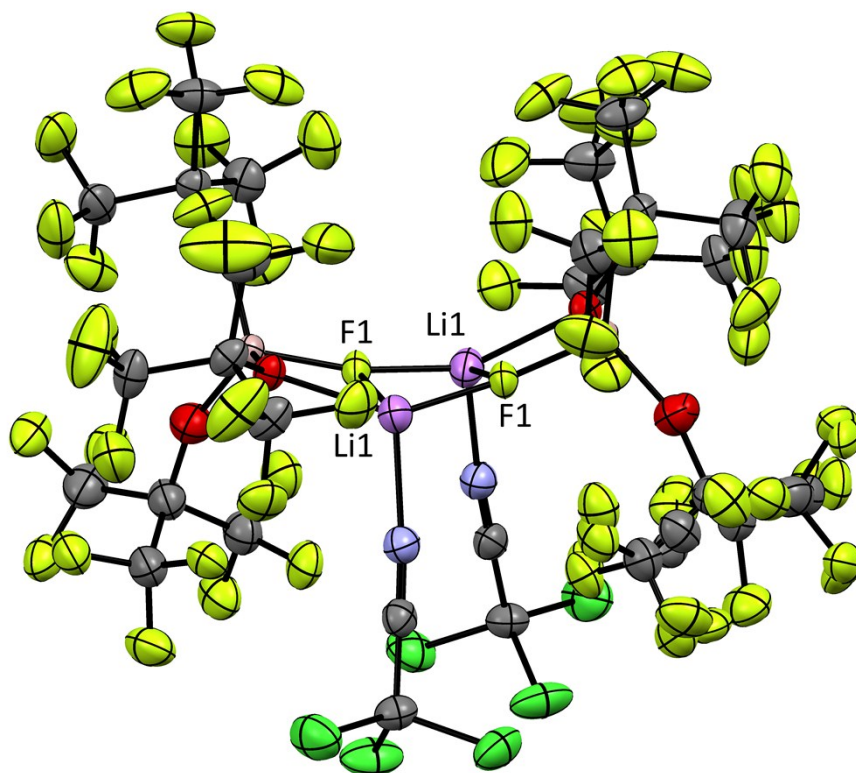

Figure S- 42: Molecular structure of [Li(NCCCl<sub>3</sub>)]*[f-a]* with thermal ellipsoids at 50% probability level. Some of the OR<sup>f</sup> groups were disordered over two positions. Only the most occupied moiety is shown. Scheme: Li (violet), Al (pink), O (red), F (light green), Cl (green), C (grey), N (blue) H (white).

**Table S-1.** Crystal data and structure refinement for [Li(NCCCl<sub>3</sub>)]*[f-a]*.

|                        |                                                                                                               |                  |
|------------------------|---------------------------------------------------------------------------------------------------------------|------------------|
| CCDC number            | CCDC 1845808                                                                                                  |                  |
| Empirical formula      | C <sub>28</sub> Al <sub>2</sub> Cl <sub>6</sub> F <sub>56</sub> Li <sub>2</sub> N <sub>2</sub> O <sub>6</sub> |                  |
| Formula weight         | 1804.84                                                                                                       |                  |
| Temperature            | 373(2) K                                                                                                      |                  |
| Wavelength             | 71.073 pm                                                                                                     |                  |
| Crystal system         | Monoclinic                                                                                                    |                  |
| Space group            | C2/c                                                                                                          |                  |
| Unit cell dimensions   | a = 3041.36(13) pm                                                                                            | a = 90°.         |
|                        | b = 1173.18(5) pm                                                                                             | b = 129.575(9)°. |
|                        | c = 2062.58(15) pm                                                                                            | g = 90°.         |
| Volume                 | 5.6726(8) nm <sup>3</sup>                                                                                     |                  |
| Z                      | 4                                                                                                             |                  |
| Density (calculated)   | 2.113 Mg/m <sup>3</sup>                                                                                       |                  |
| Absorption coefficient | 0.562 mm <sup>-1</sup>                                                                                        |                  |

|                                   |                                             |
|-----------------------------------|---------------------------------------------|
| F(000)                            | 3472                                        |
| Crystal size                      | 0.200 x 0.200 x 0.200 mm <sup>3</sup>       |
| Theta range for data collection   | 3.132 to 27.480°.                           |
| Index ranges                      | -39<=h<=39, -15<=k<=15, -26<=l<=26          |
| Reflections collected             | 79101                                       |
| Independent reflections           | 6479 [R(int) = 0.0677]                      |
| Completeness to theta = 25.242°   | 99.8 %                                      |
| Absorption correction             | Semi-empirical from equivalents             |
| Max. and min. transmission        | 1.000 and 0.795                             |
| Refinement method                 | Full-matrix least-squares on F <sup>2</sup> |
| Data / restraints / parameters    | 6479 / 2844 / 587                           |
| Goodness-of-fit on F <sup>2</sup> | 1.092                                       |
| Final R indices [I>2sigma(I)]     | R1 = 0.0651, wR2 = 0.1807                   |
| R indices (all data)              | R1 = 0.0841, wR2 = 0.1964                   |
| Extinction coefficient            | n/a                                         |
| Largest diff. peak and hole       | 1.555 and -0.554 e.Å <sup>-3</sup>          |

### Crystal Structure of DMC–Al(OR<sup>F</sup>)<sub>3</sub>

DMC–Al(OR<sup>F</sup>)<sub>3</sub> was synthesized as described above. Crystals suited for SC-XRD could be obtained from the reaction solution by addition of CH<sub>2</sub>Cl<sub>2</sub>, followed by storage at –30°C. Equivalent C–C, C–O and C–F bond distances and thermal ellipsoids in the disordered OC(CF<sub>3</sub>)<sub>3</sub> and DMC groups were equalized by using SADI, SIMU and RIGU commands.



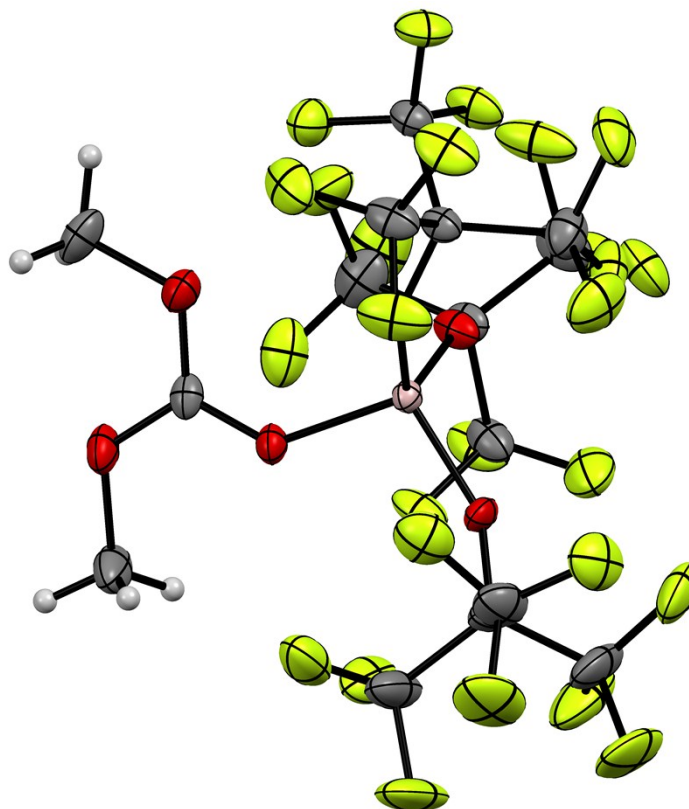

Figure S-43: Molecular structure of  $\text{DMC-Al(OR}^{\text{F}}\text{)}_3$  with thermal ellipsoids at 50% probability level. H atoms are shown as spheres of arbitrary radius. Some of the  $\text{OR}^{\text{F}}$  groups and the DMC group were disordered over two positions. Only the most occupied moiety is shown. Scheme: Al (pink), O (red), F (light green), C (grey), H (white).

**Table S-2.** Crystal data and structure refinement for  $\text{DMC-Al(OR}^{\text{F}}\text{)}_3$ .

|                                 |                                                                    |                         |
|---------------------------------|--------------------------------------------------------------------|-------------------------|
| CCDC number                     | CCDC 1845809                                                       |                         |
| Empirical formula               | $\text{C}_{15}\text{H}_6\text{AlF}_{27}\text{O}_6$                 |                         |
| Formula weight                  | 822.18                                                             |                         |
| Temperature                     | 100(2) K                                                           |                         |
| Wavelength                      | 71.073 pm                                                          |                         |
| Crystal system                  | Monoclinic                                                         |                         |
| Space group                     | $\text{P2}_1/\text{c}$                                             |                         |
| Unit cell dimensions            | $a = 1080.66(3)$ pm                                                | $a = 90^\circ$ .        |
|                                 | $b = 1395.80(4)$ pm                                                | $b = 90.190(2)^\circ$ . |
|                                 | $c = 1729.77(5)$ pm                                                | $g = 90^\circ$ .        |
| Volume                          | $2.60915(13)$ nm <sup>3</sup>                                      |                         |
| Z                               | 4                                                                  |                         |
| Density (calculated)            | $2.093$ Mg/m <sup>3</sup>                                          |                         |
| Absorption coefficient          | $0.305$ mm <sup>-1</sup>                                           |                         |
| F(000)                          | 1600                                                               |                         |
| Crystal size                    | $0.15 \times 0.15 \times 0.01$ mm <sup>3</sup>                     |                         |
| Theta range for data collection | 1.875 to 30.588°.                                                  |                         |
| Index ranges                    | $-14 \leq h \leq 15$ , $-19 \leq k \leq 19$ , $-24 \leq l \leq 24$ |                         |

|                                   |                                             |
|-----------------------------------|---------------------------------------------|
| Reflections collected             | 82953                                       |
| Independent reflections           | 7987 [R(int) = 0.0404]                      |
| Completeness to theta = 25.242°   | 100.0 %                                     |
| Absorption correction             | Semi-empirical from equivalents             |
| Max. and min. transmission        | 0.7461 and 0.7064                           |
| Refinement method                 | Full-matrix least-squares on F <sup>2</sup> |
| Data / restraints / parameters    | 7987 / 5038 / 719                           |
| Goodness-of-fit on F <sup>2</sup> | 0.931                                       |
| Final R indices [I>2sigma(I)]     | R1 = 0.0429, wR2 = 0.0991                   |
| R indices (all data)              | R1 = 0.0721, wR2 = 0.1161                   |
| Extinction coefficient            | n/a                                         |
| Largest diff. peak and hole       | 0.390 and -0.291 e.Å <sup>-3</sup>          |

### Crystal Structure of [Li(DMC)<sub>3</sub>][f-a]

[Li(DMC)<sub>3</sub>][f-a] was synthesized as described above and crystals suited for SC-XRD could be obtained from the reaction solution by addition of CH<sub>2</sub>Cl<sub>2</sub>, followed by storage at -30°C. Equivalent C-C, C-O and C-F bond distances and thermal ellipsoids in the disordered OC(CF<sub>3</sub>)<sub>3</sub> and DMC groups were equalized by using SADI, SIMU and RIGU commands.

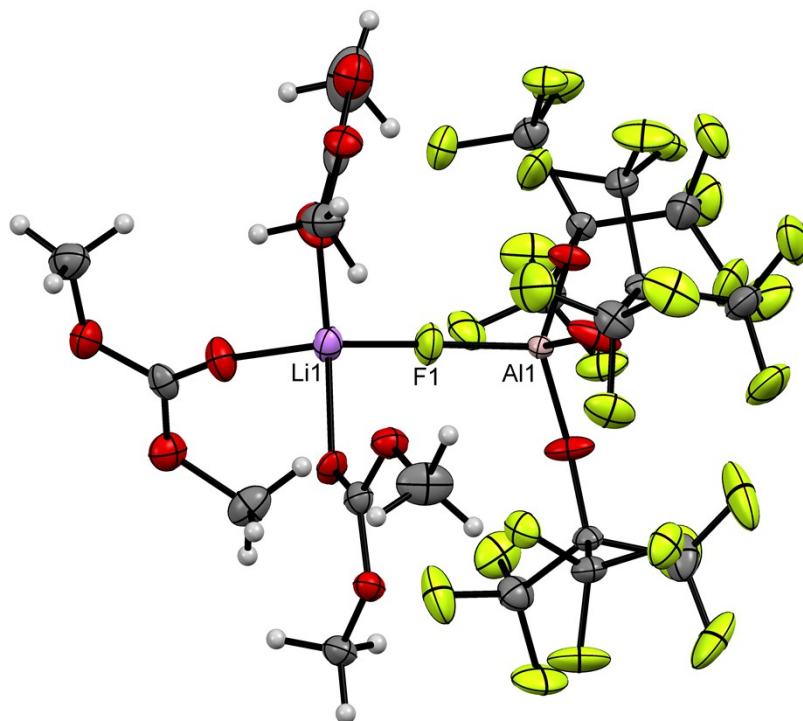

Figure S- 44: Molecular structure of [Li(DMC)<sub>3</sub>][f-a] with thermal ellipsoids at 50% probability level. For clarity, only one of two independent molecules of the asymmetric unit is shown and H atoms are shown as spheres of arbitrary radius. Some of the OR<sup>f</sup> groups and the DMC groups were disordered over two positions. Only the most occupied moiety is shown. Scheme: Li (violet), Al (pink), O (red), F (light green), Cl (green), C (grey), H (white).

**Table S-3.** Crystal data and structure refinement for [Li(DMC)<sub>3</sub>][*f-a*].

|                                   |                                                                                                                |
|-----------------------------------|----------------------------------------------------------------------------------------------------------------|
| CCDC number                       | CCDC 1845810                                                                                                   |
| Empirical formula                 | C <sub>21</sub> H <sub>18</sub> Al F <sub>28</sub> Li O <sub>12</sub>                                          |
| Formula weight                    | 1028.27                                                                                                        |
| Temperature                       | 100(2) K                                                                                                       |
| Wavelength                        | 71.073 pm                                                                                                      |
| Crystal system                    | Monoclinic                                                                                                     |
| Space group                       | P2 <sub>1</sub> /c                                                                                             |
| Unit cell dimensions              | a = 3592.21(16) pm      a = 90°.<br>b = 1074.68(5) pm      b = 102.381(2)°.<br>c = 1939.85(9) pm      g = 90°. |
| Volume                            | 7.3146(6) nm <sup>3</sup>                                                                                      |
| Z                                 | 8                                                                                                              |
| Density (calculated)              | 1.867 Mg/m <sup>3</sup>                                                                                        |
| Absorption coefficient            | 0.253 mm <sup>-1</sup>                                                                                         |
| F(000)                            | 4064                                                                                                           |
| Crystal size                      | 0.140 x 0.080 x 0.040 mm <sup>3</sup>                                                                          |
| Theta range for data collection   | 1.161 to 25.408°.                                                                                              |
| Index ranges                      | -43<=h<=43, -12<=k<=12, -23<=l<=23                                                                             |
| Reflections collected             | 256191                                                                                                         |
| Independent reflections           | 13451 [R(int) = 0.0588]                                                                                        |
| Completeness to theta = 25.242°   | 100.0 %                                                                                                        |
| Absorption correction             | Semi-empirical from equivalents                                                                                |
| Max. and min. transmission        | 0.7454 and 0.6989                                                                                              |
| Refinement method                 | Full-matrix least-squares on F <sup>2</sup>                                                                    |
| Data / restraints / parameters    | 13451 / 11779 / 1458                                                                                           |
| Goodness-of-fit on F <sup>2</sup> | 1.037                                                                                                          |
| Final R indices [I>2sigma(I)]     | R1 = 0.0449, wR2 = 0.1036                                                                                      |
| R indices (all data)              | R1 = 0.0618, wR2 = 0.1132                                                                                      |
| Extinction coefficient            | n/a                                                                                                            |
| Largest diff. peak and hole       | 0.644 and -0.489 e.Å <sup>-3</sup>                                                                             |

### Crystal Structure of [Ag(*o*-DFB)<sub>3</sub>][*f-a*]

[Ag(*o*-DFB)<sub>3</sub>][*f-a*] was synthesized as described above and crystals suited for SC-XRD could be obtained from the reaction solution by layering with pentane at rt. Equivalent C–C and C–F bond distances and thermal ellipsoids in the disordered *o*-DFB groups were equalized by using SADI, SIMU and RIGU commands.

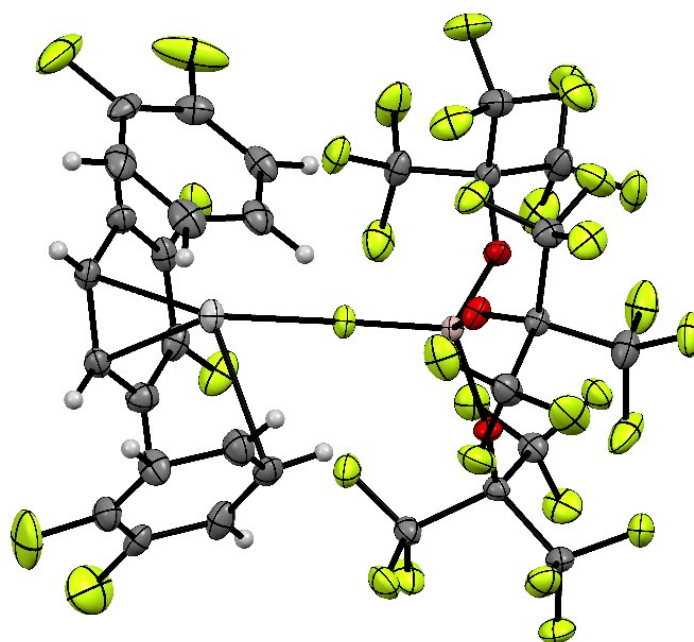

Figure S- 45: Molecular structure of  $[Ag(o\text{-DFB})_3][f\text{-al}]$  with thermal ellipsoids at 50% probability level. H atoms are shown as spheres of arbitrary radius. Some of the *o*-DFB groups were disordered over two or three positions. Only the most occupied moiety is shown. Scheme: Ag (light grey), Al (pink), O (red), F (light green), C (grey), H (white).

**Table S-4.** Crystal data and structure refinement for  $[Ag(o\text{-DFB})_3][f\text{-al}]$ .

|                                 |                                                                      |                   |
|---------------------------------|----------------------------------------------------------------------|-------------------|
| CCDC number                     | CCDC 1845811                                                         |                   |
| Empirical formula               | C <sub>30</sub> H <sub>12</sub> Ag Al F <sub>34</sub> O <sub>3</sub> |                   |
| Formula weight                  | 1201.25                                                              |                   |
| Temperature                     | 100(2) K                                                             |                   |
| Wavelength                      | 71.073 pm                                                            |                   |
| Crystal system                  | Monoclinic                                                           |                   |
| Space group                     | P2 <sub>1</sub> /n                                                   |                   |
| Unit cell dimensions            | a = 1026.59(2) pm                                                    | a = 90°.          |
|                                 | b = 1746.05(4) pm                                                    | b = 99.0980(10)°. |
|                                 | c = 2099.05(5) pm                                                    | g = 90°.          |
| Volume                          | 3.71516(14) nm <sup>3</sup>                                          |                   |
| Z                               | 4                                                                    |                   |
| Density (calculated)            | 2.148 Mg/m <sup>3</sup>                                              |                   |
| Absorption coefficient          | 0.774 mm <sup>-1</sup>                                               |                   |
| F(000)                          | 2328                                                                 |                   |
| Crystal size                    | 0.6 x 0.2 x 0.05 mm <sup>3</sup>                                     |                   |
| Theta range for data collection | 1.525 to 33.453°.                                                    |                   |
| Index ranges                    | -15 ≤ h ≤ 15, -23 ≤ k ≤ 26, -27 ≤ l ≤ 30                             |                   |
| Reflections collected           | 138683                                                               |                   |
| Independent reflections         | 12900 [R(int) = 0.0231]                                              |                   |
| Completeness to theta = 25.242° | 100.0 %                                                              |                   |

|                                   |                                             |
|-----------------------------------|---------------------------------------------|
| Absorption correction             | Semi-empirical from equivalents             |
| Max. and min. transmission        | 0.7466 and 0.6267                           |
| Refinement method                 | Full-matrix least-squares on F <sup>2</sup> |
| Data / restraints / parameters    | 12900 / 2245 / 813                          |
| Goodness-of-fit on F <sup>2</sup> | 1.022                                       |
| Final R indices [I>2sigma(I)]     | R1 = 0.0276, wR2 = 0.0674                   |
| R indices (all data)              | R1 = 0.0324, wR2 = 0.0704                   |
| Extinction coefficient            | n/a                                         |
| Largest diff. peak and hole       | 0.858 and -0.639 e.Å <sup>-3</sup>          |

### Crystal Structure of [Ag(*o*-DFB)<sub>3</sub>][*al*-*f*-*al*]

[Ag(*o*-DFB)<sub>3</sub>][*al*-*f*-*al*] was synthesized as described above and crystals suited for SC-XRD could be obtained from the reaction solution by storage at -30°C. Equivalent C-C and C-F bond distances and thermal ellipsoids in the disordered *o*-DFB groups were equalized by using SADI, SIMU and RIGU commands.

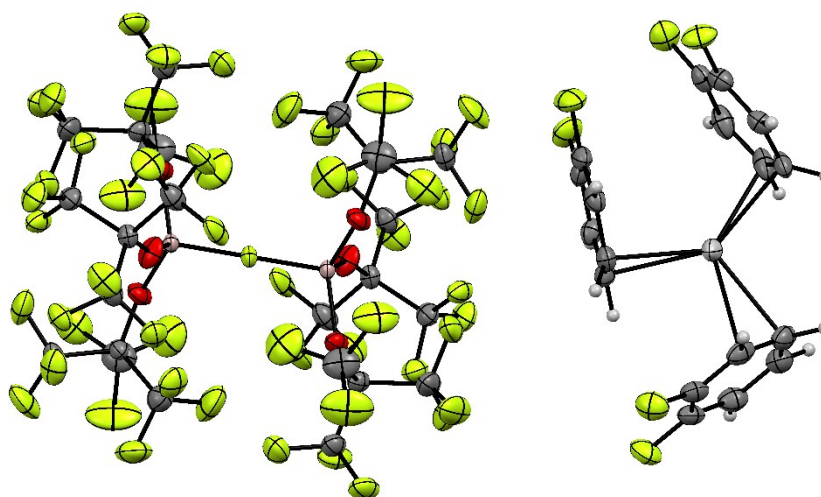

Figure S- 46: Molecular structure of [Ag(*o*-DFB)<sub>3</sub>][*al*-*f*-*al*] with thermal ellipsoids at 50% probability level. For clarity, only one of two independent molecules of the asymmetric unit is shown and H atoms are shown as spheres of arbitrary radius. Some of the OR<sup>F</sup> groups were disordered over two positions. Only the most occupied moiety is shown. Scheme: Ag (light grey), Al (pink), O (red), F (light green), C (grey), H (white).

**Table S-5.** Crystal data and structure refinement for [Ag(*o*-DFB)<sub>3</sub>][*al*-*f*-*al*].

|                   |                       |
|-------------------|-----------------------|
| CCDC number       | CCDC 1845817          |
| Empirical formula | C42 H12 Ag Al2 F61 O6 |
| Formula weight    | 1933.35               |
| Temperature       | 100(2) K              |
| Wavelength        | 71.073 pm             |
| Crystal system    | Triclinic             |
| Space group       | P-1                   |

|                                   |                                                             |                                                             |
|-----------------------------------|-------------------------------------------------------------|-------------------------------------------------------------|
| Unit cell dimensions              | a = 1548.56(4) pm<br>b = 1768.66(5) pm<br>c = 2256.79(6) pm | a = 76.0930(10)°.<br>b = 84.0230(10)°.<br>g = 81.6170(10)°. |
| Volume                            | 5.9204(3) nm <sup>3</sup>                                   |                                                             |
| Z                                 | 4                                                           |                                                             |
| Density (calculated)              | 2.169 Mg/m <sup>3</sup>                                     |                                                             |
| Absorption coefficient            | 0.611 mm <sup>-1</sup>                                      |                                                             |
| F(000)                            | 3736                                                        |                                                             |
| Crystal size                      | 0.220 x 0.210 x 0.200 mm <sup>3</sup>                       |                                                             |
| Theta range for data collection   | 0.932 to 26.855°.                                           |                                                             |
| Index ranges                      | -19<=h<=17, -21<=k<=22, -28<=l<=28                          |                                                             |
| Reflections collected             | 130364                                                      |                                                             |
| Independent reflections           | 25254 [R(int) = 0.0276]                                     |                                                             |
| Completeness to theta = 25.242°   | 99.8 %                                                      |                                                             |
| Refinement method                 | Full-matrix least-squares on F <sup>2</sup>                 |                                                             |
| Data / restraints / parameters    | 25254 / 40740 / 2528                                        |                                                             |
| Goodness-of-fit on F <sup>2</sup> | 1.047                                                       |                                                             |
| Final R indices [I>2sigma(I)]     | R1 = 0.0555, wR2 = 0.1448                                   |                                                             |
| R indices (all data)              | R1 = 0.0771, wR2 = 0.1604                                   |                                                             |
| Extinction coefficient            | n/a                                                         |                                                             |
| Largest diff. peak and hole       | 2.616 and -0.478 e.Å <sup>-3</sup>                          |                                                             |

### Crystal Structure of [Ag(*o*-DFB)<sub>2</sub>][*al-f-al*]

[Ag(*o*-DFB)<sub>2</sub>][*al-f-al*] was synthesized as described above and crystals suited for SC-XRD could be obtained from the reaction solution by layering with pentane. Equivalent C–C and C–F bond distances and thermal ellipsoids in the disordered *o*-DFB groups were equalized by using SADI, SIMU and RIGU commands. The Ag atoms in the cation were disordered over eight positions.

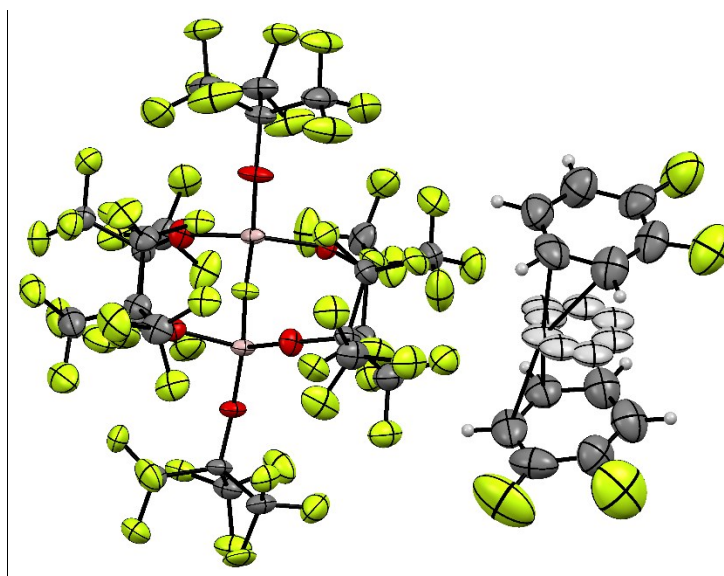

Figure S- 47: Molecular structure of  $[Ag(o\text{-DFB})_2][al\text{-}f\text{-}al]$  with thermal ellipsoids at 50% probability level. For clarity, H atoms are shown as spheres of arbitrary radius. Some of the OR<sup>F</sup> groups were disordered over two positions. Only the most occupied moiety is shown. Scheme: Ag (light grey), Al (pink), O (red), F (light green), C (grey), H (white).

**Table S-6.** Crystal data and structure refinement for  $[Ag(o\text{-DFB})_2][al\text{-}f\text{-}al]$ .

|                                 |                                                                                  |                 |
|---------------------------------|----------------------------------------------------------------------------------|-----------------|
| CCDC number                     | CCDC 1845812                                                                     |                 |
| Empirical formula               | C <sub>36</sub> H <sub>8</sub> Ag Al <sub>2</sub> F <sub>59</sub> O <sub>6</sub> |                 |
| Formula weight                  | 1819.46                                                                          |                 |
| Temperature                     | 100(2) K                                                                         |                 |
| Wavelength                      | 71.073 pm                                                                        |                 |
| Crystal system                  | Monoclinic                                                                       |                 |
| Space group                     | Cc                                                                               |                 |
| Unit cell dimensions            | a = 1310.28(12) pm                                                               | a = 90°.        |
|                                 | b = 2939.0(3) pm                                                                 | b = 99.674(4)°. |
|                                 | c = 1412.90(12) pm                                                               | g = 90°.        |
| Volume                          | 5.3636(8) nm <sup>3</sup>                                                        |                 |
| Z                               | 4                                                                                |                 |
| Density (calculated)            | 2.253 Mg/m <sup>3</sup>                                                          |                 |
| Absorption coefficient          | 0.662 mm <sup>-1</sup>                                                           |                 |
| F(000)                          | 3504                                                                             |                 |
| Crystal size                    | 0.23 x 0.15 x 0.10 mm <sup>3</sup>                                               |                 |
| Theta range for data collection | 1.722 to 29.599°.                                                                |                 |
| Index ranges                    | -18 ≤ h ≤ 17, -40 ≤ k ≤ 39, -19 ≤ l ≤ 19                                         |                 |
| Reflections collected           | 60147                                                                            |                 |
| Independent reflections         | 14011 [R(int) = 0.0275]                                                          |                 |
| Completeness to theta = 25.242° | 100.0 %                                                                          |                 |
| Absorption correction           | Semi-empirical from equivalents                                                  |                 |
| Max. and min. transmission      | 0.7459 and 0.7057                                                                |                 |

|                                      |                                       |
|--------------------------------------|---------------------------------------|
| Refinement method                    | Full-matrix least-squares on $F^2$    |
| Data / restraints / parameters       | 14011 / 19238 / 1510                  |
| Goodness-of-fit on $F^2$             | 0.994                                 |
| Final R indices [ $I > 2\sigma(I)$ ] | R1 = 0.0633, wR2 = 0.1652             |
| R indices (all data)                 | R1 = 0.0782, wR2 = 0.1793             |
| Absolute structure parameter         | 0.47(4)                               |
| Extinction coefficient               | n/a                                   |
| Largest diff. peak and hole          | 0.942 and -0.501 e. $\text{\AA}^{-3}$ |

### Crystal Structure of $[\text{Ag}(o\text{-DFB})_2][\text{Al}(\text{OR}^{\text{F}})_4]$

$[\text{Ag}(o\text{-DFB})_2][\text{Al}(\text{OR}^{\text{F}})_4]$  was synthesized as described in the literature in *o*-DFB and crystals suited for SC-XRD could be obtained from the reaction solution by layering with pentane. Equivalent C–C and C–F bond distances and thermal ellipsoids in the disordered *o*-DFB groups were equalized by using SADI, SIMU and RIGU commands. The Ag atoms in the cation are disordered over an inversion center.

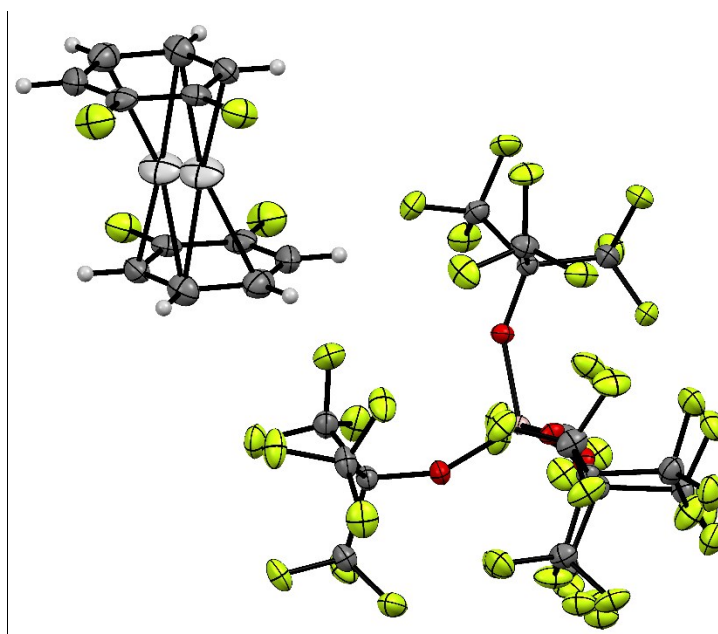

Figure S- 48: Molecular structure of  $[\text{Ag}(o\text{-DFB})_2][\text{Al}(\text{OR}^{\text{F}})_4]$  with thermal ellipsoids at 50% probability level. For clarity, H atoms are shown as spheres of arbitrary radius. Some of the  $\text{OR}^{\text{F}}$  groups were disordered over two positions. Only the most occupied moiety is shown. Scheme: Ag (light grey), Al (pink), O (red), F (light green), C (grey), H (white).

**Table S-7.** Crystal data and structure refinement for  $[\text{Ag}(o\text{-DFB})_2][\text{Al}(\text{OR}^{\text{F}})_4]$ .

|                   |                                                                         |
|-------------------|-------------------------------------------------------------------------|
| CCDC number       | CCDC 1845813                                                            |
| Empirical formula | $\text{C}_{28} \text{H}_8 \text{Ag} \text{Al} \text{F}_{40} \text{O}_4$ |
| Formula weight    | 1303.19                                                                 |
| Temperature       | 100(2) K                                                                |
| Wavelength        | 71.073 pm                                                               |



|                                   |                                             |                 |
|-----------------------------------|---------------------------------------------|-----------------|
| Crystal system                    | Monoclinic                                  |                 |
| Space group                       | P2 <sub>1</sub> /n                          |                 |
| Unit cell dimensions              | a = 1415.65(5) pm                           | a = 90°.        |
|                                   | b = 1845.64(6) pm                           | b = 91.200(2)°. |
|                                   | c = 1465.10(5) pm                           | g = 90°.        |
| Volume                            | 3.8271(2) nm <sup>3</sup>                   |                 |
| Z                                 | 4                                           |                 |
| Density (calculated)              | 2.262 Mg/m <sup>3</sup>                     |                 |
| Absorption coefficient            | 0.785 mm <sup>-1</sup>                      |                 |
| F(000)                            | 2512                                        |                 |
| Crystal size                      | 0.200 x 0.200 x 0.050 mm <sup>3</sup>       |                 |
| Theta range for data collection   | 1.775 to 27.100°.                           |                 |
| Index ranges                      | -18<=h<=18, 0<=k<=23, 0<=l<=18              |                 |
| Reflections collected             | 9266                                        |                 |
| Independent reflections           | 9266 [R(int) = ?]                           |                 |
| Completeness to theta = 25.242°   | 100.0 %                                     |                 |
| Absorption correction             | Semi-empirical from equivalents             |                 |
| Max. and min. transmission        | 0.746333 and 0.683262                       |                 |
| Refinement method                 | Full-matrix least-squares on F <sup>2</sup> |                 |
| Data / restraints / parameters    | 9266 / 3079 / 697                           |                 |
| Goodness-of-fit on F <sup>2</sup> | 1.029                                       |                 |
| Final R indices [I>2sigma(I)]     | R1 = 0.0446, wR2 = 0.1066                   |                 |
| R indices (all data)              | R1 = 0.0685, wR2 = 0.1172                   |                 |
| Extinction coefficient            | n/a                                         |                 |
| Largest diff. peak and hole       | 0.687 and -0.425 e.Å <sup>-3</sup>          |                 |

### Crystal Structure of [NO][*al-f-al*]

[NO][*al-f-al*] was synthesized as described above and crystals suited for SC-XRD could be obtained from the reaction solution by storage at -30°C. Equivalent C-C and C-F bond distances and thermal ellipsoids in the disordered OR<sup>F</sup> groups were equalized by using SADI, SIMU and RIGU commands.

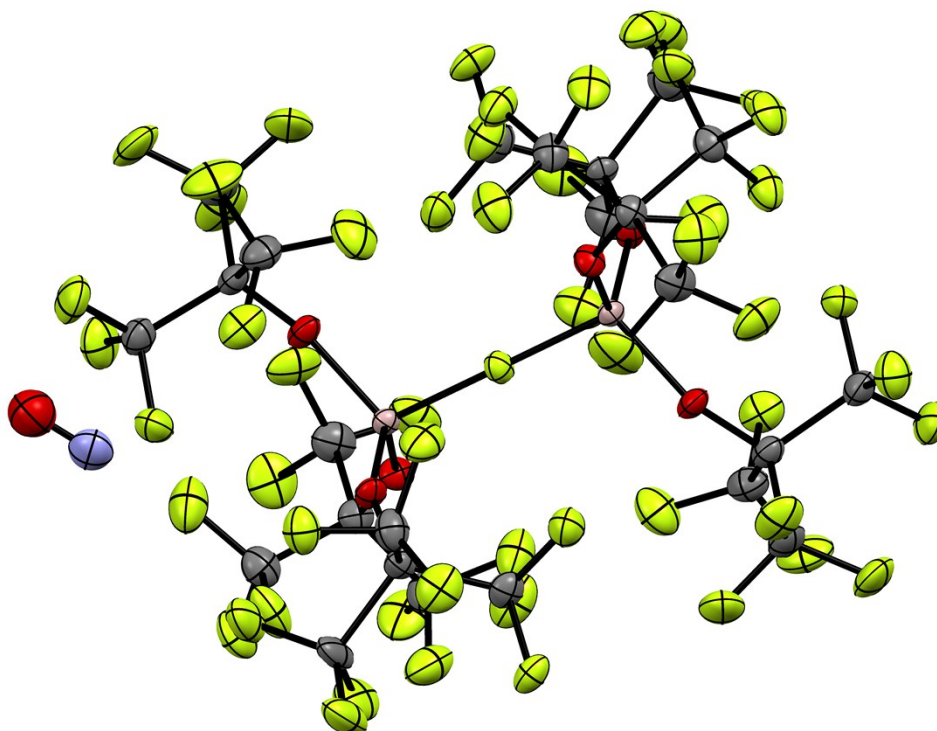

Figure S- 49: Molecular structure of [NO][*al-f-al*] with thermal ellipsoids at 50% probability level. Some of the OR<sup>F</sup> groups were disordered over two positions. Only the most occupied moiety is shown. Scheme: N (blue), Al (pink), O (red), F (light green), C (grey), H (white).

**Table S-8.** Crystal data and structure refinement for [NO][*al-f-al*].

|                                 |                                                                  |                   |
|---------------------------------|------------------------------------------------------------------|-------------------|
| CCDC number                     | CCDC 18458114                                                    |                   |
| Empirical formula               | C <sub>24</sub> Al <sub>2</sub> F <sub>55</sub> N O <sub>7</sub> |                   |
| Formula weight                  | 1513.21                                                          |                   |
| Temperature                     | 100(2) K                                                         |                   |
| Wavelength                      | 71.073 pm                                                        |                   |
| Crystal system                  | Monoclinic                                                       |                   |
| Space group                     | P2 <sub>1</sub> /n                                               |                   |
| Unit cell dimensions            | a = 1068.41(2) pm                                                | a = 90°.          |
|                                 | b = 1829.66(3) pm                                                | b = 94.8220(10)°. |
|                                 | c = 2237.98(3) pm                                                | g = 90°.          |
| Volume                          | 4.35938(12) nm <sup>3</sup>                                      |                   |
| Z                               | 4                                                                |                   |
| Density (calculated)            | 2.306 Mg/m <sup>3</sup>                                          |                   |
| Absorption coefficient          | 0.350 mm <sup>-1</sup>                                           |                   |
| F(000)                          | 2912                                                             |                   |
| Crystal size                    | 0.160 x 0.100 x 0.070 mm <sup>3</sup>                            |                   |
| Theta range for data collection | 1.440 to 27.102°.                                                |                   |
| Index ranges                    | -13 ≤ h ≤ 13, -23 ≤ k ≤ 23, -28 ≤ l ≤ 28                         |                   |
| Reflections collected           | 70133                                                            |                   |

|                                   |                                             |
|-----------------------------------|---------------------------------------------|
| Independent reflections           | 9618 [R(int) = 0.0415]                      |
| Completeness to theta = 25.242°   | 100.0 %                                     |
| Absorption correction             | Semi-empirical from equivalents             |
| Max. and min. transmission        | 0.7457 and 0.7115                           |
| Refinement method                 | Full-matrix least-squares on F <sup>2</sup> |
| Data / restraints / parameters    | 9618 / 12483 / 1073                         |
| Goodness-of-fit on F <sup>2</sup> | 1.039                                       |
| Final R indices [I > 2σ(I)]       | R1 = 0.0489, wR2 = 0.1079                   |
| R indices (all data)              | R1 = 0.0726, wR2 = 0.1202                   |
| Extinction coefficient            | n/a                                         |
| Largest diff. peak and hole       | 0.449 and -0.372 e.Å <sup>-3</sup>          |

### Crystal Structure of [Ag(PhF)<sub>2</sub>][F<sub>2</sub>B(OR<sup>F</sup>)<sub>2</sub>]

The reaction of Me<sub>3</sub>Si–F–Al(OR<sup>F</sup>)<sub>3</sub> with AgBF<sub>4</sub> yielded crystals of [Ag(PhF)<sub>2</sub>][F<sub>2</sub>B(OR<sup>F</sup>)<sub>2</sub>] suited for SC-XRD from the reaction solution by storage at –30°C. Equivalent C–C and C–F bond distances and thermal ellipsoids in the disordered OR<sup>F</sup> groups were equalized by using SADI, SIMU and RIGU commands.

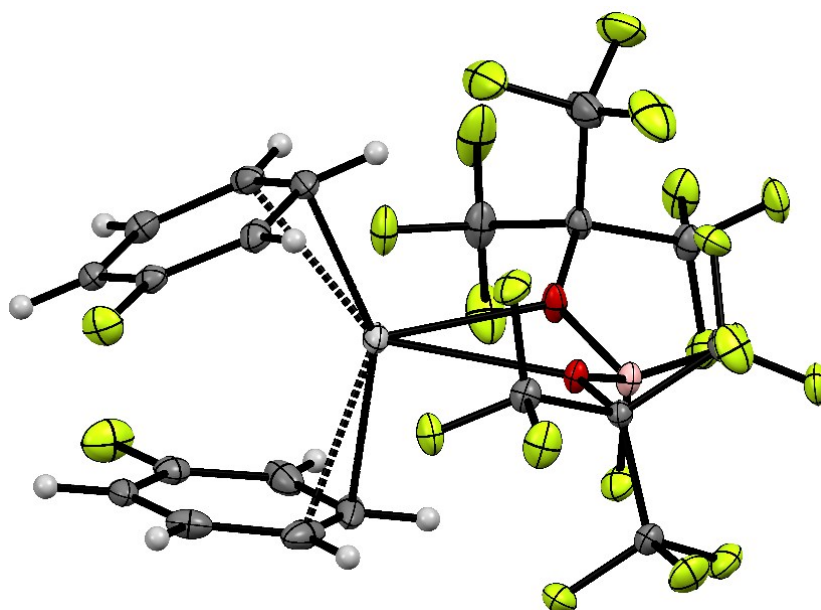

Figure S- 50: Molecular structure of [Ag(PhF)<sub>2</sub>][F<sub>2</sub>B(OR<sup>F</sup>)<sub>2</sub>] with thermal ellipsoids at 50% probability level. For clarity, only one of two independent molecules of the asymmetric unit is shown and H atoms are shown as spheres of arbitrary radius. Some of the OR<sup>F</sup> groups were disordered over two positions. Only the most occupied moiety is shown. Scheme: Ag (light grey), B (pink), O (red), F (light green), C (grey), H (white).

**Table S-9.** Crystal data and structure refinement for [Ag(PhF)<sub>2</sub>][F<sub>2</sub>B(OR<sup>F</sup>)<sub>2</sub>].

|                   |                                                                     |
|-------------------|---------------------------------------------------------------------|
| CCDC number       | CCDC 1845815                                                        |
| Empirical formula | C <sub>20</sub> H <sub>10</sub> Ag B F <sub>22</sub> O <sub>2</sub> |
| Formula weight    | 818.96                                                              |

|                                   |                                             |                    |
|-----------------------------------|---------------------------------------------|--------------------|
| Temperature                       | 100(2) K                                    |                    |
| Wavelength                        | 71.073 pm                                   |                    |
| Crystal system                    | Monoclinic                                  |                    |
| Space group                       | $P2_1/c$                                    |                    |
| Unit cell dimensions              | a = 3437.12(10) pm                          | a = 90°.           |
|                                   | b = 1064.65(3) pm                           | b = 100.4520(10)°. |
|                                   | c = 1378.45(4) pm                           | g = 90°.           |
| Volume                            | 4.9605(2) nm <sup>3</sup>                   |                    |
| Z                                 | 8                                           |                    |
| Density (calculated)              | 2.193 Mg/m <sup>3</sup>                     |                    |
| Absorption coefficient            | 1.000 mm <sup>-1</sup>                      |                    |
| F(000)                            | 3168                                        |                    |
| Crystal size                      | 0.400 x 0.250 x 0.200 mm <sup>3</sup>       |                    |
| Theta range for data collection   | 1.205 to 32.351°.                           |                    |
| Index ranges                      | -48<=h<=49, -14<=k<=15, -19<=l<=20          |                    |
| Reflections collected             | 123649                                      |                    |
| Independent reflections           | 15178 [R(int) = 0.0187]                     |                    |
| Completeness to theta = 25.242°   | 100.0 %                                     |                    |
| Absorption correction             | Semi-empirical from equivalents             |                    |
| Max. and min. transmission        | 0.7464 and 0.6502                           |                    |
| Refinement method                 | Full-matrix least-squares on F <sup>2</sup> |                    |
| Data / restraints / parameters    | 15178 / 3333 / 893                          |                    |
| Goodness-of-fit on F <sup>2</sup> | 1.141                                       |                    |
| Final R indices [I>2sigma(I)]     | R1 = 0.0265, wR2 = 0.0568                   |                    |
| R indices (all data)              | R1 = 0.0306, wR2 = 0.0581                   |                    |
| Extinction coefficient            | n/a                                         |                    |
| Largest diff. peak and hole       | 0.608 and -1.121 e.Å <sup>-3</sup>          |                    |

### Crystal Structure of [Ag(*t*Bu<sub>3</sub>SiBr)<sub>2</sub>(CH<sub>2</sub>Cl<sub>2</sub>)<sub>2</sub>][*al-f-al*]

The reaction of Ag[*al-f-al*] with Me<sub>3</sub>SiBr in CH<sub>2</sub>Cl<sub>2</sub> yielded crystals of [Ag(*t*Bu<sub>3</sub>SiBr)<sub>2</sub>(CH<sub>2</sub>Cl<sub>2</sub>)<sub>2</sub>][*al-f-al*] suited for SC-XRD from the reaction solution by storage at -40°C. Equivalent C-C and C-F bond distances and thermal ellipsoids in the disordered OR<sup>F</sup> groups were equalized by using SADI, SIMU and RIGU commands.

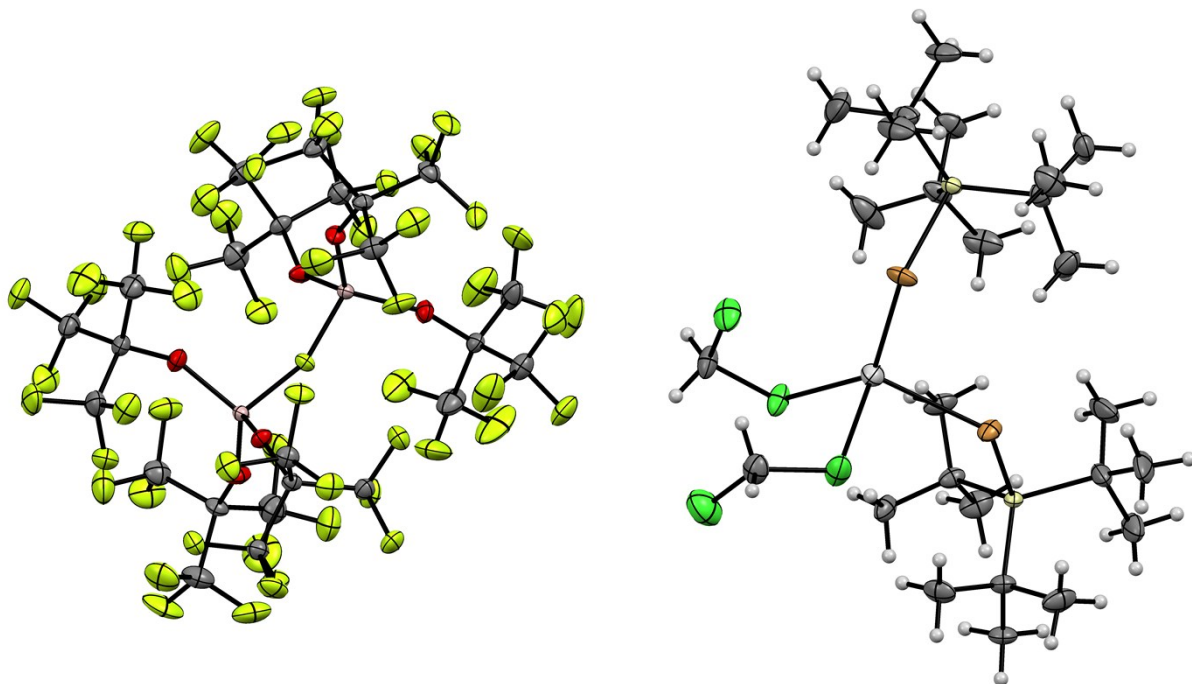

Figure S- 51: Molecular structure of  $[\text{Ag}(\text{tBu}_3\text{SiBr})_2(\text{CH}_2\text{Cl}_2)_2][\text{al-f-al}]$  with thermal ellipsoids at 50% probability level. H atoms are shown as spheres of arbitrary radius. Scheme: Ag (light grey), Al (pink), O (red), F (light green), Cl (green), Br (brown), C (grey), H (white).

**Table S-10.** Crystal data and structure refinement for  $[\text{Ag}(\text{tBu}_3\text{SiBr})_2(\text{CH}_2\text{Cl}_2)_2][\text{al-f-al}]$ .

|                                 |                                    |                 |
|---------------------------------|------------------------------------|-----------------|
| CCDC number                     | CCDC 1845816                       |                 |
| Empirical formula               | C50 H58 Ag Al2 Br2 Cl4 F55 O6 Si2  |                 |
| Formula weight                  | 2319.57                            |                 |
| Temperature                     | 100(2) K                           |                 |
| Wavelength                      | 71.073 pm                          |                 |
| Crystal system                  | Triclinic                          |                 |
| Space group                     | P-1                                |                 |
| Unit cell dimensions            | a = 1547.60(18) pm                 | a = 89.488(4)°. |
|                                 | b = 1661.5(2) pm                   | b = 67.742(4)°. |
|                                 | c = 1829.67(19) pm                 | g = 70.537(4)°. |
| Volume                          | 4.0680(8) nm <sup>3</sup>          |                 |
| Z                               | 2                                  |                 |
| Density (calculated)            | 1.894 Mg/m <sup>3</sup>            |                 |
| Absorption coefficient          | 1.582 mm <sup>-1</sup>             |                 |
| F(000)                          | 2280.0                             |                 |
| Crystal size                    | 0.39 x 0.39 x 0.27 mm <sup>3</sup> |                 |
| Theta range for data collection | 1.214 to 26.099°.                  |                 |
| Index ranges                    | -19<=h<=19, -20<=k<=20, -18<=l<=22 |                 |
| Reflections collected           | 85154                              |                 |
| Independent reflections         | 16093 [R(int) = 0.0181]            |                 |

|                                   |                                             |
|-----------------------------------|---------------------------------------------|
| Completeness to theta = 25.242°   | 100.0 %                                     |
| Absorption correction             | Semi-empirical from equivalents             |
| Max. and min. transmission        | 0.7453 and 0.6110                           |
| Refinement method                 | Full-matrix least-squares on F <sup>2</sup> |
| Data / restraints / parameters    | 16093 / 5916 / 1117                         |
| Goodness-of-fit on F <sup>2</sup> | 1.029                                       |
| Final R indices [I>2sigma(I)]     | R1 = 0.0272, wR2 = 0.0665                   |
| R indices (all data)              | R1 = 0.0327, wR2 = 0.0693                   |
| Extinction coefficient            | n/a                                         |
| Largest diff. peak and hole       | 0.753 and -0.621 e.Å <sup>-3</sup>          |

## Quantum Chemical Calculations

DFT optimizations were carried out with TURBOMOLE<sup>[QC 1,2]</sup> using the BP86<sup>[QC 3,4]</sup> density functional (RI approximation<sup>[QC 5a]</sup>) in combination with the def-SV(P) basis set<sup>[QC 5b,c]</sup> and D3 dispersion correction with Becke-Johnson damping.<sup>[QC 5d,e]</sup> Vibrational frequencies were calculated analytically with the AOFORCE<sup>[QC 6,7]</sup> module and all structures represented true minima without imaginary frequencies on the respective hypersurface. Thermodynamic terms were calculated with inclusion of zero-point energy and thermal contributions to the enthalpy/entropy (FREEH tool; unscaled BP86 vibrational frequencies). Solvation effects were calculated using the COSMO<sup>[QC 8]</sup> module combined with a geometry optimization. Default options and standard optimized COSMO radii included in the module were used. For Al a radius of 1.404 Å was used. For the calculation of the reaction energies in solution FREEH enthalpy/entropy of the gas phase calculation were used for the COSMO calculations.

[QC 1] O. Treutler, R. Ahlrichs, *J. Chem. Phys.* **1995**, *102*, 346.

[QC 2] R. Ahlrichs, M. Baer, M. Haeser, H. Horn, C. Koelmel, *Chem. Phys. Lett.* **1989**, *162*, 165.

[QC 3] J. P. Perdew, *Phys. Rev. B* **1986**, *34*.

[QC 4] A. D. Becke, *Phys. Rev. A: Gen. Phys.* **1988**, *38*, 3098.

[QC 5] a) K. Eichkorn, O. Treutler, H. Oehm, M. Haeser, R. Ahlrichs, *Chem. Phys. Lett.* **1995**, *242*, 652; b) A. Schäfer, H. Horn, R. Ahlrichs, *J. Chem. Phys.* **1992**, *97*, 2571-2577; c) A. Schäfer, C. Huber, R. Ahlrichs, *The Journal of Chemical Physics* **1994**, *100*, 5829; d) S. Grimme, J. Antony, S. Ehrlich, H. Krieg, *The Journal of Chemical Physics* **2010**, *132*, 154104; e) S. Grimme, S. Ehrlich, L. Goerigk, *Journal of Computational chemistry* **2011**, *32*, 1456.

[QC 6] P. Deglmann, F. Furche, R. Ahlrichs, *Chem. Phys. Lett.* **2002**, *362*, 511.

[QC 7] P. Deglmann, F. Furche, *J. Chem. Phys.* **2002**, *117*, 9535.

[QC 8] A. Klamt, G. Schueuermann, *J. Chem. Soc., Perkin Trans. 2* **1993**, 799.

[QC 9] A. Schäfer, A. Klamt, D. Sattel, J. C. W. Lohrenz, F. Eckert, *Phys. Chem. Chem. Phys.* **2000**, *2*, 2187.

Calculations of the FIA

The fluoride ion affinity (FIA)<sup>[FIA 1]</sup> for  $[al-f-al]^-$  was calculated by the following reaction (BP86-D3(BJ)/def-SV(P)):

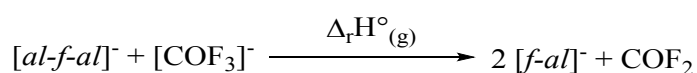

After subtracting the FIA of COF<sub>2</sub> (FIA = 209 kJ·mol<sup>-1</sup> <sup>[FIA 2]</sup>) from  $\Delta H$  the FIAs for  $[al-f-al]^-$  were obtained.

[FIA 1] T. E. Mallouk, G. L. Rosenthal, G. Mueller, R. Brusasco, N. Bartlett, *Inorg. Chem.* **1984**, *23*, 3167.

[FIA 2] K. O. Christe, D. A. Dixon, D. McLemore, W. W. Wilson, J. A. Sheehy, J. A. Boatz, *J. Fluorine Chem.* **2000**, *101*, 151.

### Optimized coordinates and energies of the calculated compounds:

Atomic coordinates are given in Å, SCF energies are given in Hartree, the FREEH energy is given in kJ mol<sup>-1</sup>, and the FREEH entropy is given in kJ mol<sup>-1</sup> K<sup>-1</sup>.  $H^0_{(g)}$ ,  $G^0_{(g)}$  and  $G^0_{(solv)}$  are calculated by the following equations:

$$H^0_{(g)} = \text{SCF energy} + \text{FREEH energy} + R \cdot T$$

$$G^0_{(g)} = \text{SCF energy} + \text{FREEH energy} + R \cdot T - T \cdot \text{FREEH entropy}$$

$$G^0_{solv} = G^0_{(g)} + \Delta_{solv}G^0 \quad \text{with } \Delta_{solv}G^0 = \text{COSMO energy} - \text{SCF energy} + 7.96 \text{ kJ mol}^{-1}$$

#### BP86/def-SV(P)

#### COF<sub>2</sub>

|   |          |         |          |
|---|----------|---------|----------|
| C | 0.00000  | 0.00000 | 0.09545  |
| O | 0.00000  | 0.00000 | 1.28032  |
| F | 1.07294  | 0.00000 | -0.68794 |
| F | -1.07294 | 0.00000 | -0.68794 |

SCF energy = -312.8029859210

FREEH energy = 44.84

FREEH entropy = 0.25983

#### [COF<sub>3</sub>]<sup>-</sup>

|   |          |          |          |
|---|----------|----------|----------|
| C | -0.00000 | 0.00000  | 0.15221  |
| O | 0.00000  | 0.00000  | 1.37582  |
| F | 0.64255  | 1.11292  | -0.50932 |
| F | 0.64255  | -1.11292 | -0.50932 |
| F | -1.28509 | 0.00000  | -0.50932 |

SCF energy = -412.6373271036

FREEH energy = 51.64

FREEH entropy = 0.27750

#### [F-Al(OR<sup>F</sup>)<sub>3</sub>]<sup>-</sup> ([f-al]<sup>-</sup>)

|    |          |          |          |
|----|----------|----------|----------|
| F  | -1.17384 | -0.56180 | 2.06645  |
| Al | -0.37466 | -0.19700 | 0.62257  |
| O  | 1.34539  | 0.16068  | 0.88528  |
| C  | 2.22788  | 1.01979  | 1.43362  |
| C  | 3.58122  | 0.24022  | 1.67007  |
| F  | 3.34554  | -0.95781 | 2.22511  |
| F  | 4.22474  | 0.03104  | 0.50069  |
| F  | 4.43321  | 0.91281  | 2.48602  |
| C  | 2.49781  | 2.23142  | 0.45234  |
| F  | 1.49218  | 3.12971  | 0.50444  |
| F  | 3.64706  | 2.89319  | 0.74832  |
| F  | 2.59105  | 1.79482  | -0.81278 |
| C  | 1.71556  | 1.58266  | 2.81632  |
| F  | 0.43076  | 1.96553  | 2.71691  |

|   |          |          |          |
|---|----------|----------|----------|
| F | 1.78676  | 0.63781  | 3.77811  |
| F | 2.43304  | 2.65241  | 3.24216  |
| O | -1.07359 | 1.20505  | -0.21565 |
| C | -2.20914 | 1.75431  | -0.69256 |
| C | -2.97702 | 2.52008  | 0.45915  |
| F | -3.63510 | 1.65360  | 1.25912  |
| F | -3.89136 | 3.40189  | -0.02215 |
| F | -2.11278 | 3.20379  | 1.22462  |
| C | -1.81139 | 2.78641  | -1.81989 |
| F | -1.28624 | 3.90868  | -1.28059 |
| F | -0.88854 | 2.25872  | -2.63759 |
| F | -2.87275 | 3.16172  | -2.57889 |
| C | -3.17167 | 0.66615  | -1.31127 |
| F | -3.25964 | -0.39523 | -0.49066 |
| F | -4.42861 | 1.13614  | -1.51264 |
| F | -2.70713 | 0.23004  | -2.50023 |
| O | -0.42666 | -1.53942 | -0.54014 |
| C | 0.01125  | -2.78195 | -0.82391 |
| C | -0.05411 | -3.72336 | 0.44095  |
| F | -1.33207 | -4.04818 | 0.73322  |
| F | 0.63063  | -4.88154 | 0.26597  |
| F | 0.46215  | -3.10065 | 1.51453  |
| C | 1.50014  | -2.74228 | -1.35980 |
| F | 1.67211  | -1.69589 | -2.18087 |
| F | 2.37885  | -2.61949 | -0.34308 |
| F | 1.83381  | -3.86716 | -2.04585 |
| C | -0.92139 | -3.37406 | -1.95318 |
| F | -2.21192 | -3.13650 | -1.67439 |
| F | -0.64925 | -2.80130 | -3.14651 |
| F | -0.77227 | -4.71504 | -2.10334 |

SCF energy = -3718.877857464

FREEH energy = 548.64

FREEH entropy = 1.14241

#### [(R<sup>F</sup>O)<sub>3</sub>Al-F-Al(OR<sup>F</sup>)<sub>3</sub>]<sup>-</sup> ([al-f-al]<sup>-</sup>)

|    |            |            |            |
|----|------------|------------|------------|
| Al | -1.1769512 | 0.0308906  | -1.3973779 |
| O  | -0.8456166 | -1.5135007 | -2.1443676 |
| O  | -2.8022558 | 0.0654694  | -0.7670515 |



|    |            |            |            |                              |            |            |            |
|----|------------|------------|------------|------------------------------|------------|------------|------------|
| O  | -0.8165503 | 1.4722058  | -2.3005314 | F                            | 2.3387546  | -2.3133159 | -0.7497796 |
| C  | -0.0001128 | 2.2963848  | -3.0038569 | C                            | 4.5317635  | -0.1017120 | -0.8865742 |
| C  | 0.9158968  | 1.4726984  | -3.9897976 | F                            | 4.5560399  | 1.2274934  | -0.7184974 |
| F  | 1.3793645  | 0.3737025  | -3.3677301 | C                            | 4.8462618  | -0.8174880 | 1.5639355  |
| F  | 1.9756585  | 2.1856656  | -4.4277871 | F                            | 4.1872847  | -1.0582576 | 2.7095948  |
| F  | 0.2162077  | 1.0693251  | -5.0698737 | F                            | 5.4682428  | 0.3726734  | 1.6919523  |
| C  | -0.8934728 | 3.2930619  | -3.8394615 | F                            | 5.8019543  | -1.7651204 | 1.4218414  |
| F  | -1.4246146 | 4.2455122  | -3.0463697 | F                            | 3.8524299  | -0.3644859 | -2.0209716 |
| C  | 0.9060847  | 3.1148610  | -2.0066874 | F                            | 5.8065557  | -0.5252234 | -1.0604124 |
| F  | 1.8791987  | 2.3187567  | -1.5126155 | C                            | 1.2560960  | 2.5022868  | 2.9776766  |
| F  | 0.1754654  | 3.5595512  | -0.9755685 | C                            | 0.0423618  | -2.3103053 | 3.0388762  |
| F  | 1.4962994  | 4.1769121  | -2.5977608 | C                            | -0.8479420 | -3.1148883 | 2.0168127  |
| F  | -1.9041653 | 2.6381764  | -4.4292240 | F                            | -1.8378625 | -2.3246737 | 1.5485794  |
| F  | -0.1765391 | 3.9174390  | -4.8042440 | F                            | -1.4130587 | -4.2095486 | 2.5701105  |
| C  | -3.8749571 | 0.7938390  | -0.3636183 | F                            | -0.1053548 | -3.5077154 | 0.9716699  |
| C  | -1.2804879 | -2.4718806 | -3.0046733 | C                            | 0.9579162  | -3.3127820 | 3.8426900  |
| C  | -0.1232209 | -2.7897532 | -4.0320991 | F                            | 1.5072606  | -4.2302061 | 3.0213268  |
| F  | -0.0447081 | -1.8216788 | -4.9712247 | F                            | 0.2551402  | -3.9804770 | 4.7889012  |
| F  | -0.3224987 | -3.9654927 | -4.6736393 | F                            | 1.9558211  | -2.6552051 | 4.4499560  |
| F  | 1.0578406  | -2.8519686 | -3.4059847 | C                            | -0.8913563 | -1.5386959 | 4.0509056  |
| C  | -1.6281599 | -3.7839969 | -2.1989740 | F                            | -1.3688281 | -0.4239341 | 3.4716630  |
| F  | -0.5052801 | -4.4140560 | -1.8017827 | F                            | -0.2036614 | -1.1666176 | 5.1511225  |
| F  | -2.3471729 | -4.6571942 | -2.9449565 | F                            | -1.9407688 | -2.2857934 | 4.4561852  |
| F  | -2.3451016 | -3.4850368 | -1.1051634 | C                            | 1.6263140  | 1.9084861  | 4.3928212  |
| C  | -2.5622872 | -2.0068175 | -3.8004038 | F                            | 0.5179711  | 1.6312605  | 5.1077490  |
| F  | -2.4348845 | -0.7098890 | -4.1458416 | F                            | 2.3873923  | 2.7501598  | 5.1258455  |
| F  | -3.6717466 | -2.1191393 | -3.0441170 | F                            | 2.3102762  | 0.7576156  | 4.2379679  |
| F  | -2.7592908 | -2.7218948 | -4.9290497 | C                            | 0.0859150  | 3.5470990  | 3.1462307  |
| C  | -3.4906616 | 1.6945785  | 0.8730349  | F                            | -1.0807527 | 2.9190886  | 3.3481198  |
| F  | -3.3928663 | 0.9527921  | 1.9925113  | F                            | -0.0369406 | 4.3089350  | 2.0419670  |
| F  | -4.3932061 | 2.6734429  | 1.1010505  | F                            | 0.3026467  | 4.3753675  | 4.1967715  |
| F  | -2.2933025 | 2.2703539  | 0.6553912  | C                            | 2.5247281  | 3.2318552  | 2.3828198  |
| C  | -5.0114697 | -0.2173822 | 0.0562022  | F                            | 3.6264948  | 2.4675361  | 2.5440027  |
| F  | -4.5068553 | -1.2172113 | 0.7899843  | F                            | 2.7589965  | 4.4212310  | 2.9841460  |
| F  | -5.5924483 | -0.7598758 | -1.0355670 | F                            | 2.3672794  | 3.4533807  | 1.0713599  |
| F  | -5.9825887 | 0.3883460  | 0.7799767  | F                            | -0.0438820 | -0.0145512 | 0.0328987  |
| C  | -4.4094679 | 1.7150296  | -1.5300262 | SCF energy = -7337.852033461 |            |            |            |
| F  | -3.6369840 | 2.8125950  | -1.6663649 | FREEH energy = 1097.70       |            |            |            |
| F  | -5.6777392 | 2.1326491  | -1.3094927 | FREEH entropy = 2.02172      |            |            |            |
| F  | -4.3876989 | 1.0505306  | -2.6960578 |                              |            |            |            |
| Al | 1.1566533  | -0.0278995 | 1.4096989  |                              |            |            |            |
| O  | 0.8411298  | -1.4464032 | 2.3638941  | <b>BP86-D3(BJ)/def-SV(P)</b> |            |            |            |
| O  | 0.8255421  | 1.5235800  | 2.1392498  |                              |            |            |            |
| O  | 2.7310456  | -0.0883369 | 0.6653033  | <b>COF<sub>2</sub></b>       |            |            |            |
| C  | 3.8412537  | -0.8034377 | 0.3469761  | C                            | 0.00000    | 0.00000    | 0.09548    |
| C  | 3.4789081  | -2.2921437 | -0.0403668 | O                            | 0.00000    | 0.00000    | 1.28034    |
| F  | 3.2907213  | -3.0454979 | 1.0630382  | F                            | -1.07291   | 0.00000    | -0.68791   |
| F  | 4.4466037  | -2.8813339 | -0.7768669 |                              |            |            |            |

F 1.07291 0.00000 -0.68791  
 SCF energy = -312.8049642616  
 FREEH energy = 44.85  
 FREEH entropy = 0.25983

**[COF<sub>3</sub>]<sup>-</sup>**

C -0.00000 0.00000 0.15219  
 O 0.00000 0.00000 1.37577  
 F 0.64252 1.11288 -0.50932  
 F 0.64252 -1.11288 -0.50932  
 F -1.28504 0.00000 -0.50932  
 SCF energy GEOPT = -412.6401543431  
 FREEH energy = 51.64  
 FREEH entropy = 0.27749

**[F-Al(OR<sup>f</sup>)<sub>3</sub>]<sup>-</sup> ([f-al]<sup>-</sup>)**

F -1.2738272 -0.6714239 2.2510177  
 Al -0.4718268 -0.2744813 0.8172892  
 O 1.2620204 -0.0179498 1.0788598  
 C 2.1458432 0.9215402 1.4683591  
 C 3.5255737 0.2022785 1.7138275  
 F 3.3472567 -0.9406692 2.3922319  
 F 4.1204570 -0.1054052 0.5407688  
 F 4.3938250 0.9713118 2.4197374  
 C 2.3324118 2.0209381 0.3489329  
 F 1.3329373 2.9252657 0.3803841  
 F 3.4986997 2.7051562 0.4895264  
 F 2.3339825 1.4499231 -0.8640742  
 C 1.6845771 1.6205254 2.8013419  
 F 0.3810553 1.9431310 2.7273052  
 F 1.8391666 0.7925913 3.8571385  
 F 2.3786939 2.7543926 3.0662864  
 O -1.0905694 1.2042932 0.0677088  
 C -2.1350716 1.7312665 -0.5994829  
 C -2.9648798 2.6468952 0.3794516  
 F -3.7167885 1.8938344 1.2122042  
 F -3.8024047 3.4909053 -0.2760115  
 F -2.1435188 3.3900840 1.1359503  
 C -1.5748322 2.6064060 -1.7834252  
 F -1.0555565 3.7652021 -1.3223843  
 F -0.6000405 1.9508151 -2.4290237  
 F -2.5344784 2.9265567 -2.6893291  
 C -3.0847104 0.6199578 -1.1909132

F -3.2889942 -0.3451835 -0.2767409  
 F -4.2976488 1.1108400 -1.5492701  
 F -2.5405617 0.0478163 -2.2827830  
 O -0.6043950 -1.5506558 -0.4047313  
 C -0.0367129 -2.6961743 -0.8275246  
 C 0.0737515 -3.7386217 0.3461934  
 F -1.1407937 -4.2397725 0.6602270  
 F 0.8808039 -4.7852141 0.0430702  
 F 0.5639379 -3.1446837 1.4485203  
 C 1.4053327 -2.4373821 -1.4222633  
 F 1.4213963 -1.2880255 -2.1115962  
 F 2.3308597 -2.3517075 -0.4458716  
 F 1.7998105 -3.4322977 -2.2608453  
 C -0.9578384 -3.2861144 -1.9610578  
 F -2.2490448 -3.2162343 -1.6039331  
 F -0.8115824 -2.5852608 -3.1065222  
 F -0.6763159 -4.5846690 -2.2385488  
 SCF energy = -3718.966567137  
 FREEH energy = 549.69  
 FREEH entropy = 1.12307

**[(R<sup>f</sup>O)<sub>3</sub>Al-F-Al(OR<sup>f</sup>)<sub>3</sub>]<sup>-</sup> ([al-f-al]<sup>-</sup>)**

Al -1.18955 -0.09642 -1.36439  
 O -0.86225 -1.68221 -2.01450  
 O -2.81669 -0.05962 -0.74571  
 O -0.88280 1.31839 -2.32615  
 C 0.04456 2.09689 -2.93609  
 C 1.01895 1.21544 -3.80323  
 F 1.35061 0.10500 -3.11627  
 F 2.15536 1.86352 -4.13026  
 F 0.42025 0.82509 -4.94636  
 C -0.70993 3.11338 -3.86899  
 F -1.27631 4.10150 -3.14735  
 C 0.86847 2.88511 -1.85255  
 F 1.73638 2.04529 -1.24564  
 F 0.05000 3.37663 -0.91387  
 F 1.57522 3.90653 -2.38139  
 F -1.68315 2.49236 -4.55021  
 F 0.13096 3.68865 -4.76179  
 C -3.79283 0.77727 -0.31031  
 C -1.36217 -2.59332 -2.88913  
 C -0.22187 -2.97585 -3.90612  
 F -0.05597 -1.99182 -4.81662  
 F -0.50088 -4.11654 -4.58015  
 F 0.94106 -3.14423 -3.26582  
 C -1.81348 -3.88048 -2.10306  
 F -0.74681 -4.59899 -1.70241

|    |          |          |          |
|----|----------|----------|----------|
| F  | -2.58802 | -4.68762 | -2.86784 |
| F  | -2.51806 | -3.53975 | -1.01317 |
| C  | -2.59888 | -2.02461 | -3.68537 |
| F  | -2.37778 | -0.72759 | -3.98578 |
| F  | -3.72433 | -2.08343 | -2.94848 |
| F  | -2.82476 | -2.68820 | -4.83862 |
| C  | -3.27836 | 1.62075  | 0.91439  |
| F  | -3.21964 | 0.86287  | 2.02467  |
| F  | -4.06294 | 2.68698  | 1.17638  |
| F  | -2.03339 | 2.06650  | 0.65510  |
| C  | -5.00759 | -0.11702 | 0.13507  |
| F  | -4.58280 | -1.16461 | 0.85268  |
| F  | -5.66377 | -0.59552 | -0.94408 |
| F  | -5.89685 | 0.57577  | 0.88507  |
| C  | -4.25787 | 1.75377  | -1.45783 |
| F  | -3.39392 | 2.77931  | -1.59818 |
| F  | -5.48037 | 2.28092  | -1.21157 |
| F  | -4.31412 | 1.09965  | -2.62819 |
| Al | 1.16065  | 0.08085  | 1.37715  |
| O  | 0.96096  | -1.35999 | 2.32687  |
| O  | 0.70186  | 1.61933  | 2.05777  |
| O  | 2.74710  | 0.14376  | 0.67343  |
| C  | 3.83315  | -0.58344 | 0.31149  |
| C  | 3.41501  | -1.98269 | -0.28450 |
| F  | 3.13738  | -2.86290 | 0.69915  |
| F  | 4.38302  | -2.52165 | -1.05687 |
| F  | 2.30665  | -1.84322 | -1.03076 |
| C  | 4.61014  | 0.23790  | -0.78444 |
| F  | 4.67696  | 1.53126  | -0.44142 |
| C  | 4.76681  | -0.80512 | 1.55858  |
| F  | 4.03923  | -1.17172 | 2.62564  |
| F  | 5.41711  | 0.33288  | 1.87923  |
| F  | 5.69703  | -1.76165 | 1.33317  |
| F  | 3.97863  | 0.15588  | -1.97294 |
| F  | 5.87412  | -0.21721 | -0.95588 |
| C  | 1.13558  | 2.55689  | 2.93950  |
| C  | 0.10471  | -2.25317 | 2.88107  |
| C  | -0.81162 | -2.87798 | 1.76575  |
| F  | -1.75417 | -1.98348 | 1.39338  |
| F  | -1.43730 | -4.00045 | 2.17473  |
| F  | -0.07375 | -3.17118 | 0.68522  |
| C  | 0.95883  | -3.38511 | 3.56081  |
| F  | 1.47566  | -4.21887 | 2.63629  |
| F  | 0.21320  | -4.12846 | 4.41315  |
| F  | 1.97800  | -2.85391 | 4.25065  |
| C  | -0.79219 | -1.55013 | 3.96695  |
| F  | -1.20612 | -0.35624 | 3.50729  |
| F  | -0.09219 | -1.33160 | 5.09962  |

|   |          |          |         |
|---|----------|----------|---------|
| F | -1.88153 | -2.27974 | 4.28872 |
| C | 1.52628  | 1.89395  | 4.31420 |
| F | 0.43157  | 1.56789  | 5.02739 |
| F | 2.29360  | 2.69687  | 5.08109 |
| F | 2.21502  | 0.75610  | 4.08318 |
| C | -0.04084 | 3.57515  | 3.16649 |
| F | -1.19544 | 2.92352  | 3.36628 |
| F | -0.19326 | 4.37344  | 2.09291 |
| F | 0.18441  | 4.36631  | 4.24339 |
| C | 2.39185  | 3.31945  | 2.36695 |
| F | 3.49438  | 2.54701  | 2.46631 |
| F | 2.63501  | 4.47280  | 3.03195 |
| F | 2.21246  | 3.61711  | 1.07372 |
| F | -0.03161 | -0.03819 | 0.02147 |

SCF energy = -7338.054736403  
 FREEH energy = 1100.04  
 FREEH entropy = 1.97596

**[PF<sub>6</sub>]<sup>-</sup>**

|   |          |          |          |
|---|----------|----------|----------|
| P | 0.00000  | 0.00000  | -0.00000 |
| F | 0.00000  | -1.65285 | 0.00000  |
| F | -0.00000 | 1.65285  | -0.00000 |
| F | -0.00000 | 0.00000  | 1.65285  |
| F | -0.00000 | -0.00000 | -1.65285 |
| F | -1.65285 | -0.00000 | 0.00000  |
| F | 1.65285  | 0.00000  | -0.00000 |

SCF energy = -940.1613250131  
 FREEH energy = 66.14  
 FREEH entropy = 0.30326

**PF<sub>5</sub>**

|   |          |          |          |
|---|----------|----------|----------|
| P | -0.00000 | 0.00000  | -0.00000 |
| F | -0.79557 | 1.37797  | 0.00000  |
| F | 0.00000  | 0.00000  | 1.61284  |
| F | -0.79557 | -1.37797 | 0.00000  |
| F | 1.59115  | 0.00000  | 0.00000  |
| F | 0.00000  | 0.00000  | -1.61284 |

SCF energy = -840.2548119432  
 FREEH energy = 57.04  
 FREEH entropy = 0.30760

**Me<sub>3</sub>Si-F-Al(OR<sup>F</sup>)<sub>3</sub>**

|    |          |         |          |
|----|----------|---------|----------|
| Si | -0.57827 | 0.07487 | -2.91554 |
| C  | 0.81813  | 1.29983 | -3.06793 |
| C  | -2.29430 | 0.79924 | -2.82863 |

|    |          |          |          |                                                      |          |          |          |
|----|----------|----------|----------|------------------------------------------------------|----------|----------|----------|
| C  | -0.38563 | -1.45969 | -3.96324 | H                                                    | -3.04517 | 0.01856  | -2.58152 |
| F  | -0.36361 | -0.61550 | -1.30225 | H                                                    | -2.57554 | 1.26192  | -3.80111 |
| Al | 0.08347  | 0.00316  | 0.39215  | H                                                    | -2.33111 | 1.58088  | -2.04063 |
| O  | -0.63045 | -1.18916 | 1.41006  | H                                                    | -0.49026 | -1.21648 | -5.04424 |
| C  | -1.61332 | -2.11331 | 1.58616  | H                                                    | -1.15318 | -2.22057 | -3.70311 |
| C  | -2.21821 | -1.91230 | 3.02730  | H                                                    | 0.61894  | -1.90890 | -3.80479 |
| F  | -3.04503 | -0.84525 | 3.03935  | SCF energy = -4128.001104893                         |          |          |          |
| F  | -1.23745 | -1.68406 | 3.90962  | FREEH energy = 861.70                                |          |          |          |
| F  | -2.92002 | -2.98950 | 3.43282  | FREEH entropy = 1.26227                              |          |          |          |
| C  | -0.98827 | -3.55263 | 1.46600  | <b>SO<sub>2</sub>-Al(OR<sup>F</sup>)<sub>3</sub></b> |          |          |          |
| F  | -1.94077 | -4.50082 | 1.34322  | S                                                    | -1.48829 | 0.74877  | -2.94386 |
| F  | -0.18956 | -3.61626 | 0.38560  | O                                                    | -0.39203 | -0.14423 | -2.35327 |
| F  | -0.24471 | -3.83830 | 2.54856  | Al                                                   | -0.00568 | -0.07092 | -0.45503 |
| C  | -2.75671 | -1.95002 | 0.51377  | O                                                    | -0.62638 | -1.55149 | 0.16327  |
| F  | -2.39387 | -2.49080 | -0.67441 | C                                                    | -1.73669 | -2.24642 | 0.53339  |
| F  | -3.90787 | -2.52513 | 0.89328  | C                                                    | -2.36861 | -1.60977 | 1.82863  |
| F  | -2.98797 | -0.63747 | 0.29009  | F                                                    | -3.06044 | -0.49283 | 1.51031  |
| O  | -0.62477 | 1.58542  | 0.09598  | F                                                    | -1.39700 | -1.25815 | 2.68275  |
| C  | -0.79217 | 2.69423  | 0.87860  | F                                                    | -3.20832 | -2.45753 | 2.44909  |
| C  | -0.52353 | 3.96505  | -0.00010 | C                                                    | -1.28789 | -3.72809 | 0.82597  |
| F  | -0.41964 | 5.07700  | 0.75112  | F                                                    | -2.34775 | -4.56083 | 0.88704  |
| F  | 0.61761  | 3.81884  | -0.69999 | F                                                    | -0.46545 | -4.15717 | -0.14057 |
| F  | -1.52334 | 4.14451  | -0.88913 | F                                                    | -0.62980 | -3.79144 | 1.99699  |
| C  | -2.26955 | 2.71823  | 1.42194  | C                                                    | -2.79073 | -2.23698 | -0.63271 |
| F  | -2.60897 | 3.91935  | 1.92688  | F                                                    | -2.37776 | -2.99328 | -1.66302 |
| F  | -2.41294 | 1.79282  | 2.39216  | F                                                    | -4.00270 | -2.65181 | -0.24797 |
| F  | -3.12987 | 2.41542  | 0.43528  | F                                                    | -2.92272 | -0.96142 | -1.11344 |
| C  | 0.21472  | 2.66600  | 2.08927  | O                                                    | -0.97202 | 1.36730  | -0.23068 |
| F  | -0.18941 | 3.38884  | 3.13852  | C                                                    | -0.93382 | 2.63907  | 0.27036  |
| F  | 0.33333  | 1.36107  | 2.49549  | C                                                    | -0.75773 | 3.63102  | -0.93504 |
| F  | 1.43908  | 3.07531  | 1.72994  | F                                                    | -0.39479 | 4.86069  | -0.55431 |
| O  | 1.80718  | 0.08521  | 0.27764  | F                                                    | 0.17968  | 3.14691  | -1.78789 |
| C  | 2.98802  | -0.58577 | 0.34625  | F                                                    | -1.90735 | 3.72192  | -1.64412 |
| C  | 4.13663  | 0.48627  | 0.25607  | C                                                    | -2.30292 | 2.91070  | 0.99619  |
| F  | 4.24530  | 1.15548  | 1.41932  | F                                                    | -2.50807 | 4.22824  | 1.19161  |
| F  | 3.85813  | 1.38064  | -0.70753 | F                                                    | -2.32578 | 2.29279  | 2.19109  |
| F  | 5.32917  | -0.07847 | -0.02156 | F                                                    | -3.31587 | 2.42801  | 0.25900  |
| C  | 3.10487  | -1.37786 | 1.70358  | C                                                    | 0.25426  | 2.81940  | 1.28920  |
| F  | 4.37641  | -1.72361 | 1.98012  | F                                                    | 0.05363  | 3.85760  | 2.11774  |
| F  | 2.36507  | -2.50618 | 1.65271  | F                                                    | 0.37742  | 1.69692  | 2.02586  |
| F  | 2.63603  | -0.62688 | 2.71260  | F                                                    | 1.41645  | 3.01824  | 0.64025  |
| C  | 3.10521  | -1.59217 | -0.85761 | O                                                    | 1.68869  | 0.20200  | -0.34683 |
| F  | 4.09632  | -2.48236 | -0.69433 | C                                                    | 2.88822  | -0.45395 | -0.33939 |
| F  | 1.94618  | -2.26646 | -1.01013 | C                                                    | 4.01612  | 0.64058  | -0.32776 |
| F  | 3.32633  | -0.92919 | -2.01980 | F                                                    | 4.11012  | 1.20478  | 0.89126  |
| H  | 0.66103  | 2.17134  | -2.40011 | F                                                    | 3.72904  | 1.60860  | -1.21079 |
| H  | 0.89166  | 1.66696  | -4.11658 | F                                                    | 5.21632  | 0.11445  | -0.64507 |
| H  | 1.78663  | 0.82866  | -2.79720 |                                                      |          |          |          |

|   |          |          |          |
|---|----------|----------|----------|
| C | 3.00334  | -1.35857 | 0.94523  |
| F | 4.27697  | -1.70657 | 1.20277  |
| F | 2.28092  | -2.48850 | 0.79032  |
| F | 2.51155  | -0.70390 | 2.00949  |
| C | 3.01211  | -1.34177 | -1.63013 |
| F | 3.99628  | -2.24939 | -1.53976 |
| F | 1.84450  | -1.99788 | -1.83258 |
| F | 3.23214  | -0.57764 | -2.71690 |
| O | -1.56117 | 0.65256  | -4.40668 |

SCF energy = -4167.460872852  
 FREEH energy = 574.79  
 FREEH entropy = 1.19123

**Me<sub>3</sub>SiF**

|    |          |          |          |
|----|----------|----------|----------|
| Si | 0.00000  | 0.00000  | 0.43615  |
| C  | 0.89923  | -1.55750 | -0.12092 |
| C  | 0.89923  | 1.55750  | -0.12092 |
| C  | -1.79845 | 0.00000  | -0.12092 |
| F  | 0.00000  | 0.00000  | 2.09156  |
| H  | 0.38884  | -2.47196 | 0.25515  |
| H  | 1.94636  | -1.57273 | 0.25515  |
| H  | 0.93580  | -1.62086 | -1.23196 |
| H  | 0.38884  | 2.47196  | 0.25515  |
| H  | 1.94636  | 1.57273  | 0.25515  |
| H  | 0.93580  | 1.62086  | -1.23196 |
| H  | -2.33520 | 0.89923  | 0.25515  |
| H  | -2.33520 | -0.89923 | 0.25515  |
| H  | -1.87161 | 0.00000  | -1.23196 |

SCF energy = -508.9439675558  
 FREEH energy = 310.97  
 FREEH entropy = 0.35436

**Me<sub>3</sub>SiCl**

|    |          |          |          |
|----|----------|----------|----------|
| Si | -0.00000 | 0.00000  | 0.41132  |
| C  | -0.89960 | 1.55815  | -0.15263 |
| C  | -0.89960 | -1.55815 | -0.15263 |
| C  | 1.79920  | 0.00000  | -0.15263 |
| Cl | -0.00000 | 0.00000  | 2.52137  |
| H  | -0.38813 | 2.47112  | 0.22369  |
| H  | -1.94598 | 1.57169  | 0.22369  |
| H  | -0.93051 | 1.61169  | -1.26476 |
| H  | -0.38813 | -2.47112 | 0.22369  |
| H  | -1.94598 | -1.57169 | 0.22369  |
| H  | -0.93051 | -1.61169 | -1.26476 |
| H  | 2.33412  | -0.89942 | 0.22369  |
| H  | 2.33412  | 0.89942  | 0.22369  |

|   |         |         |          |
|---|---------|---------|----------|
| H | 1.86102 | 0.00000 | -1.26476 |
|---|---------|---------|----------|

SCF energy = -869.2788899828  
 FREEH energy = 309.53  
 FREEH entropy = 0.36300

**[Me<sub>3</sub>Si]<sup>+</sup>**

|    |          |          |          |
|----|----------|----------|----------|
| Si | 0.00006  | -0.00003 | -0.00021 |
| C  | 0.51998  | 1.76879  | -0.06424 |
| C  | -1.78926 | -0.43927 | -0.09310 |
| C  | 1.26932  | -1.32952 | 0.15720  |
| H  | 1.61855  | 1.90570  | 0.01829  |
| H  | 0.16397  | 2.22836  | -1.01858 |
| H  | 0.01433  | 2.34010  | 0.75170  |
| H  | -2.45252 | 0.44499  | -0.19619 |
| H  | -1.96271 | -1.13237 | -0.95189 |
| H  | -2.08150 | -1.01280 | 0.82026  |
| H  | 1.99773  | -1.25584 | -0.68664 |
| H  | 1.86807  | -1.16754 | 1.08657  |
| H  | 0.83396  | -2.35057 | 0.17684  |

SCF energy = -408.8229126821  
 FREEH energy = 297.91  
 FREEH entropy = 0.36826

**CH<sub>2</sub>Cl<sub>2</sub>**

|    |          |          |          |
|----|----------|----------|----------|
| C  | 0.00000  | 0.00000  | 0.14122  |
| Cl | 0.00000  | -1.49815 | -0.83682 |
| Cl | 0.00000  | 1.49815  | -0.83682 |
| H  | -0.91218 | 0.00000  | 0.76598  |
| H  | 0.91218  | 0.00000  | 0.76598  |

SCF energy = -959.4867692078  
 FREEH energy = 84.01  
 FREEH entropy = 0.27150

**[CH<sub>2</sub>Cl]<sup>+</sup>**

|    |          |          |          |
|----|----------|----------|----------|
| C  | -0.09138 | 0.09457  | 0.00000  |
| Cl | 1.02705  | -1.06324 | 0.00000  |
| H  | -0.46784 | 0.48434  | -0.97252 |
| H  | -0.46784 | 0.48434  | 0.97252  |

SCF energy = -498.9955862583  
 FREEH energy = 71.72  
 FREEH entropy = 0.23827

**BF<sub>3</sub>**

|   |          |          |         |
|---|----------|----------|---------|
| B | 0.00000  | 0.00000  | 0.00000 |
| F | -0.66177 | 1.14622  | 0.00000 |
| F | -0.66177 | -1.14622 | 0.00000 |
| F | 1.32354  | 0.00000  | 0.00000 |

SCF energy = -324.3194833005

FREEH energy = 41.39

FREEH entropy = 0.25544

**[F<sub>3</sub>B-OR<sup>f</sup>]<sup>-</sup>**

|   |          |          |          |
|---|----------|----------|----------|
| B | 0.08923  | 2.17847  | 0.81498  |
| F | -0.85419 | 3.20223  | 0.69892  |
| F | 1.37270  | 2.63815  | 0.48582  |
| F | 0.07469  | 1.61115  | 2.09872  |
| O | -0.33509 | 1.13354  | -0.21684 |
| C | -0.09374 | -0.19385 | -0.22843 |
| C | -0.82893 | -0.98140 | 0.94506  |
| F | -1.15364 | -2.25779 | 0.57198  |
| F | -1.97129 | -0.36382 | 1.27357  |
| F | -0.07460 | -1.10074 | 2.05468  |
| C | -0.70180 | -0.68988 | -1.59982 |
| F | -0.33166 | -1.95112 | -1.94265 |
| F | -0.32809 | 0.11651  | -2.60738 |
| F | -2.05455 | -0.66982 | -1.54836 |
| C | 1.43799  | -0.57035 | -0.19678 |
| F | 1.62200  | -1.92262 | -0.12281 |
| F | 2.07695  | -0.02848 | 0.84468  |
| F | 2.05401  | -0.15018 | -1.32533 |

SCF energy = -1449.918370528

FREEH energy = 217.62

FREEH entropy = 0.54990

**[F<sub>5</sub>P-OR<sup>f</sup>]<sup>-</sup>**

|   |          |          |          |
|---|----------|----------|----------|
| P | -1.40048 | -1.38388 | 1.18265  |
| F | -2.04680 | 0.13102  | 1.07000  |
| F | -0.69410 | -2.85798 | 1.26236  |
| F | -2.76500 | -1.94005 | 1.90484  |
| O | 0.10187  | -0.84120 | 0.40918  |
| C | 0.46263  | 0.26323  | -0.29813 |
| F | -0.75800 | -0.99462 | 2.64326  |
| F | -2.01985 | -1.75766 | -0.29874 |
| C | 0.38722  | 1.62922  | 0.51806  |
| F | 0.53754  | 1.39990  | 1.82552  |
| F | -0.76507 | 2.30042  | 0.32805  |
| F | 1.38303  | 2.48560  | 0.13727  |

|   |          |          |          |
|---|----------|----------|----------|
| C | 1.98919  | -0.03115 | -0.60716 |
| F | 2.53818  | 0.80265  | -1.52489 |
| F | 2.14838  | -1.28140 | -1.06800 |
| F | 2.71687  | 0.08092  | 0.52672  |
| C | -0.29589 | 0.44901  | -1.67019 |
| F | -1.61683 | 0.58239  | -1.54165 |
| F | -0.05793 | -0.60270 | -2.48308 |
| F | 0.15502  | 1.56627  | -2.31606 |

SCF energy = -1965.866108003

FREEH energy = 234.88

FREEH entropy = 0.58119

**[OR<sup>f</sup>]<sup>-</sup>**

|   |          |          |          |
|---|----------|----------|----------|
| O | 0.53850  | 1.75682  | 0.06111  |
| C | 0.16059  | 0.52370  | 0.01830  |
| C | 0.73622  | -0.25205 | -1.26404 |
| F | 0.67450  | -1.62401 | -1.22546 |
| F | 2.03555  | 0.06481  | -1.46356 |
| F | 0.07320  | 0.12075  | -2.39654 |
| C | 0.64118  | -0.31178 | 1.30225  |
| F | 0.01521  | -1.51592 | 1.51611  |
| F | 0.46555  | 0.41376  | 2.42972  |
| F | 1.97466  | -0.59086 | 1.23073  |
| C | -1.43641 | 0.37108  | -0.04490 |
| F | -1.96288 | 1.27168  | -0.90518 |
| F | -1.99902 | 0.62928  | 1.17085  |
| F | -1.91684 | -0.85726 | -0.42938 |

SCF energy = -1125.516828966

FREEH energy = 166.13

FREEH entropy = 0.47186

**C<sub>4</sub>F<sub>8</sub>O-Al(OR<sup>f</sup>)<sub>3</sub>**

|    |         |          |          |
|----|---------|----------|----------|
| Al | 0.11112 | -0.01004 | -0.22246 |
| O  | 1.12873 | -1.28000 | 0.30554  |
| C  | 2.13981 | -2.18590 | 0.30653  |
| C  | 3.10720 | -1.86112 | 1.50730  |
| F  | 2.39150 | -1.54131 | 2.60112  |
| F  | 3.89973 | -2.90591 | 1.81038  |
| F  | 3.89005 | -0.80693 | 1.20951  |
| C  | 1.51051 | -3.61590 | 0.49449  |
| F  | 0.44269 | -3.75364 | -0.31021 |
| F  | 2.38853 | -4.59588 | 0.21248  |
| F  | 1.08786 | -3.77853 | 1.76528  |
| C  | 2.94569 | -2.13012 | -1.04350 |
| F  | 3.14865 | -0.84786 | -1.40039 |
| F  | 4.13934 | -2.74007 | -0.94463 |

|                                     |          |          |          |                                                                                                    |          |          |          |
|-------------------------------------|----------|----------|----------|----------------------------------------------------------------------------------------------------|----------|----------|----------|
| F                                   | 2.25061  | -2.72335 | -2.03663 | <b>C<sub>4</sub>F<sub>8</sub>O-Al(OR<sup>F</sup>)<sub>2</sub>-F-Al(OR<sup>F</sup>)<sub>3</sub></b> |          |          |          |
| O                                   | -0.80299 | 0.12197  | 1.60104  | Al                                                                                                 | -1.16382 | -0.00322 | -1.33356 |
| C                                   | -2.11334 | -0.14358 | 2.19962  | O                                                                                                  | -0.83232 | -1.49694 | -2.13079 |
| C                                   | -0.83587 | -0.32174 | 2.94320  | O                                                                                                  | -2.41018 | 0.00506  | -0.12339 |
| F                                   | -0.39801 | 0.53193  | 3.84402  | O                                                                                                  | -1.01567 | 1.50524  | -2.15680 |
| F                                   | -0.36044 | -1.52988 | 3.17297  | C                                                                                                  | -0.18185 | 2.43278  | -2.69483 |
| C                                   | -2.98159 | 1.12607  | 2.33715  | C                                                                                                  | 0.75043  | 1.76403  | -3.76876 |
| F                                   | -3.31445 | 1.57467  | 1.12163  | F                                                                                                  | 1.20768  | 0.58563  | -3.28137 |
| F                                   | -4.09687 | 0.81091  | 3.02208  | F                                                                                                  | 1.81618  | 2.52728  | -4.07547 |
| F                                   | -2.33346 | 2.09842  | 2.98952  | F                                                                                                  | 0.07591  | 1.49933  | -4.89784 |
| C                                   | -2.86410 | -1.41978 | 1.73255  | C                                                                                                  | -1.06495 | 3.54404  | -3.37291 |
| F                                   | -3.42856 | -1.97228 | 2.82597  | F                                                                                                  | -1.61834 | 4.34068  | -2.43813 |
| F                                   | -2.01970 | -2.30068 | 1.18913  | C                                                                                                  | 0.69365  | 3.07248  | -1.55465 |
| F                                   | -3.82946 | -1.12737 | 0.85495  | F                                                                                                  | 1.68016  | 2.20666  | -1.19197 |
| O                                   | -1.48278 | -0.33891 | -0.89425 | F                                                                                                  | -0.05885 | 3.29424  | -0.46775 |
| C                                   | -1.82886 | -0.36554 | -2.22106 | F                                                                                                  | 1.27433  | 4.22420  | -1.92531 |
| C                                   | -3.02710 | -1.36142 | -2.41696 | F                                                                                                  | -2.05325 | 2.98151  | -4.07944 |
| F                                   | -2.81617 | -2.48378 | -1.71531 | F                                                                                                  | -0.32991 | 4.31716  | -4.20080 |
| F                                   | -4.17865 | -0.81093 | -1.99276 | C                                                                                                  | -3.65783 | 0.50322  | 0.11617  |
| F                                   | -3.16991 | -1.68906 | -3.71923 | C                                                                                                  | -1.19661 | -2.42691 | -3.05680 |
| C                                   | -2.24324 | 1.07834  | -2.69451 | C                                                                                                  | 0.03355  | -2.69589 | -4.00198 |
| F                                   | -1.14387 | 1.85234  | -2.82278 | F                                                                                                  | 0.19341  | -1.67410 | -4.86660 |
| F                                   | -2.88156 | 1.05489  | -3.88007 | F                                                                                                  | -0.11442 | -3.83013 | -4.71360 |
| F                                   | -3.04403 | 1.64569  | -1.78395 | F                                                                                                  | 1.16210  | -2.79947 | -3.27932 |
| C                                   | -0.59767 | -0.86651 | -3.06015 | C                                                                                                  | -1.59420 | -3.74964 | -2.30479 |
| F                                   | 0.54154  | -0.34713 | -2.43078 | F                                                                                                  | -0.49801 | -4.33863 | -1.78135 |
| F                                   | -0.57081 | -0.45143 | -4.32181 | F                                                                                                  | -2.19635 | -4.63390 | -3.12368 |
| F                                   | -0.46558 | -2.19275 | -3.02645 | F                                                                                                  | -2.43125 | -3.47236 | -1.29178 |
| O                                   | 0.62878  | 1.61811  | -0.37911 | C                                                                                                  | -2.41198 | -1.92565 | -3.92248 |
| C                                   | 1.33158  | 2.69220  | 0.06689  | F                                                                                                  | -2.23569 | -0.62447 | -4.23020 |
| C                                   | 1.50993  | 2.62563  | 1.62797  | F                                                                                                  | -3.56350 | -2.02501 | -3.22961 |
| F                                   | 1.80512  | 1.35416  | 1.99468  | F                                                                                                  | -2.54703 | -2.61959 | -5.06554 |
| F                                   | 0.36113  | 2.95626  | 2.25484  | C                                                                                                  | -3.59144 | 1.46621  | 1.35896  |
| F                                   | 2.48344  | 3.42929  | 2.07764  | F                                                                                                  | -3.50430 | 0.76371  | 2.51111  |
| C                                   | 2.74392  | 2.71280  | -0.62731 | F                                                                                                  | -4.67739 | 2.25655  | 1.44320  |
| F                                   | 2.62020  | 2.41694  | -1.92915 | F                                                                                                  | -2.49848 | 2.24515  | 1.27440  |
| F                                   | 3.34427  | 3.91273  | -0.51302 | C                                                                                                  | -4.61353 | -0.70863 | 0.41996  |
| F                                   | 3.54679  | 1.78313  | -0.06707 | F                                                                                                  | -4.00455 | -1.58497 | 1.23475  |
| C                                   | 0.52098  | 3.98640  | -0.31488 | F                                                                                                  | -4.91995 | -1.35469 | -0.72241 |
| F                                   | 0.62646  | 4.24016  | -1.63140 | F                                                                                                  | -5.76169 | -0.31201 | 1.00484  |
| F                                   | -0.78058 | 3.81029  | -0.03033 | C                                                                                                  | -4.20756 | 1.30712  | -1.12334 |
| F                                   | 0.96349  | 5.06598  | 0.36167  | F                                                                                                  | -3.68761 | 2.54730  | -1.16583 |
| SCF energy GEOOPT = -4644.686989998 |          |          |          | F                                                                                                  | -5.54650 | 1.41158  | -1.11624 |
| FREEH energy = 710.67               |          |          |          | F                                                                                                  | -3.83771 | 0.67102  | -2.25826 |
| FREEH entropy = 1.33007             |          |          |          | Al                                                                                                 | 1.05535  | 0.02655  | 1.42027  |
|                                     |          |          |          | O                                                                                                  | 1.23843  | -1.48521 | 2.28128  |
|                                     |          |          |          | O                                                                                                  | 1.30756  | 1.62903  | 1.94813  |

|   |          |          |          |
|---|----------|----------|----------|
| O | 2.88561  | -0.17837 | 0.57995  |
| C | 3.66972  | -1.12793 | -0.23849 |
| C | 3.16022  | -2.59240 | -0.23509 |
| F | 3.28626  | -3.16899 | 0.96258  |
| F | 3.88071  | -3.29565 | -1.12409 |
| F | 1.87070  | -2.59431 | -0.59618 |
| C | 4.07697  | -0.57225 | -1.63140 |
| F | 4.04948  | 0.76236  | -1.63220 |
| C | 4.22550  | -0.47921 | 0.97521  |
| F | 5.07320  | 0.52371  | 0.88332  |
| F | 4.36970  | -1.11741 | 2.11402  |
| F | 3.26040  | -1.03121 | -2.58293 |
| F | 5.33142  | -0.99059 | -1.88313 |
| C | 1.70661  | 2.52832  | 2.89473  |
| C | 0.23837  | -2.15472 | 2.95156  |
| C | -0.35387 | -3.26410 | 2.00724  |
| F | -0.98318 | -2.65270 | 0.97871  |
| F | -1.23033 | -4.05569 | 2.64442  |
| F | 0.62333  | -4.02531 | 1.50347  |
| C | 0.84358  | -2.78469 | 4.25354  |
| F | 1.63361  | -3.82725 | 3.95340  |
| F | -0.13900 | -3.21262 | 5.07304  |
| F | 1.58243  | -1.87261 | 4.90240  |
| C | -0.90530 | -1.13931 | 3.33697  |
| F | -0.85504 | -0.12927 | 2.32991  |
| F | -0.68684 | -0.50614 | 4.48244  |
| F | -2.12688 | -1.63188 | 3.32671  |
| C | 2.35432  | 1.78385  | 4.12076  |
| F | 1.40720  | 1.22368  | 4.89558  |
| F | 3.10772  | 2.58721  | 4.88086  |
| F | 3.13801  | 0.77424  | 3.66311  |
| C | 0.45284  | 3.35099  | 3.37423  |
| F | -0.57379 | 2.51549  | 3.60827  |
| F | 0.07171  | 4.22711  | 2.43248  |
| F | 0.72025  | 4.02902  | 4.50754  |
| C | 2.77131  | 3.48712  | 2.24563  |
| F | 3.93149  | 2.81229  | 2.05801  |
| F | 3.02398  | 4.55260  | 3.02403  |
| F | 2.35578  | 3.91858  | 1.05044  |
| F | 0.28980  | -0.03830 | -0.15651 |

SCF energy GEOOPT = -7238.040425367  
 FREEH energy = 1089.98  
 FREEH entropy = 1.92241

**COSMO ( $\epsilon = 8.93$ )/BP86-D3(BJ)/def-SV(P)**

F<sup>-</sup>

COSMO energy = -99.8190863141

**[Me<sub>3</sub>Si]<sup>+</sup>**

|    |          |          |          |
|----|----------|----------|----------|
| Si | 0.00010  | -0.00009 | -0.00101 |
| C  | 0.51839  | 1.76602  | -0.06393 |
| C  | -1.78604 | -0.43940 | -0.09393 |
| C  | 1.26775  | -1.32672 | 0.15676  |
| H  | 1.61766  | 1.89210  | 0.01577  |
| H  | 0.15604  | 2.21226  | -1.02007 |
| H  | 0.01279  | 2.32083  | 0.76105  |
| H  | -2.44008 | 0.45018  | -0.20146 |
| H  | -1.94444 | -1.13226 | -0.95348 |
| H  | -2.06467 | -1.00256 | 0.82798  |
| H  | 1.98590  | -1.24257 | -0.69256 |
| H  | 1.85330  | -1.15478 | 1.09061  |
| H  | 0.82331  | -2.34300 | 0.17428  |

COSMO energy = -408.8998450633

**Me<sub>3</sub>SiF**

|    |          |          |          |
|----|----------|----------|----------|
| Si | 0.00000  | 0.00000  | 0.42133  |
| C  | 0.90046  | -1.55964 | -0.11975 |
| C  | 0.90046  | 1.55964  | -0.11975 |
| C  | -1.80092 | 0.00000  | -0.11975 |
| F  | -0.00000 | 0.00000  | 2.08826  |
| H  | 0.38610  | -2.47183 | 0.25712  |
| H  | 1.94762  | -1.57029 | 0.25712  |
| H  | 0.93618  | -1.62151 | -1.23101 |
| H  | 0.38610  | 2.47183  | 0.25712  |
| H  | 1.94762  | 1.57029  | 0.25712  |
| H  | 0.93618  | 1.62151  | -1.23101 |
| H  | -2.33372 | 0.90155  | 0.25712  |
| H  | -2.33372 | -0.90155 | 0.25712  |
| H  | -1.87236 | 0.00000  | -1.23101 |

COSMO energy = -508.9476474420

**Me<sub>3</sub>SiCl**

|    |          |          |          |
|----|----------|----------|----------|
| Si | -0.00000 | 0.00000  | 0.39459  |
| C  | -0.90094 | 1.56048  | -0.15104 |
| C  | -0.90094 | -1.56048 | -0.15104 |
| C  | 1.80189  | 0.00000  | -0.15104 |
| Cl | 0.00000  | 0.00000  | 2.52457  |
| H  | -0.38555 | 2.47169  | 0.22456  |
| H  | -1.94777 | 1.56974  | 0.22456  |
| H  | -0.92961 | 1.61014  | -1.26358 |
| H  | -0.38555 | -2.47169 | 0.22456  |



|                                                     |          |          |          |   |          |          |          |
|-----------------------------------------------------|----------|----------|----------|---|----------|----------|----------|
| H                                                   | -1.94777 | -1.56974 | 0.22456  | O | 0.64002  | -1.61222 | -0.32103 |
| H                                                   | -0.92961 | -1.61014 | -1.26358 | C | 1.72166  | -2.40885 | -0.18736 |
| H                                                   | 2.33332  | -0.90195 | 0.22456  | C | 2.74712  | -1.86040 | 0.87979  |
| H                                                   | 2.33332  | 0.90195  | 0.22456  | F | 2.08016  | -1.33760 | 1.92451  |
| H                                                   | 1.85922  | 0.00000  | -1.26358 | F | 3.56774  | -2.82885 | 1.35150  |
| COSMO energy = -869.2823401519                      |          |          |          | F | 3.52451  | -0.88964 | 0.36063  |
| <b>F<sup>-</sup></b>                                |          |          |          | C | 1.22095  | -3.83052 | 0.27175  |
| SCF energy = -99.68993876116                        |          |          |          | F | 0.12408  | -4.18564 | -0.41313 |
|                                                     |          |          |          | F | 2.15600  | -4.79370 | 0.08970  |
| <b>COF<sub>2</sub></b>                              |          |          |          | F | 0.89810  | -3.81545 | 1.58397  |
| C                                                   | 0.00000  | 0.00000  | 0.09151  | C | 2.45414  | -2.53777 | -1.57543 |
| O                                                   | 0.00000  | 0.00000  | 1.27899  | F | 2.57456  | -1.33331 | -2.15383 |
| F                                                   | -1.07277 | 0.00000  | -0.68525 | F | 3.69441  | -3.07106 | -1.45269 |
| F                                                   | 1.07277  | 0.00000  | -0.68525 | F | 1.75397  | -3.32989 | -2.41584 |
| COSMO energy = -312.8080448842                      |          |          |          | O | -0.56246 | 0.25105  | 1.66347  |
|                                                     |          |          |          | C | -1.55959 | -0.01972 | 2.53187  |
| <b>[COF<sub>3</sub>]<sup>-</sup></b>                |          |          |          | C | -1.16440 | 0.61490  | 3.91842  |
| C                                                   | 0.00000  | 0.00000  | 0.14323  | F | -1.34040 | 1.95388  | 3.89729  |
| O                                                   | -0.00000 | 0.00000  | 1.37210  | F | -1.90505 | 0.12104  | 4.93966  |
| F                                                   | 0.63918  | 1.10710  | -0.50511 | F | 0.12676  | 0.37741  | 4.19176  |
| F                                                   | 0.63918  | -1.10710 | -0.50511 | C | -2.92589 | 0.60765  | 2.05142  |
| F                                                   | -1.27837 | 0.00000  | -0.50511 | F | -3.50242 | -0.15699 | 1.10135  |
| COSMO energy = -412.7275330459                      |          |          |          | F | -3.81643 | 0.72956  | 3.06733  |
|                                                     |          |          |          | F | -2.72030 | 1.82694  | 1.53312  |
| <b>CH<sub>2</sub>Cl<sub>2</sub></b>                 |          |          |          | C | -1.73947 | -1.57328 | 2.70618  |
| C                                                   | 0.00000  | 0.00000  | 0.14834  | F | -2.89553 | -1.89774 | 3.33050  |
| Cl                                                  | 0.00000  | -1.49598 | -0.84216 | F | -0.72380 | -2.09444 | 3.42429  |
| Cl                                                  | 0.00000  | 1.49598  | -0.84216 | F | -1.73761 | -2.17413 | 1.50160  |
| H                                                   | -0.91440 | 0.00000  | 0.76776  | O | -1.39099 | 0.23593  | -1.03796 |
| H                                                   | 0.91440  | 0.00000  | 0.76776  | C | -1.91228 | 0.04944  | -2.26784 |
| COSMO energy = -959.4907195418                      |          |          |          | C | -2.92478 | -1.15768 | -2.23653 |
|                                                     |          |          |          | F | -2.40175 | -2.18725 | -1.55418 |
| <b>[CH<sub>2</sub>Cl]<sup>+</sup></b>               |          |          |          | F | -4.07721 | -0.80451 | -1.62755 |
| C                                                   | -0.09353 | 0.09693  | 0.00000  | F | -3.23994 | -1.59377 | -3.48064 |
| Cl                                                  | 1.02335  | -1.05944 | 0.00000  | C | -2.68086 | 1.36302  | -2.67424 |
| H                                                   | -0.46491 | 0.48125  | -0.97264 | F | -1.80778 | 2.32874  | -3.03604 |
| H                                                   | -0.46491 | 0.48125  | 0.97264  | F | -3.52753 | 1.16546  | -3.71316 |
| COSMO energy = -499.0904465385                      |          |          |          | F | -3.39625 | 1.82730  | -1.63972 |
|                                                     |          |          |          | C | -0.79875 | -0.24678 | -3.34417 |
| <b>[Al(OR<sup>F</sup>)<sub>4</sub>]<sup>-</sup></b> |          |          |          | F | 0.27480  | 0.53013  | -3.11744 |
| Al                                                  | -0.00338 | -0.00786 | 0.01423  | F | -1.22365 | -0.01508 | -4.60798 |
|                                                     |          |          |          | F | -0.39432 | -1.53264 | -3.28016 |
|                                                     |          |          |          | O | 1.33632  | 1.10547  | -0.24309 |
|                                                     |          |          |          | C | 1.75299  | 2.37620  | -0.06421 |
|                                                     |          |          |          | C | 1.94038  | 2.70226  | 1.46813  |
|                                                     |          |          |          | F | 2.49138  | 1.65694  | 2.10196  |
|                                                     |          |          |          | F | 0.75355  | 2.96410  | 2.05508  |
|                                                     |          |          |          | F | 2.73788  | 3.78079  | 1.66813  |

|   |          |         |          |
|---|----------|---------|----------|
| C | 3.14048  | 2.52590 | -0.79487 |
| F | 3.10184  | 1.93799 | -1.99944 |
| F | 3.48997  | 3.82275 | -0.97373 |
| F | 4.12234  | 1.93379 | -0.08095 |
| C | 0.72918  | 3.39714 | -0.68669 |
| F | 0.79640  | 3.38179 | -2.03346 |
| F | -0.52617 | 3.06052 | -0.33682 |
| F | 0.94732  | 4.66869 | -0.27744 |

COSMO energy = -4744.7142036950

**C<sub>4</sub>F<sub>8</sub>O-Al(OR<sup>F</sup>)<sub>3</sub>**

|    |          |          |          |
|----|----------|----------|----------|
| Al | 0.08930  | -0.00698 | -0.18735 |
| O  | 1.16560  | -1.24316 | 0.30101  |
| C  | 2.15061  | -2.17365 | 0.30066  |
| C  | 3.12078  | -1.87574 | 1.50615  |
| F  | 2.41022  | -1.54831 | 2.59927  |
| F  | 3.89285  | -2.93856 | 1.80448  |
| F  | 3.92688  | -0.83594 | 1.21571  |
| C  | 1.49225  | -3.59225 | 0.47948  |
| F  | 0.42147  | -3.70264 | -0.32540 |
| F  | 2.35086  | -4.58832 | 0.18802  |
| F  | 1.06887  | -3.75753 | 1.74887  |
| C  | 2.96208  | -2.12973 | -1.04742 |
| F  | 3.19278  | -0.85233 | -1.40066 |
| F  | 4.14458  | -2.76415 | -0.94447 |
| F  | 2.26056  | -2.70887 | -2.04345 |
| O  | -0.80645 | 0.10359  | 1.61284  |
| C  | -2.11272 | -0.13998 | 2.23539  |
| C  | -0.83140 | -0.35054 | 2.96197  |
| F  | -0.35741 | 0.49129  | 3.84980  |
| F  | -0.37239 | -1.56698 | 3.16797  |
| C  | -2.94856 | 1.15263  | 2.37700  |
| F  | -3.18603 | 1.64918  | 1.15357  |
| F  | -4.11310 | 0.85747  | 2.97490  |
| F  | -2.30942 | 2.08129  | 3.09648  |
| C  | -2.89532 | -1.39052 | 1.75072  |
| F  | -3.49646 | -1.93459 | 2.82278  |
| F  | -2.06516 | -2.29039 | 1.21088  |
| F  | -3.82979 | -1.05803 | 0.85207  |
| O  | -1.47271 | -0.36625 | -0.90518 |
| C  | -1.81474 | -0.38669 | -2.23201 |
| C  | -2.99905 | -1.39819 | -2.43478 |
| F  | -2.77259 | -2.52195 | -1.74109 |
| F  | -4.15858 | -0.86646 | -2.00665 |
| F  | -3.13902 | -1.71843 | -3.73959 |
| C  | -2.25233 | 1.05422  | -2.69292 |

|   |          |          |          |
|---|----------|----------|----------|
| F | -1.16613 | 1.84745  | -2.81898 |
| F | -2.89476 | 1.03103  | -3.87690 |
| F | -3.05922 | 1.60316  | -1.77580 |
| C | -0.57618 | -0.86084 | -3.07721 |
| F | 0.55271  | -0.33014 | -2.45606 |
| F | -0.57178 | -0.43891 | -4.33838 |
| F | -0.42815 | -2.18728 | -3.05320 |
| O | 0.58949  | 1.62826  | -0.36920 |
| C | 1.30577  | 2.69538  | 0.07004  |
| C | 1.48812  | 2.63656  | 1.63133  |
| F | 1.78571  | 1.36797  | 2.00214  |
| F | 0.34251  | 2.97254  | 2.25800  |
| F | 2.46517  | 3.44328  | 2.07186  |
| C | 2.71686  | 2.69859  | -0.62700 |
| F | 2.58867  | 2.39697  | -1.92754 |
| F | 3.33021  | 3.89394  | -0.52197 |
| F | 3.51381  | 1.76526  | -0.06425 |
| C | 0.50958  | 3.99678  | -0.31764 |
| F | 0.61495  | 4.23999  | -1.63763 |
| F | -0.79222 | 3.84046  | -0.02881 |
| F | 0.96844  | 5.07708  | 0.34818  |

COSMO energy = -4644.6914991082

**[al-f-al]<sup>-</sup>**

|    |          |          |          |
|----|----------|----------|----------|
| Al | -1.18822 | -0.09873 | -1.36316 |
| O  | -0.85949 | -1.68507 | -2.00946 |
| O  | -2.81444 | -0.06095 | -0.74257 |
| O  | -0.88242 | 1.31652  | -2.32455 |
| C  | 0.04584  | 2.09571  | -2.93201 |
| C  | 1.02136  | 1.21576  | -3.79919 |
| F  | 1.35170  | 0.10378  | -3.11308 |
| F  | 2.15822  | 1.86421  | -4.12239 |
| F  | 0.42409  | 0.82716  | -4.94328 |
| C  | -0.70730 | 3.11418  | -3.86396 |
| F  | -1.27637 | 4.09860  | -3.13878 |
| C  | 0.86864  | 2.88166  | -1.84648 |
| F  | 1.73686  | 2.04181  | -1.24049 |
| F  | 0.04899  | 3.37072  | -0.90661 |
| F  | 1.57510  | 3.90522  | -2.37149 |
| F  | -1.67918 | 2.49279  | -4.54717 |
| F  | 0.13436  | 3.69162  | -4.75227 |
| C  | -3.78947 | 0.77760  | -0.30827 |
| C  | -1.35994 | -2.59514 | -2.88519 |
| C  | -0.22098 | -2.97401 | -3.90486 |
| F  | -0.05721 | -1.98599 | -4.81152 |
| F  | -0.49904 | -4.11237 | -4.58025 |
| F  | 0.94321  | -3.14144 | -3.26481 |

|    |          |          |          |                                                                                                    |          |          |          |
|----|----------|----------|----------|----------------------------------------------------------------------------------------------------|----------|----------|----------|
| C  | -1.80785 | -3.88401 | -2.10053 | F                                                                                                  | -1.20771 | -0.35519 | 3.50066  |
| F  | -0.73862 | -4.59906 | -1.69991 | F                                                                                                  | -0.09873 | -1.33215 | 5.09571  |
| F  | -2.58037 | -4.69141 | -2.86468 | F                                                                                                  | -1.88594 | -2.27963 | 4.27792  |
| F  | -2.51247 | -3.54476 | -1.00912 | C                                                                                                  | 1.52311  | 1.89474  | 4.30877  |
| C  | -2.59890 | -2.02679 | -3.67819 | F                                                                                                  | 0.42808  | 1.56540  | 5.01956  |
| F  | -2.37894 | -0.72783 | -3.97473 | F                                                                                                  | 2.28968  | 2.69556  | 5.07582  |
| F  | -3.72236 | -2.08755 | -2.93780 | F                                                                                                  | 2.21223  | 0.75666  | 4.07349  |
| F  | -2.82527 | -2.68748 | -4.83109 | C                                                                                                  | -0.04431 | 3.57714  | 3.16271  |
| C  | -3.27380 | 1.62290  | 0.91421  | F                                                                                                  | -1.19837 | 2.92344  | 3.36314  |
| F  | -3.21428 | 0.86683  | 2.02624  | F                                                                                                  | -0.19868 | 4.37262  | 2.08659  |
| F  | -4.05762 | 2.68980  | 1.17552  | F                                                                                                  | 0.18126  | 4.36872  | 4.23708  |
| F  | -2.02897 | 2.06797  | 0.65371  | C                                                                                                  | 2.38863  | 3.32304  | 2.36384  |
| C  | -5.00444 | -0.11525 | 0.13922  | F                                                                                                  | 3.49007  | 2.54783  | 2.45846  |
| F  | -4.57750 | -1.16122 | 0.85958  | F                                                                                                  | 2.63316  | 4.47301  | 3.03124  |
| F  | -5.65791 | -0.59744 | -0.93953 | F                                                                                                  | 2.20776  | 3.62394  | 1.07067  |
| F  | -5.89266 | 0.57878  | 0.88699  | F                                                                                                  | -0.03102 | -0.03849 | 0.02185  |
| C  | -4.25482 | 1.75286  | -1.45677 | COSMO energy = -7338.0904129776                                                                    |          |          |          |
| F  | -3.38958 | 2.77812  | -1.59809 | <b>C<sub>4</sub>F<sub>8</sub>O-Al(OR<sup>F</sup>)<sub>2</sub>-F-Al(OR<sup>F</sup>)<sub>3</sub></b> |          |          |          |
| F  | -5.47609 | 2.27988  | -1.21098 | Al                                                                                                 | -1.14109 | -0.00752 | -1.31119 |
| F  | -4.30955 | 1.09706  | -2.62636 | O                                                                                                  | -0.82094 | -1.49250 | -2.13037 |
| Al | 1.16033  | 0.08321  | 1.37759  | O                                                                                                  | -2.42375 | -0.00916 | -0.14081 |
| O  | 0.96178  | -1.35831 | 2.32608  | O                                                                                                  | -1.01887 | 1.50259  | -2.14143 |
| O  | 0.69891  | 1.62314  | 2.05144  | C                                                                                                  | -0.19414 | 2.42830  | -2.69613 |
| O  | 2.74529  | 0.14469  | 0.67081  | C                                                                                                  | 0.72411  | 1.75732  | -3.78152 |
| C  | 3.82992  | -0.58469 | 0.30964  | F                                                                                                  | 1.19060  | 0.58388  | -3.29934 |
| C  | 3.40945  | -1.98185 | -0.28892 | F                                                                                                  | 1.78027  | 2.52487  | -4.10940 |
| F  | 3.12770  | -2.86317 | 0.69297  | F                                                                                                  | 0.02993  | 1.48867  | -4.90041 |
| F  | 4.37692  | -2.52205 | -1.06079 | C                                                                                                  | -1.08860 | 3.53408  | -3.36698 |
| F  | 2.30236  | -1.83919 | -1.03687 | F                                                                                                  | -1.63252 | 4.33536  | -2.42975 |
| C  | 4.60993  | 0.23611  | -0.78449 | C                                                                                                  | 0.69661  | 3.07560  | -1.57186 |
| F  | 4.67827  | 1.52907  | -0.43881 | F                                                                                                  | 1.68434  | 2.21392  | -1.21541 |
| C  | 4.76180  | -0.81015 | 1.55742  | F                                                                                                  | -0.04442 | 3.31032  | -0.47942 |
| F  | 4.03043  | -1.17776 | 2.62242  | F                                                                                                  | 1.27211  | 4.22588  | -1.96116 |
| F  | 5.41118  | 0.32716  | 1.88093  | F                                                                                                  | -2.08657 | 2.96671  | -4.05777 |
| F  | 5.68960  | -1.76722 | 1.33098  | F                                                                                                  | -0.36855 | 4.30599  | -4.20962 |
| F  | 3.97693  | 0.15809  | -1.97320 | C                                                                                                  | -3.66082 | 0.50517  | 0.10724  |
| F  | 5.87145  | -0.22160 | -0.95625 | C                                                                                                  | -1.19677 | -2.41996 | -3.05179 |
| C  | 1.13239  | 2.55962  | 2.93502  | C                                                                                                  | 0.03504  | -2.71726 | -3.98701 |
| C  | 0.10437  | -2.25192 | 2.87784  | F                                                                                                  | 0.21569  | -1.70440 | -4.85960 |
| C  | -0.80870 | -2.87612 | 1.76008  | F                                                                                                  | -0.13147 | -3.85399 | -4.69374 |
| F  | -1.75191 | -1.98241 | 1.38626  | F                                                                                                  | 1.15506  | -2.83599 | -3.25860 |
| F  | -1.43491 | -3.99971 | 2.16569  | C                                                                                                  | -1.62540 | -3.73272 | -2.29813 |
| F  | -0.06854 | -3.16765 | 0.68057  | F                                                                                                  | -0.54656 | -4.34552 | -1.77064 |
| C  | 0.95713  | -3.38435 | 3.55866  | F                                                                                                  | -2.24513 | -4.60500 | -3.12004 |
| F  | 1.47711  | -4.21505 | 2.63260  | F                                                                                                  | -2.46239 | -3.43509 | -1.29088 |
| F  | 0.21011  | -4.12803 | 4.40696  | C                                                                                                  | -2.39704 | -1.90172 | -3.92898 |
| F  | 1.97473  | -2.85167 | 4.25018  |                                                                                                    |          |          |          |
| C  | -0.79556 | -1.54991 | 3.96183  |                                                                                                    |          |          |          |

|    |          |          |          |
|----|----------|----------|----------|
| F  | -2.19938 | -0.60507 | -4.24069 |
| F  | -3.55649 | -1.98095 | -3.24541 |
| F  | -2.53532 | -2.59798 | -5.07149 |
| C  | -3.57830 | 1.46348  | 1.35364  |
| F  | -3.49576 | 0.75841  | 2.50217  |
| F  | -4.65734 | 2.26619  | 1.44294  |
| F  | -2.47921 | 2.23238  | 1.26461  |
| C  | -4.62975 | -0.69603 | 0.41274  |
| F  | -4.02938 | -1.58237 | 1.22044  |
| F  | -4.95183 | -1.33399 | -0.73143 |
| F  | -5.77157 | -0.28682 | 1.00401  |
| C  | -4.21137 | 1.32054  | -1.12504 |
| F  | -3.67631 | 2.55530  | -1.16685 |
| F  | -5.55032 | 1.44506  | -1.10043 |
| F  | -3.86678 | 0.68730  | -2.26686 |
| Al | 1.10870  | 0.01178  | 1.42279  |
| O  | 1.25447  | -1.49792 | 2.28898  |
| O  | 1.28393  | 1.62862  | 1.94761  |
| O  | 2.91080  | -0.17227 | 0.59274  |
| C  | 3.70821  | -1.12047 | -0.21782 |
| C  | 3.20026  | -2.58532 | -0.21164 |
| F  | 3.32219  | -3.16199 | 0.98356  |
| F  | 3.90523  | -3.28954 | -1.10747 |
| F  | 1.90361  | -2.57671 | -0.56801 |
| C  | 4.09471  | -0.56523 | -1.61727 |
| F  | 4.07451  | 0.77042  | -1.61355 |
| C  | 4.26840  | -0.46989 | 0.99087  |
| F  | 5.09864  | 0.54073  | 0.89517  |
| F  | 4.40196  | -1.10019 | 2.13049  |
| F  | 3.24101  | -1.01232 | -2.54655 |
| F  | 5.33175  | -0.99401 | -1.90539 |
| C  | 1.69335  | 2.52496  | 2.89308  |
| C  | 0.24952  | -2.16865 | 2.94952  |
| C  | -0.33248 | -3.27668 | 1.99818  |
| F  | -0.95487 | -2.66357 | 0.96361  |
| F  | -1.21592 | -4.06967 | 2.62411  |
| F  | 0.64774  | -4.03628 | 1.49994  |
| C  | 0.84542  | -2.80181 | 4.25489  |
| F  | 1.64077  | -3.84073 | 3.95647  |
| F  | -0.14352 | -3.23550 | 5.06313  |
| F  | 1.57555  | -1.88941 | 4.91227  |
| C  | -0.89815 | -1.15478 | 3.32667  |
| F  | -0.84723 | -0.14934 | 2.32253  |
| F  | -0.68684 | -0.52292 | 4.47410  |
| F  | -2.11904 | -1.65391 | 3.31068  |
| C  | 2.33149  | 1.77755  | 4.12319  |
| F  | 1.37730  | 1.24225  | 4.90608  |
| F  | 3.10260  | 2.57379  | 4.87298  |

|   |          |          |          |
|---|----------|----------|----------|
| F | 3.09265  | 0.75116  | 3.66730  |
| C | 0.44604  | 3.35918  | 3.36729  |
| F | -0.58830 | 2.53563  | 3.60425  |
| F | 0.07272  | 4.23441  | 2.41880  |
| F | 0.71774  | 4.04349  | 4.49604  |
| C | 2.76824  | 3.47344  | 2.24518  |
| F | 3.92315  | 2.79190  | 2.06606  |
| F | 3.02217  | 4.54271  | 3.01930  |
| F | 2.35895  | 3.90281  | 1.04543  |
| F | 0.30293  | -0.03900 | -0.14319 |

COSMO energy + OC. Corr. = -  
7238.0476179385

**COSMO ( $\epsilon = 16.3$ )/BP86-D3(BJ)/def-SV(P)**

**[ $aI-f-aI$ ]**

|    |          |          |          |
|----|----------|----------|----------|
| Al | -1.18828 | -0.09905 | -1.36233 |
| O  | -0.86308 | -1.68623 | -2.00805 |
| O  | -2.81362 | -0.05798 | -0.73961 |
| O  | -0.88071 | 1.31518  | -2.32464 |
| C  | 0.04810  | 2.09182  | -2.93449 |
| C  | 1.02370  | 1.20856  | -3.79826 |
| F  | 1.35289  | 0.09853  | -3.10835 |
| F  | 2.16119  | 1.85524  | -4.12264 |
| F  | 0.42699  | 0.81668  | -4.94147 |
| C  | -0.70418 | 3.10742  | -3.87028 |
| F  | -1.27380 | 4.09411  | -3.14858 |
| C  | 0.87074  | 2.88102  | -1.85127 |
| F  | 1.73680  | 2.04243  | -1.24057 |
| F  | 0.05072  | 3.37548  | -0.91446 |
| F  | 1.57949  | 3.90132  | -2.37960 |
| F  | -1.67564 | 2.48379  | -4.55211 |
| F  | 0.13820  | 3.68184  | -4.75964 |
| C  | -3.78664 | 0.78321  | -0.30584 |
| C  | -1.36538 | -2.59563 | -2.88343 |
| C  | -0.22601 | -2.97974 | -3.90063 |
| F  | -0.05717 | -1.99339 | -4.80816 |
| F  | -0.50675 | -4.11795 | -4.57487 |
| F  | 0.93648  | -3.15016 | -3.25807 |
| C  | -1.81913 | -3.88212 | -2.09816 |
| F  | -0.75313 | -4.60104 | -1.69576 |
| F  | -2.59405 | -4.68704 | -2.86225 |
| F  | -2.52333 | -3.53904 | -1.00758 |
| C  | -2.60107 | -2.02387 | -3.67906 |
| F  | -2.37607 | -0.72600 | -3.97669 |
| F  | -3.72575 | -2.07967 | -2.94000 |
| F  | -2.82802 | -2.68512 | -4.83135 |

|    |          |          |          |                                 |          |          |          |
|----|----------|----------|----------|---------------------------------|----------|----------|----------|
| C  | -3.26614 | 1.63446  | 0.91043  | F                               | -1.20375 | 2.91546  | 3.36640  |
| F  | -3.20279 | 0.88388  | 2.02599  | F                               | -0.20773 | 4.36835  | 2.09117  |
| F  | -4.04845 | 2.70303  | 1.16929  | F                               | 0.17310  | 4.36270  | 4.24152  |
| F  | -2.02209 | 2.07764  | 0.64310  | C                               | 2.38172  | 3.32405  | 2.36568  |
| C  | -5.00035 | -0.10673 | 0.15076  | F                               | 3.48499  | 2.55122  | 2.45865  |
| F  | -4.57094 | -1.14918 | 0.87492  | F                               | 2.62401  | 4.47383  | 3.03397  |
| F  | -5.65792 | -0.59429 | -0.92300 | F                               | 2.19915  | 3.62567  | 1.07283  |
| F  | -5.88526 | 0.59155  | 0.89827  | F                               | -0.03003 | -0.04036 | 0.02171  |
| C  | -4.25575 | 1.75278  | -1.45759 | COSMO energy = -7338.0933859142 |          |          |          |
| F  | -3.39006 | 2.77647  | -1.60786 | <b>[f-a]</b>                    |          |          |          |
| F  | -5.47544 | 2.28212  | -1.20971 | F                               | -1.28739 | -0.67329 | 2.23954  |
| F  | -4.31557 | 1.09077  | -2.62348 | Al                              | -0.47067 | -0.27458 | 0.80467  |
| Al | 1.16022  | 0.08231  | 1.37811  | O                               | 1.25570  | -0.03618 | 1.09543  |
| O  | 0.96330  | -1.36002 | 2.32566  | C                               | 2.14005  | 0.91060  | 1.47219  |
| O  | 0.69546  | 1.62087  | 2.05247  | C                               | 3.51667  | 0.19295  | 1.73605  |
| O  | 2.74523  | 0.14719  | 0.67187  | F                               | 3.32851  | -0.93952 | 2.43085  |
| C  | 3.83188  | -0.57922 | 0.31084  | F                               | 4.11316  | -0.13565 | 0.56989  |
| C  | 3.41517  | -1.97570 | -0.29176 | F                               | 4.37927  | 0.97088  | 2.43317  |
| F  | 3.13206  | -2.85947 | 0.68758  | C                               | 2.33326  | 1.99086  | 0.33650  |
| F  | 4.38552  | -2.51279 | -1.06214 | F                               | 1.33607  | 2.89904  | 0.35089  |
| F  | 2.30985  | -1.83336 | -1.04244 | F                               | 3.50002  | 2.67004  | 0.46872  |
| C  | 4.61216  | 0.24566  | -0.78005 | F                               | 2.33215  | 1.39835  | -0.86727 |
| F  | 4.67728  | 1.53793  | -0.43111 | C                               | 1.66986  | 1.62885  | 2.79048  |
| C  | 4.76219  | -0.80590 | 1.55960  | F                               | 0.36365  | 1.94936  | 2.69824  |
| F  | 4.02965  | -1.17782 | 2.62237  | F                               | 1.80908  | 0.81183  | 3.85667  |
| F  | 5.40839  | 0.33203  | 1.88709  | F                               | 2.35950  | 2.76303  | 3.04523  |
| F  | 5.69225  | -1.76040 | 1.33225  | O                               | -1.08732 | 1.20759  | 0.07380  |
| F  | 3.98118  | 0.16933  | -1.97002 | C                               | -2.12976 | 1.73781  | -0.59756 |
| F  | 5.87470  | -0.20920 | -0.95080 | C                               | -2.95854 | 2.65041  | 0.38342  |
| C  | 1.12756  | 2.55727  | 2.93689  | F                               | -3.69781 | 1.88904  | 1.22255  |
| C  | 0.10679  | -2.25632 | 2.87449  | F                               | -3.80237 | 3.48618  | -0.26584 |
| C  | -0.80376 | -2.87990 | 1.75436  | F                               | -2.13444 | 3.39521  | 1.13655  |
| F  | -1.74871 | -1.98744 | 1.38185  | C                               | -1.56448 | 2.61320  | -1.77785 |
| F  | -1.42785 | -4.00591 | 2.15655  | F                               | -1.04030 | 3.76674  | -1.31191 |
| F  | -0.06202 | -3.16713 | 0.67477  | F                               | -0.58961 | 1.95212  | -2.42084 |
| C  | 0.96083  | -3.38852 | 3.55400  | F                               | -2.52060 | 2.93559  | -2.68240 |
| F  | 1.48430  | -4.21553 | 2.62651  | C                               | -3.07752 | 0.62758  | -1.19224 |
| F  | 0.21412  | -4.13590 | 4.39903  | F                               | -3.28399 | -0.33772 | -0.27416 |
| F  | 1.97612  | -2.85514 | 4.24845  | F                               | -4.28608 | 1.11624  | -1.55428 |
| C  | -0.79590 | -1.55816 | 3.95867  | F                               | -2.52641 | 0.05069  | -2.27783 |
| F  | -1.21045 | -0.36366 | 3.49891  | O                               | -0.62428 | -1.56065 | -0.39717 |
| F  | -0.10075 | -1.34055 | 5.09351  | C                               | -0.03845 | -2.69543 | -0.83024 |
| F  | -1.88484 | -2.29105 | 4.27226  | C                               | 0.10306  | -3.73286 | 0.34312  |
| C  | 1.52057  | 1.89156  | 4.30952  | F                               | -1.10136 | -4.24577 | 0.67581  |
| F  | 0.42661  | 1.55788  | 5.01991  | F                               | 0.92106  | -4.76438 | 0.03574  |
| F  | 2.28506  | 2.69334  | 5.07736  | F                               | 0.59630  | -3.12279 | 1.43912  |
| F  | 2.21283  | 0.75567  | 4.07219  |                                 |          |          |          |
| C  | -0.05114 | 3.57204  | 3.16643  |                                 |          |          |          |

|   |          |          |          |
|---|----------|----------|----------|
| C | 1.39075  | -2.41012 | -1.44139 |
| F | 1.37721  | -1.25454 | -2.12311 |
| F | 2.32713  | -2.31215 | -0.47611 |
| F | 1.78880  | -3.39188 | -2.28887 |
| C | -0.96331 | -3.29905 | -1.95277 |
| F | -2.25064 | -3.24939 | -1.57627 |
| F | -0.84377 | -2.58937 | -3.09575 |
| F | -0.66219 | -4.58888 | -2.23477 |

COSMO energy = -3719.0169799090

**SO<sub>2</sub>-Al(OR<sup>F</sup>)<sub>3</sub>**

|    |          |          |          |
|----|----------|----------|----------|
| S  | -1.47391 | 0.70187  | -3.07041 |
| O  | -0.40342 | -0.15111 | -2.37637 |
| Al | -0.03093 | -0.05480 | -0.49776 |
| O  | -0.61243 | -1.54752 | 0.14431  |
| C  | -1.72289 | -2.23430 | 0.52813  |
| C  | -2.32828 | -1.60066 | 1.83773  |
| F  | -3.02183 | -0.48048 | 1.54174  |
| F  | -1.33884 | -1.25817 | 2.67717  |
| F  | -3.15874 | -2.44980 | 2.47229  |
| C  | -1.28079 | -3.71901 | 0.80826  |
| F  | -2.34328 | -4.54701 | 0.88856  |
| F  | -0.47764 | -4.15369 | -0.17279 |
| F  | -0.59997 | -3.79192 | 1.96806  |
| C  | -2.79763 | -2.21067 | -0.61999 |
| F  | -2.41063 | -2.97627 | -1.65361 |
| F  | -4.00685 | -2.61533 | -0.20931 |
| F  | -2.92063 | -0.93773 | -1.09302 |
| O  | -0.99130 | 1.36483  | -0.19065 |
| C  | -0.93725 | 2.64388  | 0.28250  |
| C  | -0.78996 | 3.61867  | -0.94206 |
| F  | -0.40656 | 4.85227  | -0.58216 |
| F  | 0.12517  | 3.11854  | -1.80715 |
| F  | -1.95515 | 3.71079  | -1.61611 |
| C  | -2.28616 | 2.93095  | 1.03937  |
| F  | -2.48109 | 4.25281  | 1.22479  |
| F  | -2.27901 | 2.33044  | 2.24585  |
| F  | -3.32094 | 2.44326  | 0.34010  |
| C  | 0.27457  | 2.84215  | 1.26932  |
| F  | 0.10135  | 3.90452  | 2.07602  |
| F  | 0.41218  | 1.74140  | 2.03446  |
| F  | 1.42414  | 3.01772  | 0.58934  |
| O  | 1.67045  | 0.19701  | -0.37606 |
| C  | 2.86618  | -0.45779 | -0.34149 |
| C  | 3.99204  | 0.63635  | -0.25466 |
| F  | 4.03730  | 1.16498  | 0.98449  |
| F  | 3.74030  | 1.63020  | -1.11863 |

|   |          |          |          |
|---|----------|----------|----------|
| F | 5.20736  | 0.12270  | -0.53826 |
| C | 2.94215  | -1.40048 | 0.91973  |
| F | 4.21155  | -1.73465 | 1.22378  |
| F | 2.25143  | -2.53953 | 0.70395  |
| F | 2.39549  | -0.78710 | 1.98233  |
| C | 3.04549  | -1.30931 | -1.65065 |
| F | 4.04147  | -2.20670 | -1.54683 |
| F | 1.89873  | -1.97553 | -1.91227 |
| F | 3.29747  | -0.51304 | -2.70681 |
| O | -1.55872 | 0.42727  | -4.50523 |

COSMO energy = -4167.4690337173
